# Supplementary material for: Ibuprofen Degradation and Associated Bacterial Communities in Hyporheic Zone Sediments
Source: PubMed Central journal article supplement (PMC7464344; doi:10.3390/microorganisms8081245), 2020-08-16
Supplement: microorganisms-08-01245-s001.pdf [file microorganisms-08-01245-s001.pdf]

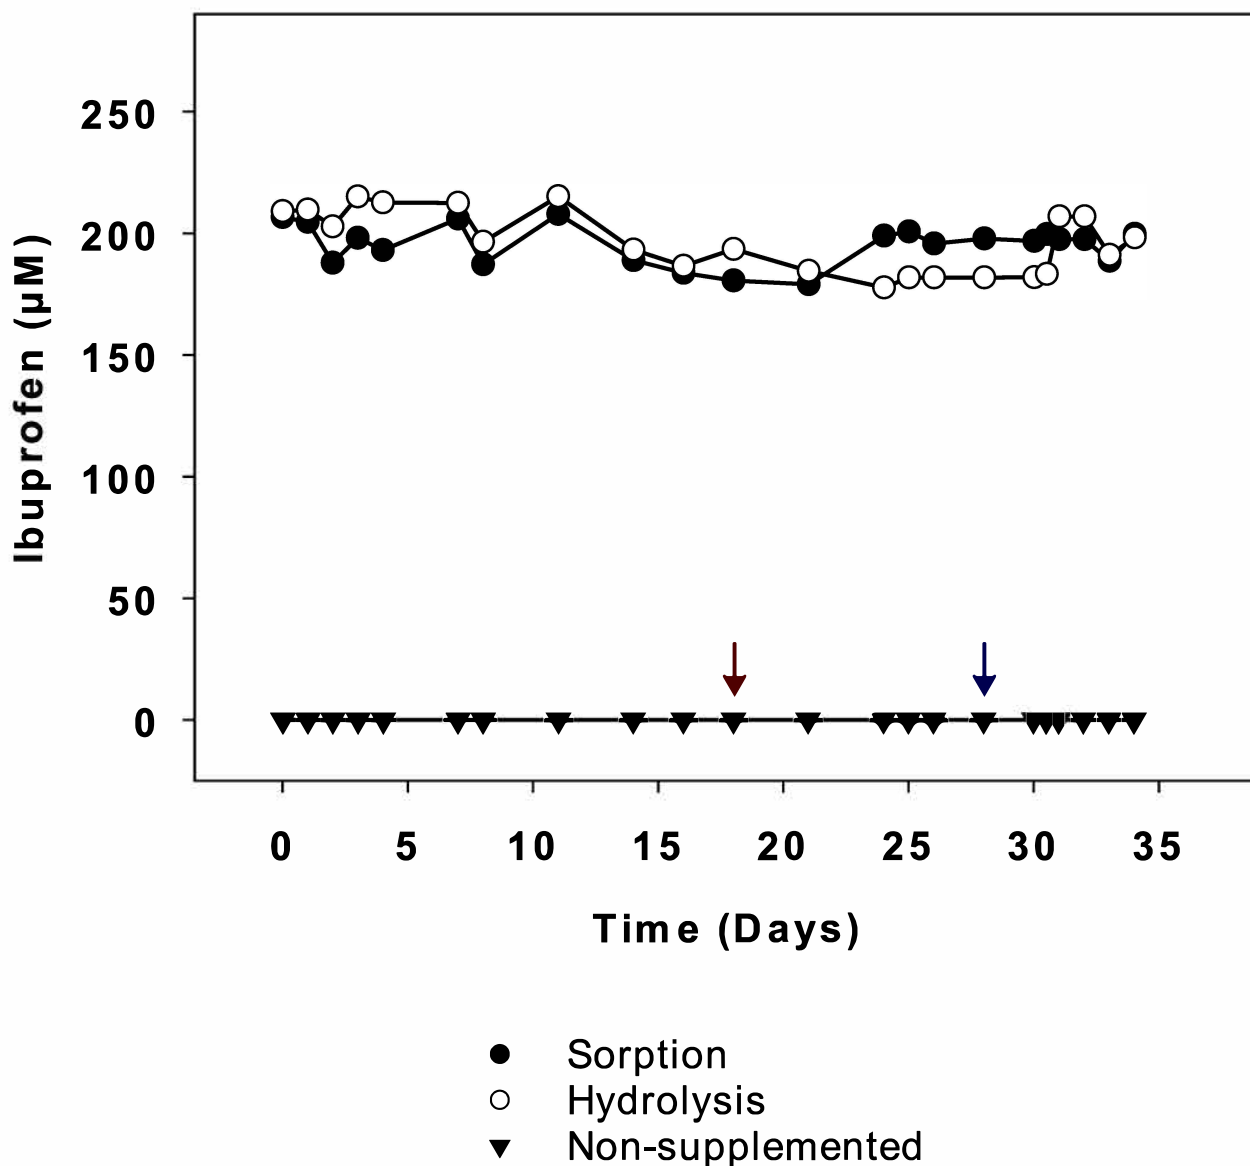

**Figure S1:** Control microcosms for the ibuprofen degradation experiment (Fig. 1).

'Non-supplemented' represents the unamended sediment. The abiotic controls 'Sorption' and 'Hydrolysis' contained autoclaved sediment and river water, respectively, and were amended with 200 µM ibuprofen. Values are the arithmetic means of three replicate incubations. Red and blue-headed arrows indicate sampling of the sediment for nucleic acids extraction after third and fifth re-spiking, respectively. Error bars indicating standard deviations are smaller than the size of the symbols and therefore not apparent.

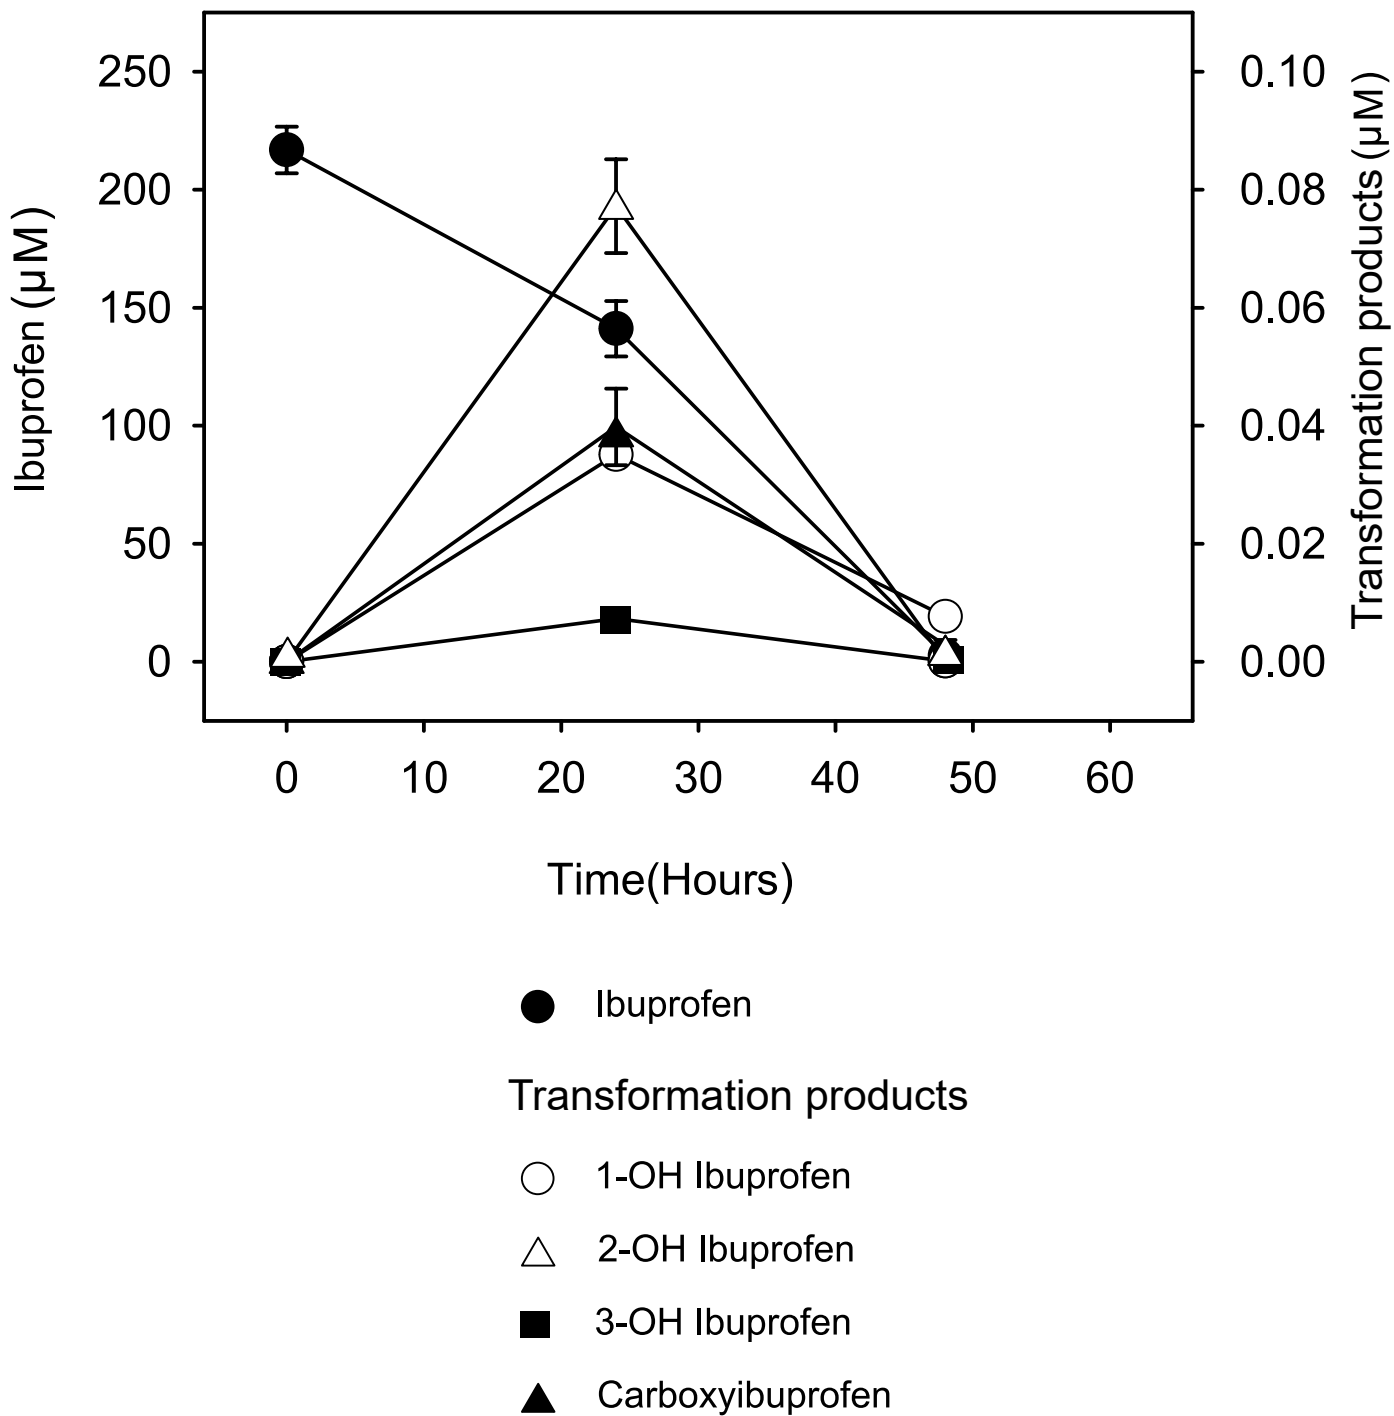

**Figure S2:** Ibuprofen transformation products in oxic hyporheic zone sediment microcosms amended with 200  $\mu\text{M}$  of ibuprofen (4th respire; see Fig. 1 B). Values are the arithmetic mean of three replicate incubations, and error bars indicate standard deviations. Some standard deviations are smaller than the symbol size and therefore not apparent.

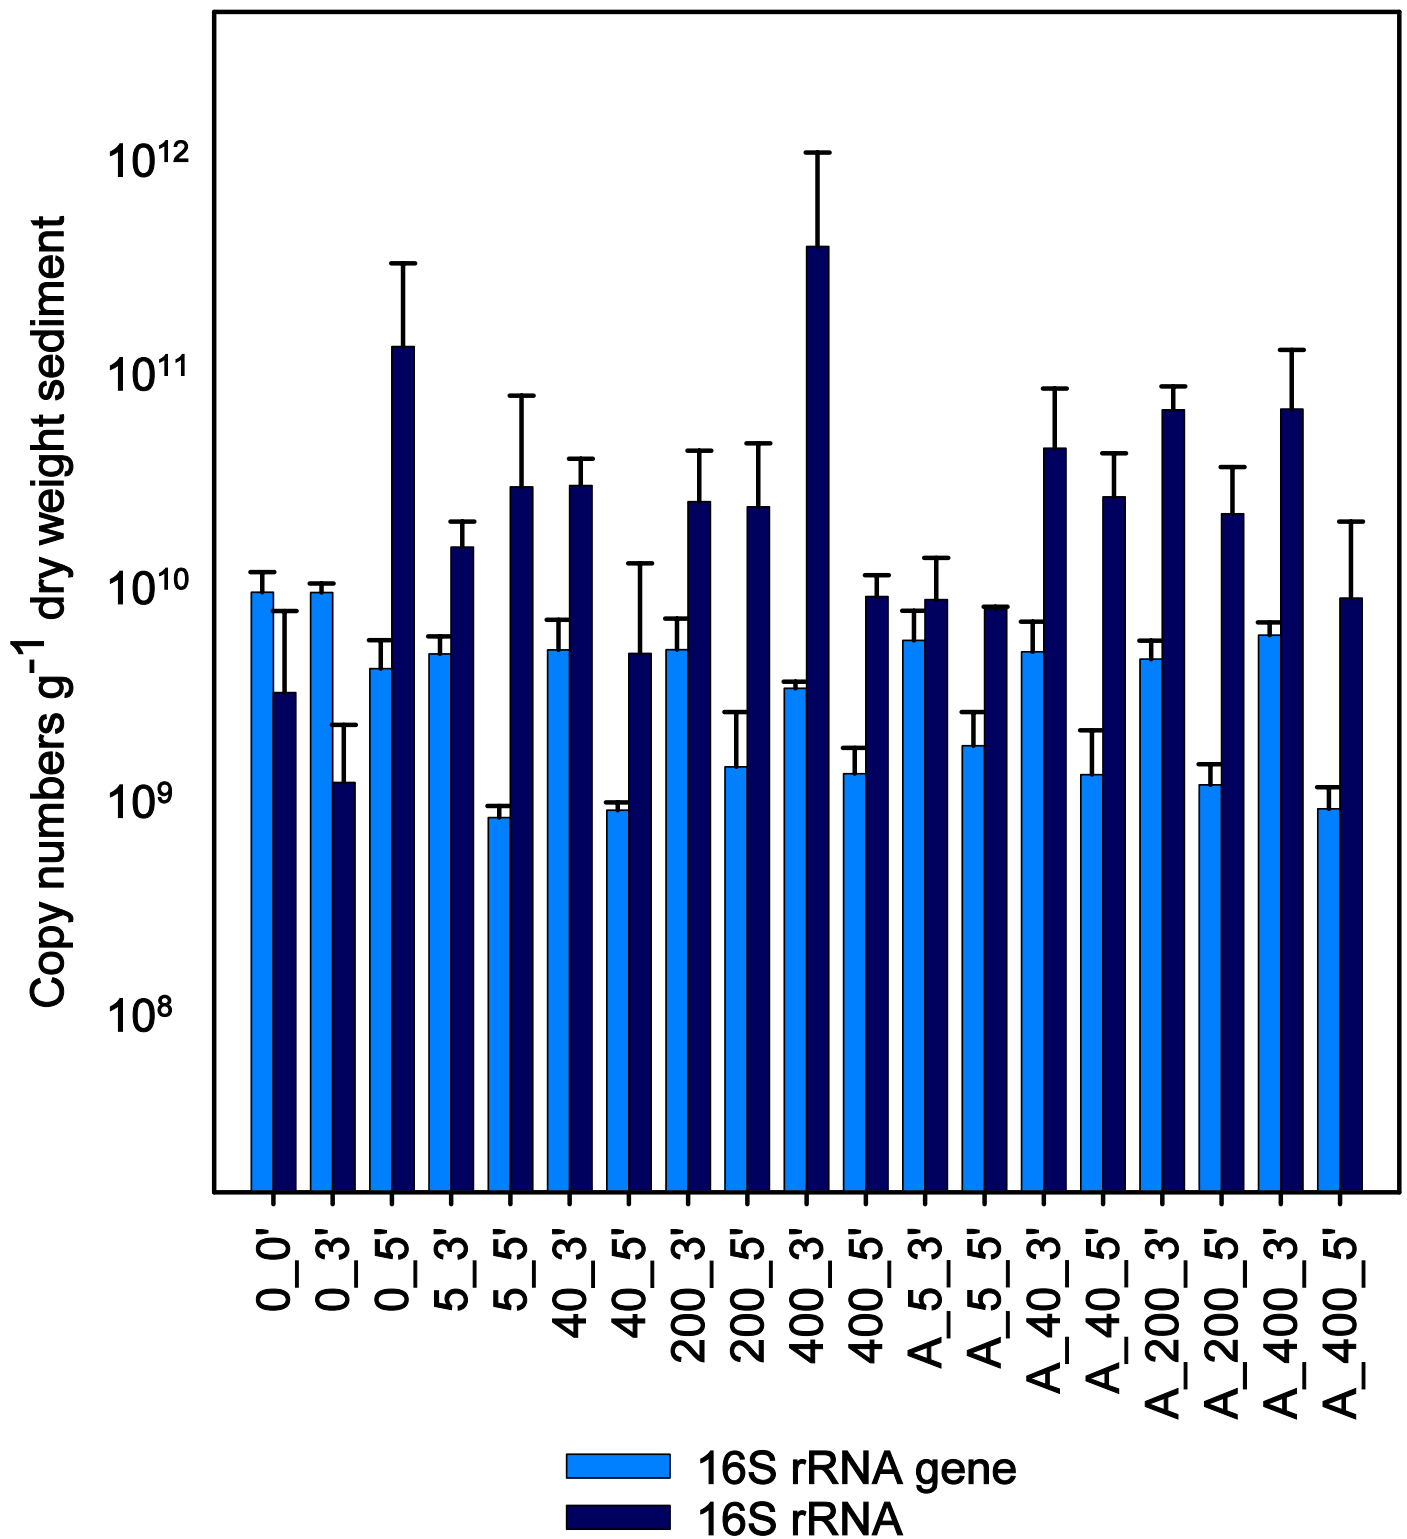

**Figure S3:** Copy numbers of the 16S rRNA gene and 16S rRNA detected in total bacterial community. Sample code: A, amended with 1 mM acetate and ibuprofen per feeding; 0, 5, 40, 200, and 400, indicate supplemental ibuprofen concentrations of 0 μM, 5 μM, 40 μM, 200 μM and 400 μM, respectively, given per feeding; 0', 3', and 5', correspond to samples obtained at the start of the incubation, and after the third and fifth refeeding, respectively. Sampling times for unamended controls were according to those of the 400 μM ibuprofen treatment. Values are the arithmetic average of three replicates. Error bars indicate standard deviation values.

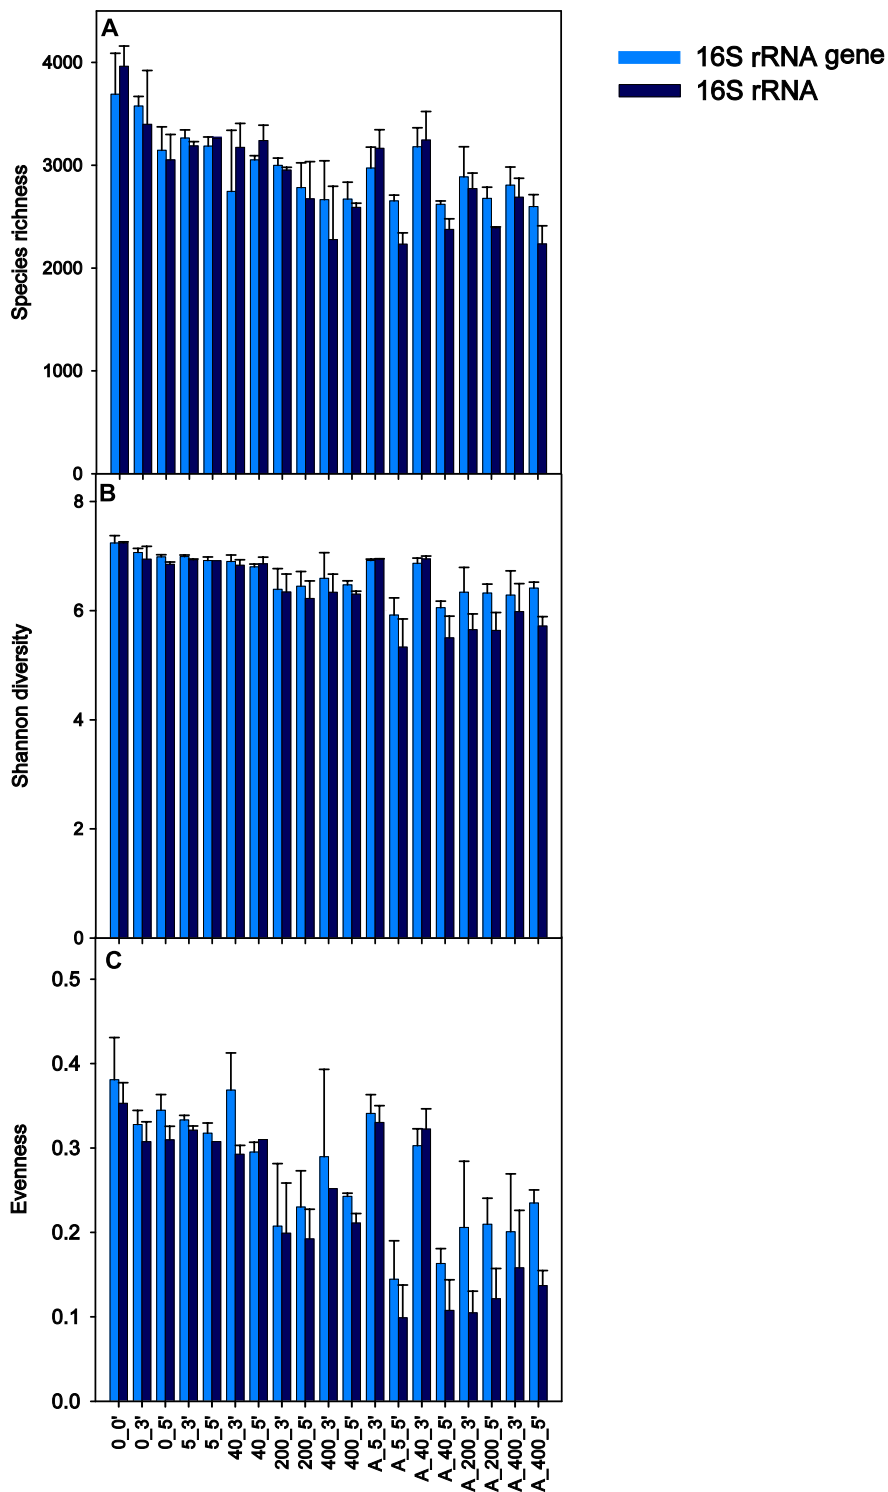

**Figure S4:** Alpha diversity and richness estimators of 16S rRNA gene and 16S rRNA obtained from Illumina amplicon sequencing. Sample code: A, amended with 1 mM acetate and ibuprofen per feeding; 0, 5, 40, 200, and 400, indicate supplemental ibuprofen concentrations of 0  $\mu$ M, 5  $\mu$ M, 40  $\mu$ M, 200  $\mu$ M and 400  $\mu$ M, respectively, given per feeding; 0', 3', and 5', correspond to samples obtained at the start of the incubation, and after the third and fifth refeeding, respectively. Sampling times for unamended controls were according to those of the 400  $\mu$ M ibuprofen treatment. Values are the arithmetic average of three replicates. Error bars indicate standard deviation values.

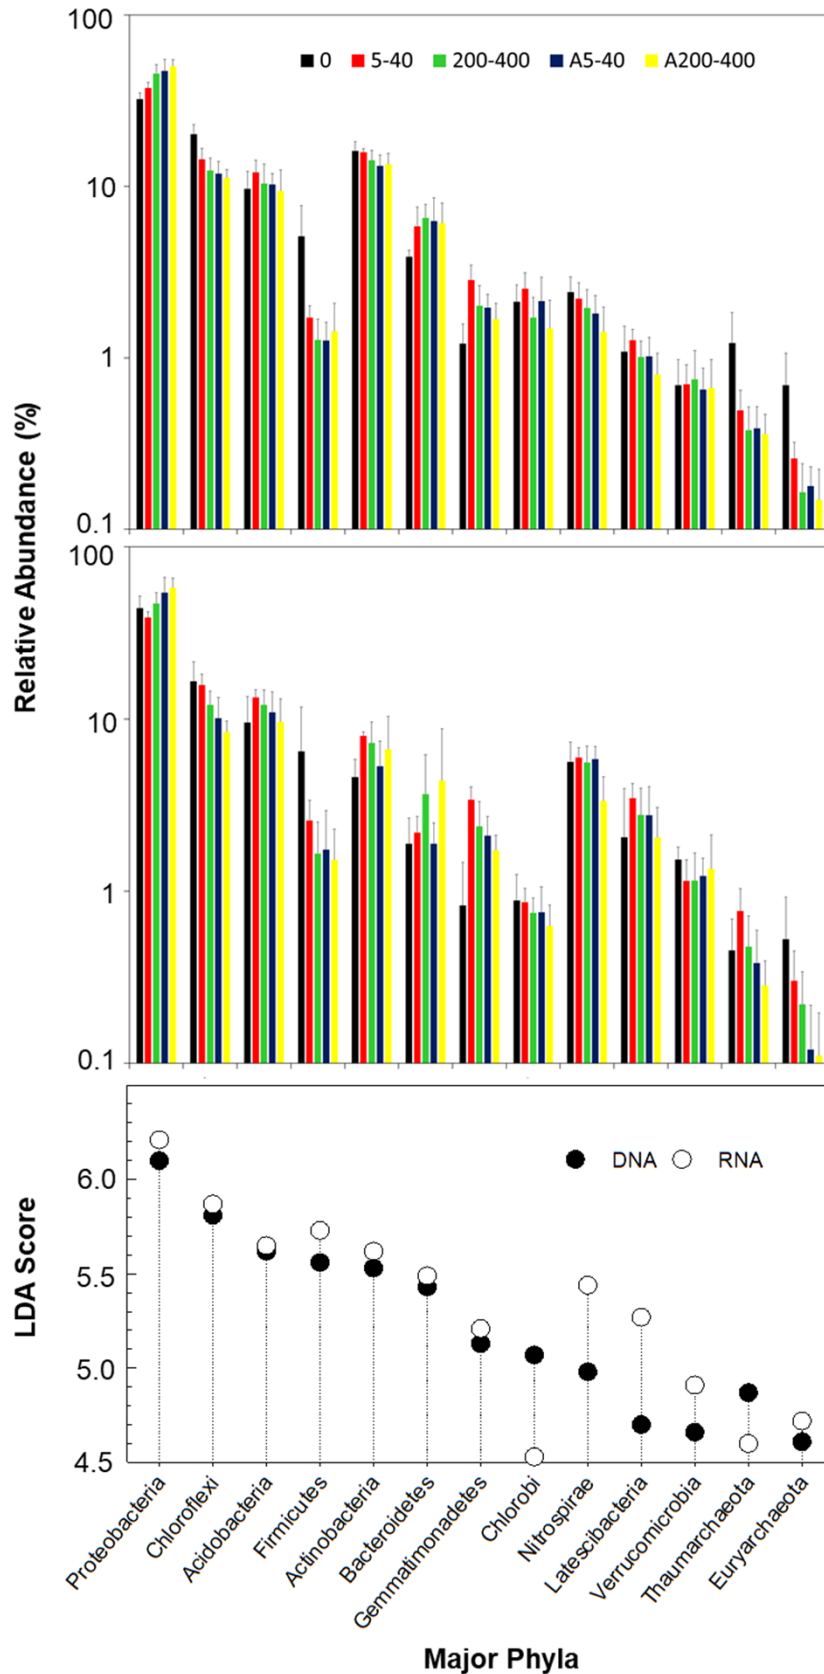

**Figure S5:** Relative abundance of major bacterial (greater than 1% relative abundance) and archaeal phyla on DNA (A) and RNA (cDNA, B) level, as well as corresponding LDA scores (C). Archaea are indicated by the grey box. Values and error bars represent means from all time points per treatment (see Figures. 1, S1) of up to 12 samples and standard deviation, respectively. 0, unamended controls; 5-40, 'low ibuprofen treatments' with 5 and 40  $\mu\text{M}$  ibuprofen; 200-400, 'high ibuprofen treatments' with 200 and 400  $\mu\text{M}$  ibuprofen; A5-40, 'low ibuprofen treatments' with supplemental 1 mM acetate; A200-400, 'high ibuprofen treatments' with supplemental 1 mM acetate. Filled and open circles, DNA and RNA (cDNA) level, respectively.

**A**

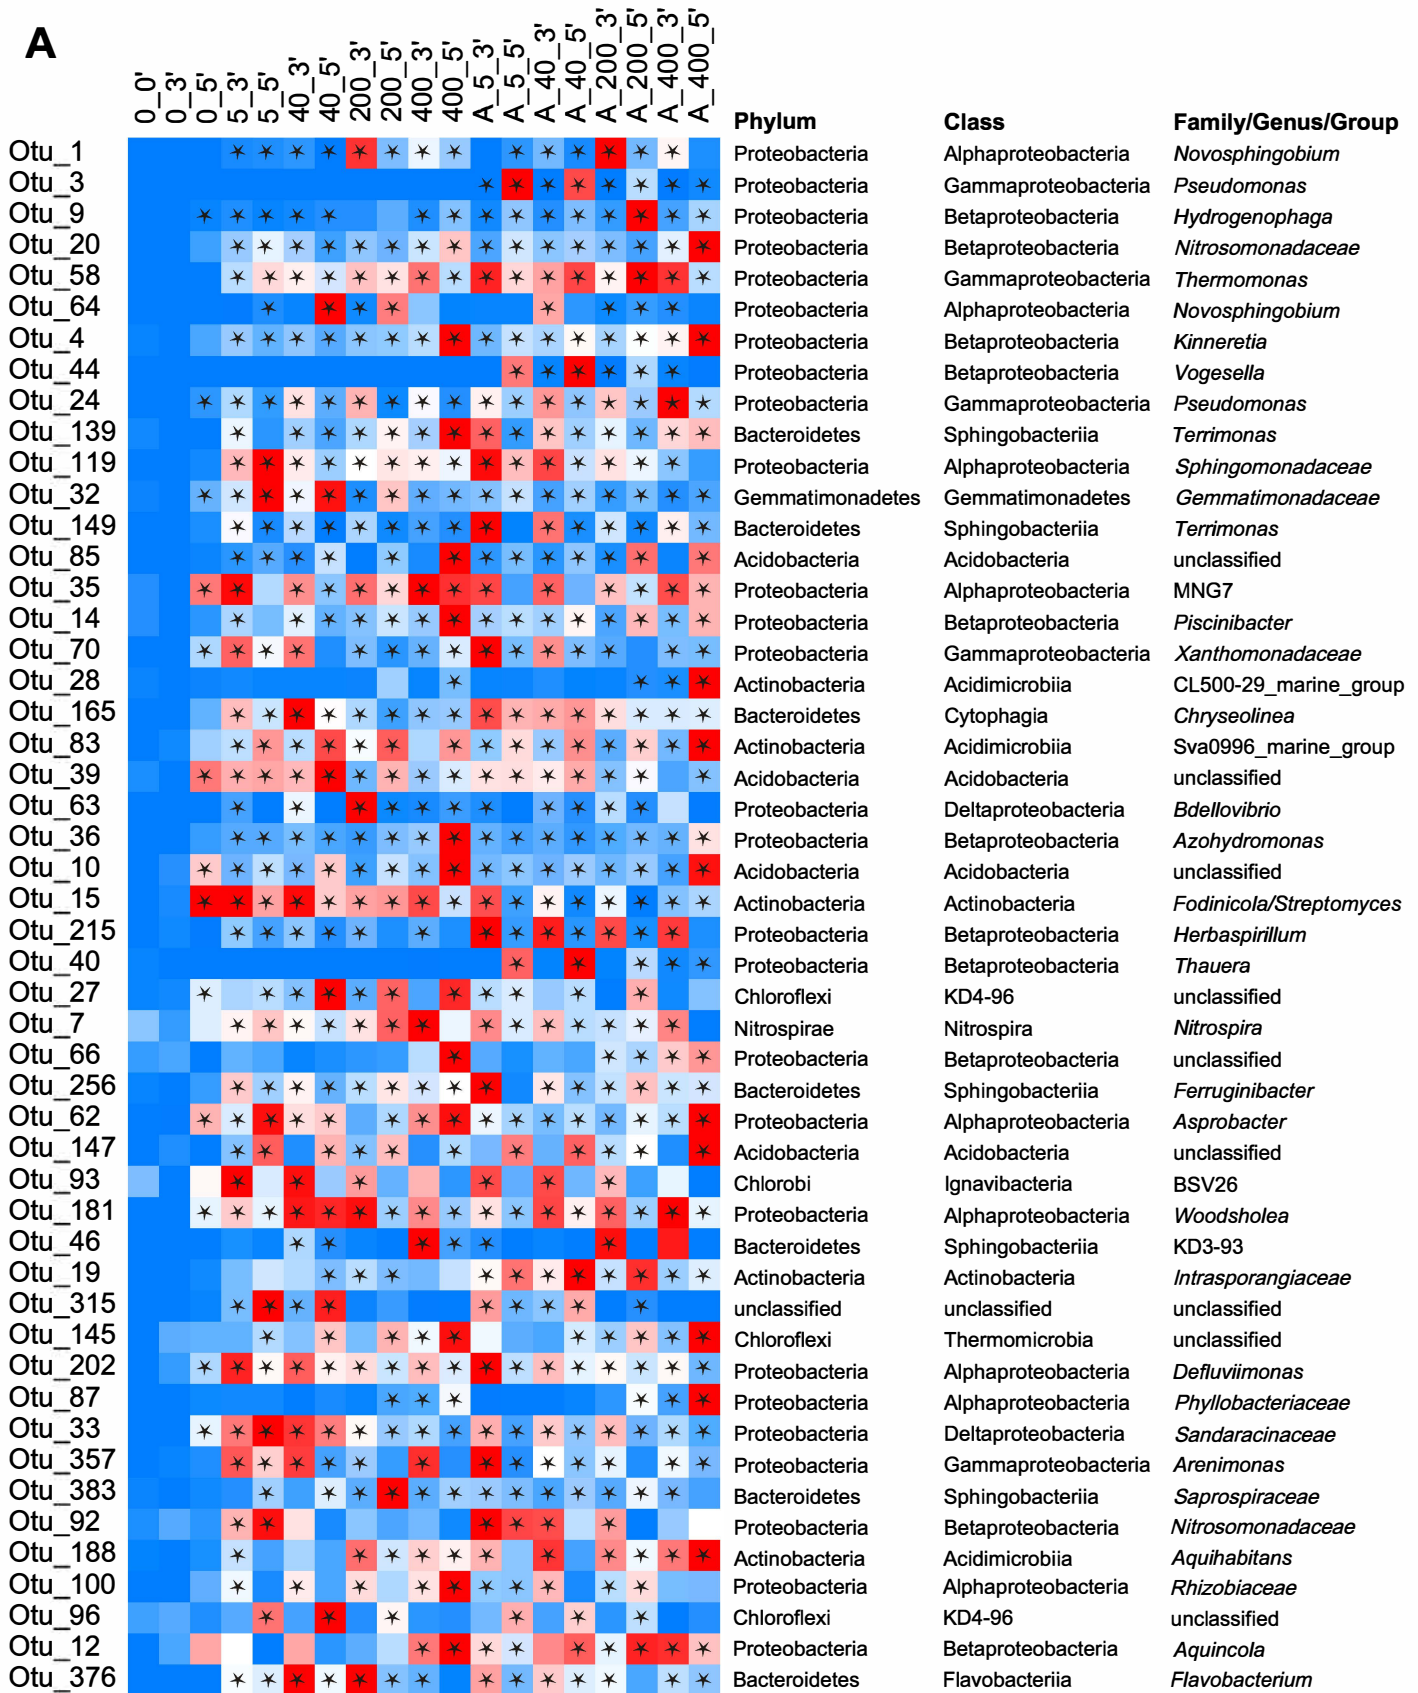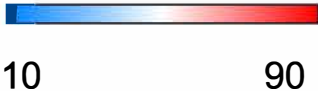

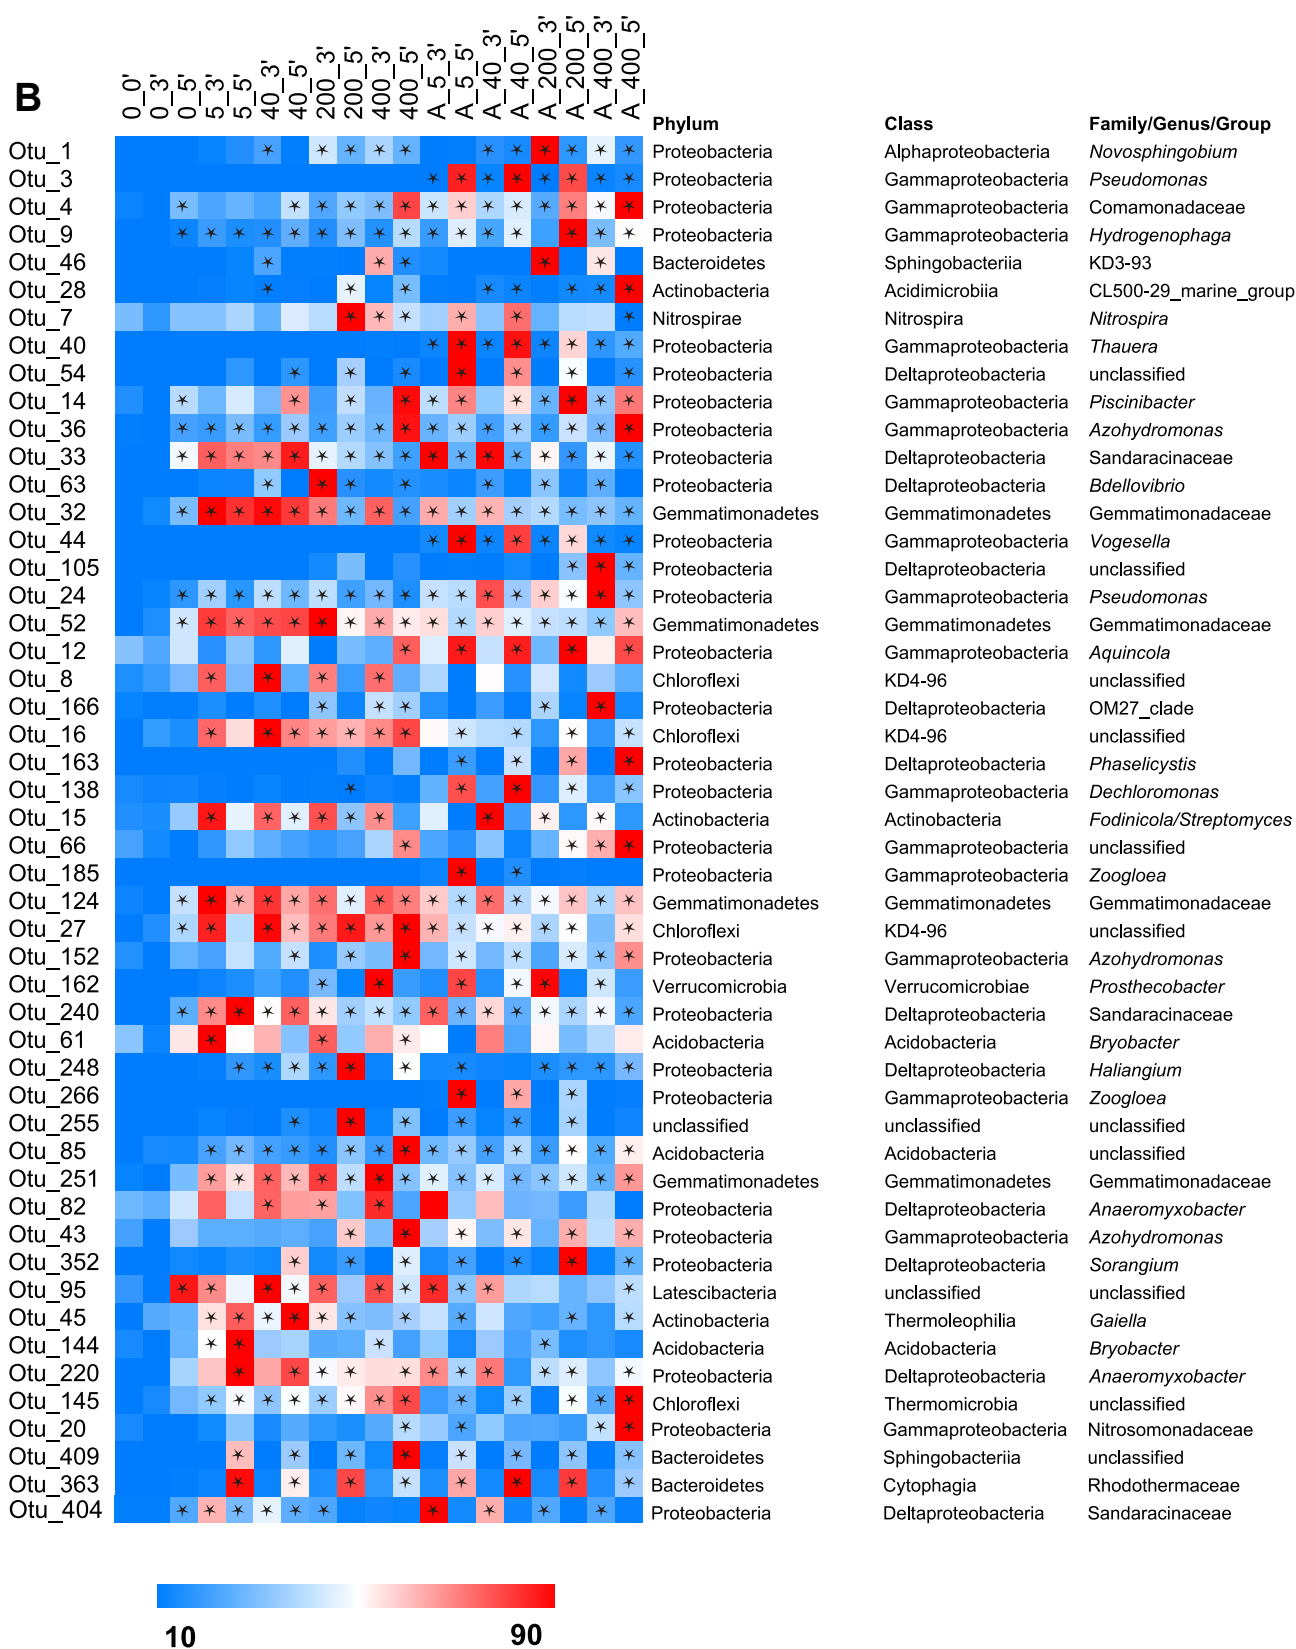

**Figure S6:** Heat map of LEfSe identified top 50 most differentially abundant taxa based on 16S rRNA gene (A) and 16S rRNA (cDNA; B) amplicon analysis after the third and fifth refeeding (Figure. 1). OTUs are sorted according to the difference in their mean read counts in ibuprofen amended and unamended samples. OTUs with a linear discriminant analysis score of  $\geq 4$  and their phylogenetic affiliation are shown. The color code reflects median, as well as upper and lower quantiles of read counts normalized to the total number of reads per OTU from all samples. Sample code: A, amended with 1 mM acetate and ibuprofen per feeding; 0, 5, 40, 200, and 400 indicate supplemental ibuprofen concentrations in  $\mu\text{M}$  given per feeding; 0', 3', and 5' correspond to samples obtained at the start of the incubation, and after the third and fifth refeeding, respectively. Sampling times for unamended controls were according to those of the 400  $\mu\text{M}$  ibuprofen treatment. \*, Samples with significant differential relative abundance compared to the start of the incubation based on DESeq2 (adj  $p < 0.1$ ).

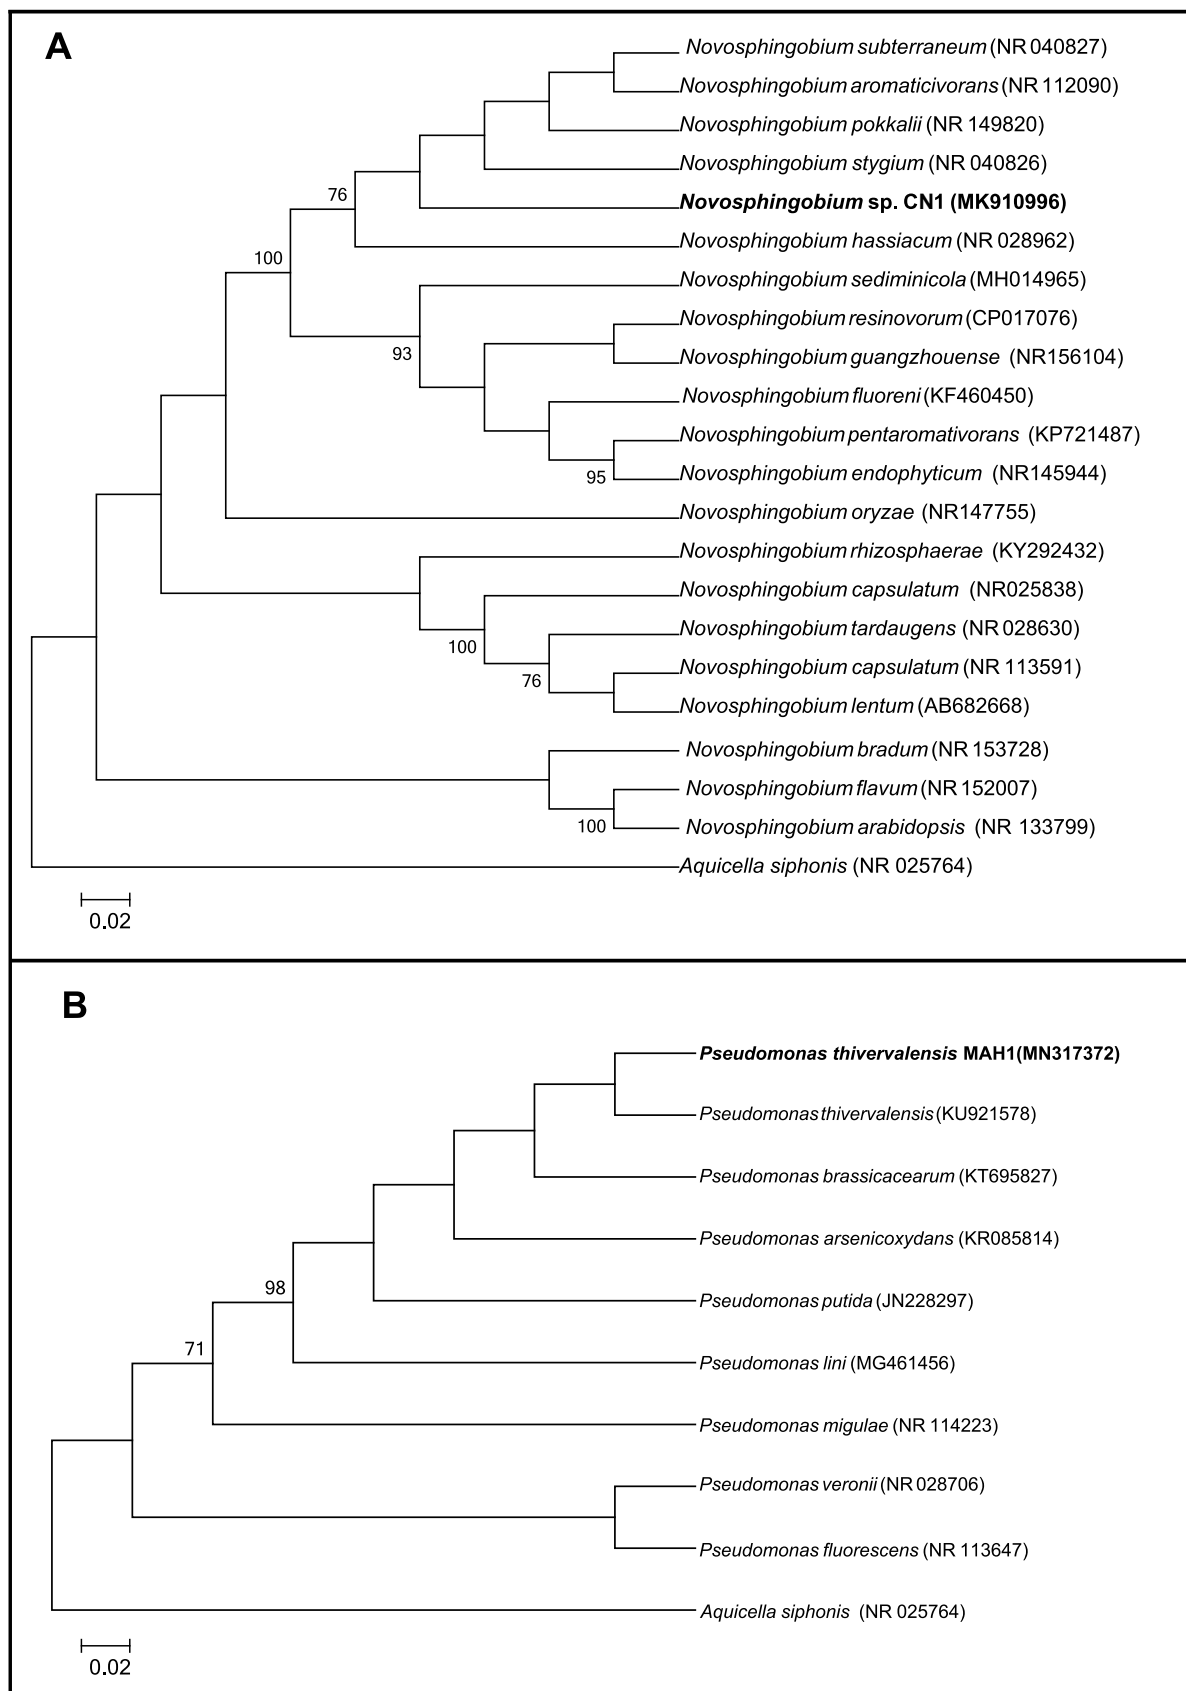

**Figure S7:** Phylogenetic tree reconstructed with the neighbour-joining method based on 16S rRNA gene sequences of strain CN1 and other *Novosphingobium* species (panel A) and strain MAH1 and other *Pseudomonas* species (panel B), showing their position among phylogenetic neighbours. *Aquicella siphonis* strain SGT-108 was used as an outgroup. Bootstrap values (based on 1000 replicati ons) above 70 % are shown at branch nodes.



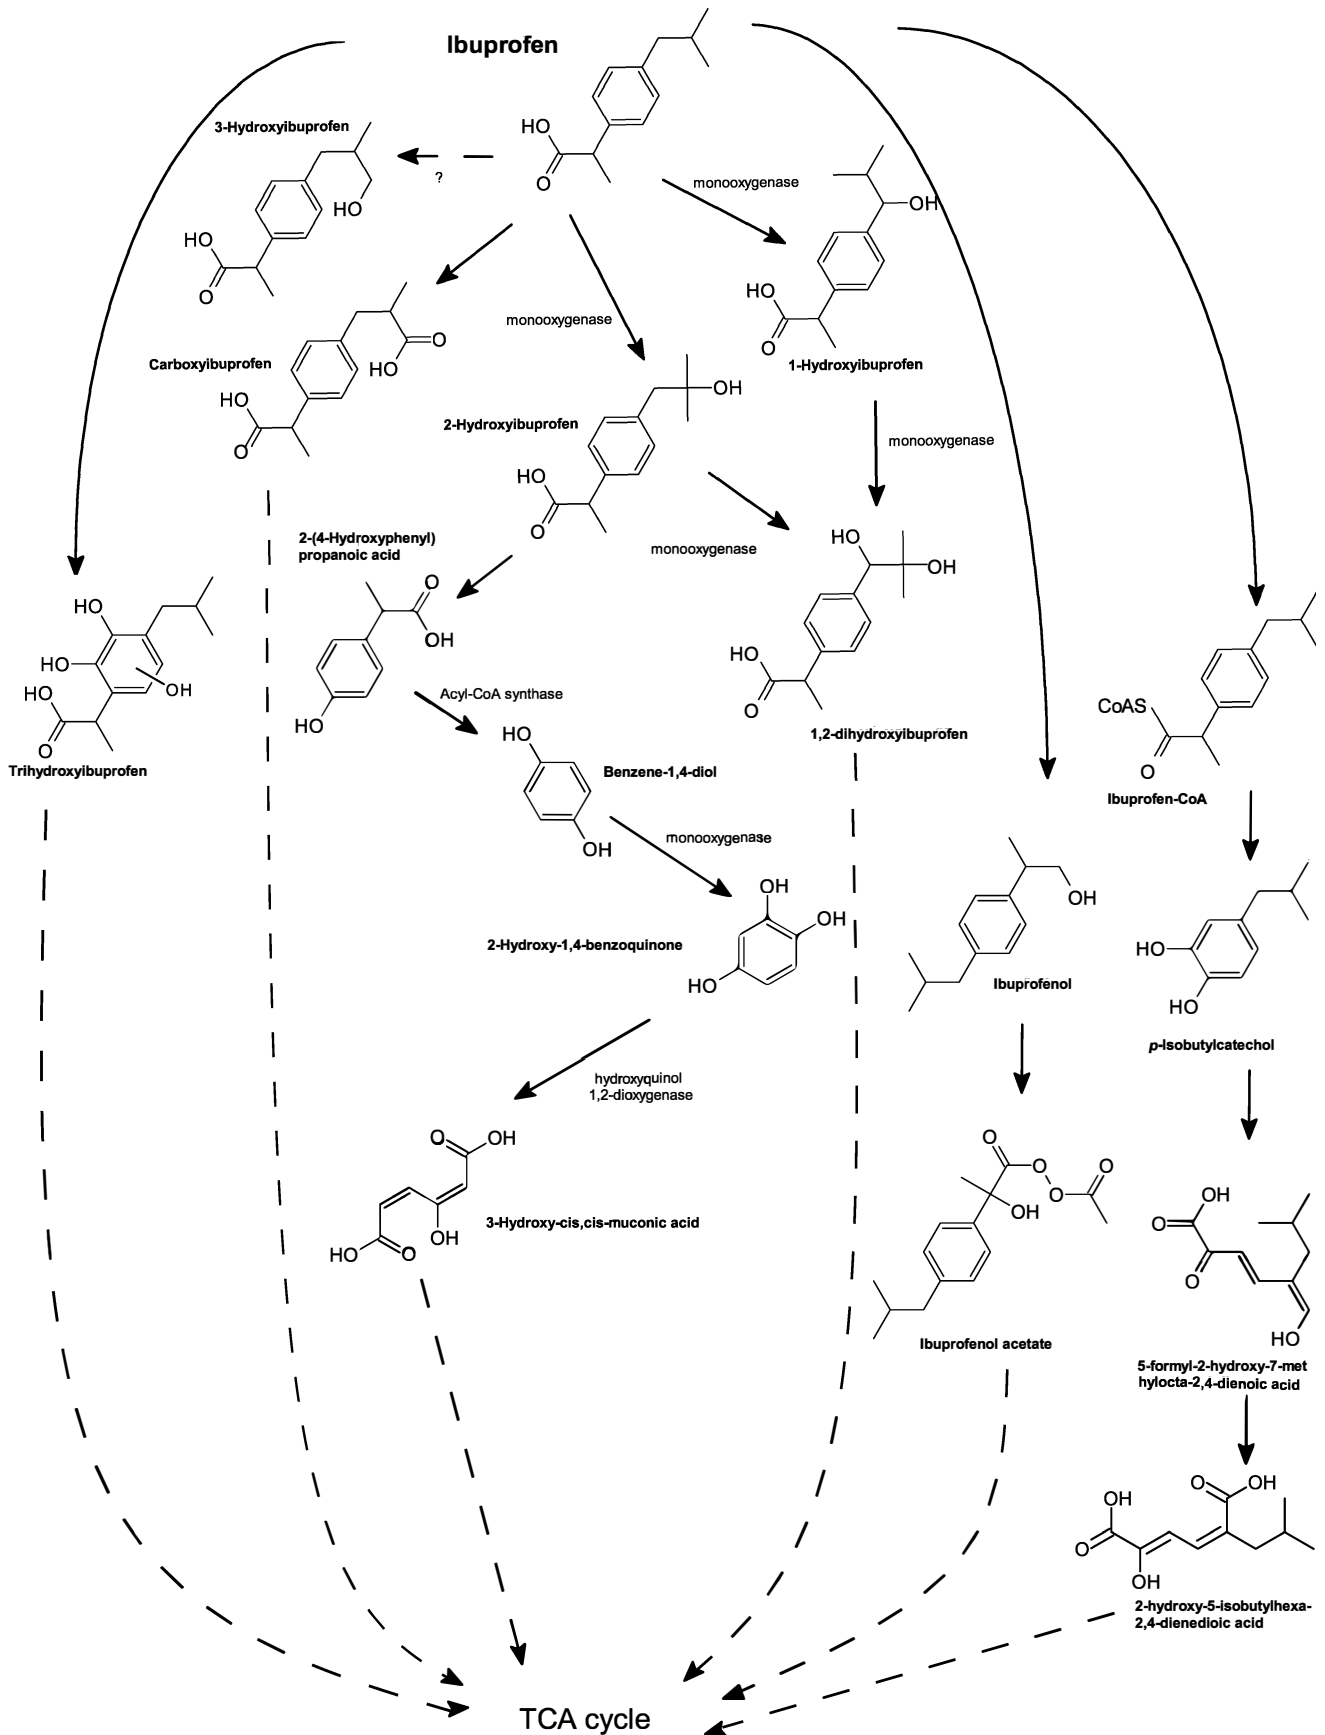

**Figure. S8:** Hypothetical ibuprofen degradation pathways in oxic hyporheic zone sediments based on transformation products identified in this study and previous studies as compiled in Žur et al. [48].

**Table S1.** Sequences and annealing temperature of primer sets targeting representative ibuprofen-responsive taxa (400  $\mu$ M ibuprofen treatment; Figure 4, Table S2). The primers were used to amplify the 16S rRNA gene and corresponding 16S rRNA transcripts (cDNA).

| Target taxa<br>(representative OTUs from amplicon libraries<br>included in the groups targeted) | Primer name | Primer sequence                  | Annealing temperature | Reference               |
|-------------------------------------------------------------------------------------------------|-------------|----------------------------------|-----------------------|-------------------------|
| Actinobacteria<br>(OTU 28)                                                                      | HGC236F     | 5'-GCG GCC TAT CAG CTT GTT-3'    | 55.5°C                | Warnecke et al.<br>[33] |
|                                                                                                 | HGC664R     | 5'-AGG AAT TCC AGT CTC CCC-3'    |                       |                         |
| <i>Sphingomonadaceae</i><br>(OTU 1)                                                             | SPF         | 5'-AAG TCA GAG GTG AAA GCC CG-3' | 58°C                  | This study              |
|                                                                                                 | SPR         | 5'-TTG TCC AGT CAG TCG CCT TC-3' |                       |                         |
| Acidobacteria Subgroup17/Unclassified<br>(OTU 39)                                               | S17F        | 5'-TTG TCC AGT CAG TCG CCT TC-3' | 58°C                  | This study              |
|                                                                                                 | S17R        | 5'-TCA AGC CTG CTA GTT TCC CG-3' |                       |                         |
| <i>Hydrogenophaga</i><br>(OTU 9)                                                                | HYF         | 5'-GCC TTC GGG TTG TAA ACT GC-3' | 58°C                  | This study              |
|                                                                                                 | HYR         | 5'-AAA CGC CAT TCC CAG GTT GA-3' |                       |                         |
| <i>Fodinicola</i><br>(OTU 15)                                                                   | FDF         | 5'-CCT CTT TCA GCA GGG ACG AA-3' | 58°C                  | This study              |
|                                                                                                 | FDR         | 5'-AAG TCT GCC CGT ATC GAG TG-3' |                       |                         |
| Chloroflexi/Unclassified<br>(OTU 16)                                                            | CHF         | 5'-TCG GGA ATT TTG CGC AAT GG-3' | 58°C                  | This study              |
|                                                                                                 | CHR         | 5'-CCT GCC TTC GAG TCG ATC AG-3' |                       |                         |
| Gemmatimonadetes/Unclassified<br>(OTU 32)                                                       | GMF         | 5'-AAA CCA CTG TCG GAA GGG AC-3' | 58°C                  | This study              |
|                                                                                                 | GMR         | 5'-CGA GCC TGG CAG TCT AGA AG-3' |                       |                         |

**Table S2.** Classification of bacterial OTUs enriched by ibuprofen relative to unamended controls sampled at the same time point, and closest cultured relatives of OTU representative 16S rRNA gene sequences. Significant ( $p\text{-adj} < 0.05$ ) Log<sub>2</sub>-fold change  $> 0$  are reported as determined by Deseq2. IBU40 and IBU400, ibuprofen amendment with 40 and 400  $\mu\text{M}$  ibuprofen, respectively. IBA40 and IBA400, ibuprofen amendment with 40 and 400  $\mu\text{M}$  ibuprofen, respectively, together with 1 mM acetate.

| Phylum/Subphylum-level | Genus-level (OTU No.)       | Closest cultured relative        | Acc. No. <sup>a</sup> | [%] <sup>b</sup> | Log <sub>2</sub> -fold change |                 |           |       |        |           |       |           |  |       |        |
|------------------------|-----------------------------|----------------------------------|-----------------------|------------------|-------------------------------|-----------------|-----------|-------|--------|-----------|-------|-----------|--|-------|--------|
|                        |                             |                                  |                       |                  | 16S rRNA genes                |                 |           |       |        | 16S RNA   |       |           |  |       |        |
|                        |                             |                                  |                       |                  | - Acetate                     |                 | + Acetate |       |        | - Acetate |       | + Acetate |  |       |        |
|                        |                             |                                  |                       |                  | IBU40                         | IBU400          |           | IBA40 | IBA400 |           | IBU40 | IBU400    |  | IBA40 | IBA400 |
| Acidobacteria          | <i>Bryobacter</i> (144)     | <i>Bryobacter aggregatus</i>     | AM 887762             | 92               | 2.1                           | -- <sup>c</sup> |           | --    | --     |           | 2.1   | 2.3       |  | 1.8   | --     |
|                        | <i>Bryobacter</i> (61)*d    | <i>Paludibaculum fermentans</i>  | NR_134120             | 93               | --                            | --              |           | --    | --     |           | 1     | 2.0       |  | 1.8   | 1.4    |
|                        | <i>Bryobacter</i> (115)     | <i>Bryobacter aggregatus</i>     | AM887762              | 90               | --                            | --              |           | --    | --     |           | 2.1   | --        |  | 1.5   | --     |
|                        | <i>Bryobacter</i> (562)     | <i>Bryobacter aggregatus</i>     | AM887762              | 90               | --                            | --              |           | --    | --     |           | --    | 2.5       |  | --    | 2.5    |
|                        | Uncultured subgroup_3 (901) | <i>Paludibaculum fermentans</i>  | NR_134120             | 93               | --                            | --              |           | --    | --     |           | --    | 3.3       |  | 2.7   | 3.8    |
|                        | Uncultured subgroup_3 (55)  | <i>Paludibaculum fermentans</i>  | NR_134120             | 94               | --                            | --              |           | --    | --     |           | --    | 1.5       |  | --    | 3.3    |
|                        | Uncultured subgroup_3 (516) | <i>Paludibaculum fermentans</i>  | NR_134120             | 93               | --                            | --              |           | --    | --     |           | --    | 2.2       |  | --    | 1.5    |
|                        | <i>Blastocatella</i> (126)  | <i>Blastocatella fastidiosa</i>  | NR_118350             | 95               | 1.3                           | --              |           | --    | --     |           | --    | --        |  | --    | --     |
|                        | Uncultured subgroup_6 (85)  | <i>Vicinamibacter silvestris</i> | CP011998              | 87               | 3.9                           | --              |           | 2.6   | --     |           | --    | 4.4       |  | --    | --     |
|                        | Uncultured subgroup_6 (10)  | <i>Vicinamibacter silvestris</i> | NR_151905             | 92               | 1.9                           | --              |           | --    | --     |           | 2.6   | 2.1       |  | --    | --     |
|                        | Uncultured subgroup_6 (212) | <i>Vicinamibacter silvestris</i> | NR_151905             | 90               | --                            | --              |           | --    | --     |           | 3.6   | 3.7       |  | 3     | 2.5    |
|                        | Uncultured subgroup_6 (304) | <i>Luteitalea pratensis</i>      | NR_156918             | 91               | 2.6                           | --              |           | --    | --     |           | 2.9   | --        |  | --    | --     |
|                        | Uncultured subgroup_6 (401) | <i>Luteitalea pratensis</i>      | NR_156918             | 93               | --                            | --              |           | --    | --     |           | 2.8   | 2.9       |  | --    | --     |

|                |                                      |                                      |           |     |     |     |     |     |     |     |     |     |     |
|----------------|--------------------------------------|--------------------------------------|-----------|-----|-----|-----|-----|-----|-----|-----|-----|-----|-----|
|                | Uncultured subgroup_6 (581)          | <i>Vicinamibacter silvestris</i>     | NR_151905 | 93  | --  | --  | --  | --  | --  | 2.9 | --  | --  | 2.7 |
|                | Uncultured subgroup_6 (412)          | <i>Vicinamibacter silvestris</i>     | NR_151905 | 91  | --  | --  | --  | --  | 3.1 | 2.7 | --  | --  | --  |
|                | Uncultured subgroup_6 (147)          | <i>Ralstonia solanacearum</i>        | CP011998  | 90  | 1.9 | 2.0 | --  | --  | --  | --  | --  | --  | --  |
|                | Uncultured subgroup_6 (85)           | <i>Ralstonia solanacearum</i>        | CP011998  | 90  | --  | --  | --  | --  | --  | 4.4 | --  | --  | --  |
|                | Uncultured subgroup_17 (39)          | <i>Vicinamibacter silvestris</i>     | NR_151905 | 88  | 3.1 | 2.2 | 2.6 | 1.7 | 1.7 | 2   | 1.6 | --  | --  |
|                | Uncultured subgroup_22 (329)         | <i>Anaeromyxobacter dehalogenans</i> | NR_074927 | 86  | 3.3 | --  | --  | --  | 4.4 | 2.8 | 3.9 | --  | --  |
|                | Uncultured subgroup_22 (340)         | <i>Thermaerobacter marianensis</i>   | NR_074944 | 86  | --  | --  | --  | --  | 3.1 | --  | --  | 2   | --  |
|                | Uncultured subgroup_22 (57)          | <i>Vicinamibacter silvestris</i>     | NR_151905 | 85  | 1.8 | 2   | --  | --  | 2.2 | 3.2 | 2.6 | 2.2 | --  |
|                |                                      |                                      |           |     |     |     |     |     |     |     |     |     |     |
| Actinobacteria | Uncultured Sva0996_marine_group (83) | <i>Acidimicrobium ferrooxidans</i>   | NR_074390 | 92  | 2.1 | --  | --  | --  | 2.6 | --  | 2.2 | 2   | --  |
|                | <i>Aeromicrobium</i> (332)           | <i>Aeromicrobium panaciterrae</i>    | NR_041382 | 100 | 4   | --  | --  | --  | --  | --  | --  | --  | --  |
|                | <i>Marmoricola</i> (69)              | <i>Marmoricola pocheonensis</i>      | NR_108597 | 99  | 1.9 | --  | --  | --  | --  | --  | --  | --  | --  |
|                | <i>Nocardioides</i> (372)            | <i>Nocardioides intraradicalis</i>   | NR_152019 | 97  | 2.6 | 2.9 | 2.5 | --  | --  | --  | --  | --  | --  |
|                | <i>Nocardioides</i> (210)            | <i>Nocardioides sediminis</i>        | NR_044228 | 100 | 1.9 | --  | --  | --  | 2.9 | --  | --  | --  | --  |
|                | <i>Nocardioides</i> (102)            | <i>Nocardioides islandensis</i>      | NR_044235 | 96  | --  | 1.7 | 1.6 | 1.8 | --  | --  | --  | --  | --  |
|                | Uncultured MB-A2-108 (94)            | <i>Kitasatospora kazusensis</i>      | NR_041539 | 92  | --  | --  | --  | --  | --  | 3.7 | 3.3 | 2.9 | --  |

|                                    |                                          |           |     |    |     |  |     |     |  |     |     |  |     |     |
|------------------------------------|------------------------------------------|-----------|-----|----|-----|--|-----|-----|--|-----|-----|--|-----|-----|
| <i>Iamia</i> (188)                 | <i>Aquihabitans daechungensis</i>        | NR_132289 | 99  | -- | 2.7 |  | 2.8 | 2.9 |  | 2.5 | 3.7 |  | 3   | 3.7 |
| <i>Iamia</i> (362)                 | <i>Iamia majanohamensis</i>              | NR_041634 | 94  | -- | --  |  | --  | --  |  | 3.3 | --  |  | --  | --  |
| Uncultured Acidimicrobiales (1265) | <i>Aciditerrimonas ferrireducens</i>     | NR_112972 | 94  | -- | --  |  | --  | 4.2 |  | --  | --  |  | --  | 4.8 |
| Uncultured 480-2(627)              | <i>Solirubrobacter phytolaccae</i>       | NR_133858 | 90  | -- | --  |  | --  | --  |  | 3.6 | --  |  | 3.5 | --  |
| <i>Solirubrobacter</i> (29)        | <i>Solirubrobacter ginsenosidimutans</i> | NR_108192 | 99  | -- | --  |  | --  | --  |  | 2.8 | --  |  | --  | --  |
| Sva0996_marine_group(441)          | <i>Acidimicrobium ferrooxidans</i>       | NR_074390 | 91  | -- | --  |  | --  | --  |  | 2.9 | --  |  | --  | --  |
| <i>Flavobacterium</i> (633)        | <i>Flavobacterium cheniae</i>            | NR_044198 | 97  | -- | 5.3 |  | 5.4 | 6.7 |  | --  | --  |  | --  | --  |
| <i>Flavobacterium</i> (2394)       | <i>Flavobacterium cheonhonense</i>       | NR_125552 | 100 | -- | 4.9 |  | --  | 4.7 |  | --  | --  |  | --  | --  |
| Uncultured NS9_marine_group (438)  | <i>Vicingus serpentipes</i>              | NR_159281 | 87  | -- | 3.1 |  | --  | 3.6 |  | --  | --  |  | --  | 4.1 |
| Uncultured NS9_marine_group (277)  | <i>Phaeocystidibacter marisrubri</i>     | NR_136475 | 86  | -- | 3.2 |  | --  | 3.6 |  | --  | 3.1 |  | --  | 3.5 |
| <i>Rhodococcus</i> (459)           | <i>Rhodococcus koreensis</i>             | LT838098  | 100 | -- | 4.4 |  | --  | 4.5 |  | 4.3 | 4.3 |  | 3.7 | 5.4 |
| <i>Fodinicola</i> (15)             | <i>Streptomyces aomiensis</i>            | NR_112998 | 97  | -- | 1.4 |  | --  | 1   |  | 1.3 | 1.8 |  | 1.8 | 1.6 |

|                 |                                           |                                          |           |    |     |     |  |     |     |  |     |     |  |     |     |
|-----------------|-------------------------------------------|------------------------------------------|-----------|----|-----|-----|--|-----|-----|--|-----|-----|--|-----|-----|
|                 | <i>Nocardioides</i> (405)                 | <i>Nocardioides opuntiae</i>             | NR_133796 | 97 | --  | 3.9 |  | 3.8 | 3.4 |  | --  | --  |  | --  | --  |
|                 | Uncultured Acidimicrobiales (612)         | <i>Ilumatobacter nonamiensis</i>         | NR_112713 | 92 | --  | --  |  | 4.1 | --  |  | --  | --  |  | 3.7 | 3.7 |
|                 | Uncultured Actinobacteria (359)           | <i>Longivirga aurantiaca</i>             | NR_159886 | 91 | --  | 2.8 |  | --  | 2.9 |  | --  | --  |  | --  | --  |
|                 | Uncultured MB-A2-108 (137)                | <i>Streptacidiphilus hamsterleyensis</i> | NR_133867 | 90 | 1.7 | 1.8 |  | --  | --  |  | 3.3 | 4   |  | 3.2 | --  |
|                 | CL500-29_marine_group (28)                | <i>Ilumatobacter nonamiensis</i>         | NR_112713 | 92 | --  | --  |  | --  | 2.2 |  | --  | --  |  | 1.9 | 2.1 |
|                 | Uncultured Acidimicrobiales (569)         | <i>Aciditerrimonas ferrireducens</i>     | NR_112972 | 94 | --  | --  |  | --  | --  |  | --  | --  |  | 3.2 | 3.5 |
|                 | Uncultured <i>Intrasporangiaceae</i> (19) | <i>Knoellia flava</i>                    | MG205530  | 99 | --  | --  |  | 1.3 | 1.3 |  | --  | --  |  | --  | --  |
|                 | <i>Gaiella</i> (45)                       | <i>Gaiella occulta</i>                   | NR_118138 | 97 | --  | --  |  | --  | --  |  | 1.7 | --  |  | --  | --  |
| Armatimonadetes | Uncultured Armatimonadetes (371)          | <i>Fimbriimonas ginsengisoli</i>         | NR_121726 | 88 | 4.7 | --  |  | --  | --  |  | --  | --  |  | --  | --  |
| Bacteroidetes   | <i>Chryseolinea</i> (165)                 | <i>Chryseolinea serpens</i>              | NR_108511 | 96 | 4.3 | 4   |  | 5   | 4.4 |  | --  | 3.4 |  | 3.6 | --  |
|                 | <i>Chryseolinea</i> (483)                 | <i>Chryseolinea serpens</i>              | NR_108511 | 93 | 3.4 | 4.1 |  | 4.4 | --  |  | --  | --  |  | --  | --  |
|                 | <i>Chryseolinea</i> (231)                 | <i>Chryseolinea serpens</i>              | NR_108511 | 92 | 2.6 | 2.9 |  | 3.3 | 2.5 |  | --  | --  |  | --  | --  |
|                 | <i>Chryseolinea</i> (1195)                |                                          |           |    | 3.8 | --  |  | 4.1 | --  |  | --  | --  |  | --  | --  |
|                 | Uncultured <i>Rhodothermaceae</i> (363)   | <i>Natronotalea proteilytica</i>         | NR_158101 | 88 | 4.5 | --  |  | --  | --  |  | 5.1 | --  |  | --  | --  |

|                                        |                                       |           |     |     |     |  |     |     |  |     |     |  |    |     |
|----------------------------------------|---------------------------------------|-----------|-----|-----|-----|--|-----|-----|--|-----|-----|--|----|-----|
| <i>Ferruginibacter</i> (499)           | <i>Ferruginibacter lapsinanis</i>     | NR_044589 | 96  | 3.9 | 5.5 |  | 5.4 | 6.9 |  | --  | --  |  | -- | --  |
| <i>Ferruginibacter</i> (378)           | <i>Ferruginibacter yonginensis</i>    | NR_133743 | 96  | --  | 3.1 |  | --  | --  |  | --  | --  |  | -- | --  |
| <i>Flavobacterium</i> (2394)           | <i>Flavobacterium cheonhonense</i>    | NR_125552 | 100 | --  | 6.5 |  | --  | --  |  | --  | --  |  | -- | --  |
| <i>Flavobacterium</i> (376)            | <i>Flavobacterium inkyongense</i>     | NR_156036 | 99  | 4.9 | --  |  | --  | 5.6 |  | --  | --  |  | -- | --  |
| Uncultured <i>Cytophagaceae</i> (451)  | <i>Chryseolinea serpens</i>           | NR_108511 | 91  | 4.4 | --  |  | 4.5 | --  |  | --  | --  |  | -- | --  |
| <i>Ferruginibacter</i> (256)           | <i>Ferruginibacter alkalilentus</i>   | NR_044588 | 97  | 2.5 | 2.6 |  | 3   | 3.1 |  | --  | --  |  | -- | --  |
| Uncultured <i>Saprospiraceae</i> (380) | <i>Phaeodactylibacter luteus</i>      | NR_136808 | 88  | --  | 2.9 |  | --  | 3.2 |  | --  | 2.3 |  | -- | --  |
| Uncultured <i>Saprospiraceae</i> (383) | <i>Portibacter lacus</i>              | NR_113569 | 90  | 4.4 | 3.7 |  | --  | 3.8 |  | --  | --  |  | -- | --  |
| Uncultured <i>Saprospiraceae</i> (472) | <i>Phaeodactylibacter xiamenensis</i> | NR_134132 | 88  | --  | 4.5 |  | 3.6 | 3.9 |  | --  | --  |  | -- | --  |
| Uncultured Sphingobacteriales (711)    | <i>Ferruginibacter profundus</i>      | NR_148259 | 90  | --  | 5.9 |  | 4.7 | 6.5 |  | --  | --  |  | -- | --  |
| Uncultured env.OPS_17 (726)            | <i>Lentimicrobium saccharophilum</i>  | NR_149795 | 87  | --  | 6.6 |  | --  | 7   |  | --  | --  |  | -- | 5.7 |
| Uncultured env.OPS_17 (876)            | <i>Mucilaginibacter terrae</i>        | NR_158094 | 85  | --  | 5.7 |  | 5.1 | --  |  | --  | --  |  | -- | --  |
| Uncultured env.OPS_17 (548)            | <i>Anseongella ginsenosidimitans</i>  | NR_148803 | 85  | 4.1 | --  |  | --  | --  |  | 4.3 | --  |  | -- | --  |
| Uncultured KD3-93 (46)                 | <i>Geofilum rhodophaeum</i>           | NR_158091 | 89  | --  | 7.5 |  | --  | --  |  | --  | 7.8 |  | -- | 5.4 |
| Uncultured NS11-12_marine_group (616)  | <i>Ekhidna lutea</i>                  | NR_115061 | 89  | --  | 5.3 |  | 4   | 4.9 |  | --  | --  |  | -- | --  |
| PHOS-HE51 (1186)                       | <i>Owenweeksia hongkongensis</i>      | NR_074100 | 88  | --  | 5   |  | --  | 5.3 |  | --  | --  |  | -- | --  |

|                  |                                      |                                     |           |    |     |     |  |     |     |  |     |     |  |     |     |
|------------------|--------------------------------------|-------------------------------------|-----------|----|-----|-----|--|-----|-----|--|-----|-----|--|-----|-----|
|                  | Uncultured Sphingobacteriales (409)  | <i>Ferruginibacter profundus</i>    | NR_148259 | 88 | 3.7 | --  |  | 2.8 | --  |  | 5.1 | --  |  | --  | --  |
|                  | <i>Terrimonas</i> (139)              | <i>Terrimonas lutea</i>             | NR_041250 | 98 | 2.7 | 3.5 |  | 4.3 | 4.6 |  | --  | --  |  | --  | --  |
|                  | <i>Terrimonas</i> (149)              | <i>Terrimonas soli</i>              | NR_159891 | 98 | --  | --  |  | 4.2 | 4.3 |  | --  | --  |  | --  | --  |
|                  | <i>Terrimonas</i> (253)              | <i>Terrimonas arctica</i>           | NR_134213 | 98 | --  | 2.4 |  | 2.7 | 2.4 |  | --  | --  |  | --  | --  |
|                  |                                      |                                     |           |    | --  | --  |  | --  | --  |  |     |     |  |     |     |
| Cand_div_BRC1    | Uncultured Candidate_div_BRC1 (542)  | <i>Desulfomonile limimaris</i>      | NR_025079 | 81 | --  | --  |  | --  | --  |  | 6.4 | --  |  | --  | --  |
|                  | Uncultured Candidate_div_BRC1 (1346) | <i>Desulfosalsimonas propionica</i> | NR_115678 | 80 | --  | --  |  | --  | --  |  | 5.5 | --  |  | --  | --  |
|                  |                                      |                                     |           |    |     |     |  |     |     |  |     |     |  |     |     |
| Gemmatimonadetes | Uncultured Gemmatimonadaceae (124)   | <i>Gemmatimonas phototrophica</i>   | NR_136770 | 91 | 3   | 3.9 |  | 3.8 | 3.8 |  | 4.3 | 4.6 |  | 4.4 | 3.7 |
|                  | Uncultured Gemmatimonadaceae (32)    | <i>Gemmatimonas phototrophica</i>   | NR_136770 | 86 | 2.8 | 1.7 |  | 1.5 | 1.5 |  | 3.3 | 3.2 |  | 2.6 | 2.1 |
|                  | Uncultured Gemmatimonadaceae (52)    | <i>Gemmatimonas phototrophica</i>   | NR_136770 | 85 | 2.2 | --  |  | --  | --  |  | 2.9 | 2.7 |  | 2.2 | 1.8 |
|                  | Uncultured Gemmatimonadaceae (251)   | <i>Gemmatimonas aurantiaca</i>      | NR_074708 | 85 | 4.3 | 4   |  | --  | --  |  | 3.9 | 4.5 |  | 3.2 | 2.7 |
|                  | Uncultured Gemmatimonadaceae (269)   | <i>Gemmatimonas phototrophica</i>   | NR_136770 | 91 | 3   | --  |  | --  | 3.3 |  | 5   | 5.6 |  | 5.2 | 4.6 |
|                  | Uncultured Gemmatimonadaceae (299)   | <i>Gemmatimonas aurantiaca</i>      | NR_074708 | 85 | 2.5 | --  |  | --  | --  |  | 3.5 | --  |  | 2.8 | 2.6 |
|                  | Uncultured Gemmatimonadaceae (388)   | <i>Gemmatirosa kalamazoonesis</i>   | NR_132675 | 89 | --  | --  |  | --  | --  |  | 3   | 2.7 |  | 2.3 | --  |



|             |                                         |                                             |           |    |     |     |     |     |     |     |     |     |    |    |
|-------------|-----------------------------------------|---------------------------------------------|-----------|----|-----|-----|-----|-----|-----|-----|-----|-----|----|----|
|             |                                         |                                             |           |    |     |     |     |     |     |     |     |     |    |    |
| Chlorobi    | Uncultured BSV26 (580)                  | <i>Ignavibacterium album</i>                | NR_074698 | 86 | 4.6 | --  | --  | --  | --  | --  | --  | --  | -- | -- |
|             | Uncultured BSV26 (93)                   | <i>Ignavibacterium album</i>                | NR_074698 | 82 | --  | 2.1 | 2.6 | 2   | --  | --  | 2.7 | 2.5 |    |    |
|             | Uncultured BSV26 (413)                  | <i>Ignavibacterium album</i>                | NR_074698 | 82 | --  | 4.2 | 3.6 | 3.9 | --  | --  | --  | --  |    |    |
|             | Uncultured OPB56 (740)                  | <i>Hippea maritima</i>                      | NR_119289 | 81 | --  | --  | --  | 4.9 | --  | 4.9 | 4.5 | 5.2 |    |    |
|             | Uncultured SJA-28 (284)                 | <i>Melioribacter roseus</i>                 | NR_074796 | 83 | 1.9 | --  | --  | --  | --  | --  | --  | --  |    |    |
|             |                                         |                                             |           |    |     |     |     |     |     |     |     |     |    |    |
| Chloroflexi | Uncultured <i>Caldilineaceae</i> (110)  | <i>Litorilinea aerophila</i>                | NR_132330 | 88 | --  | --  | --  | --  | 3.5 | --  | --  | --  |    |    |
|             | Uncultured KD4-96 (27)                  | <i>Dehalogenimonas alkenigignens</i>        | NR_109657 | 86 | 1.5 | --  | --  | --  | 1.6 | 1.8 | --  | --  |    |    |
|             | Uncultured <i>Anaerolineaceae</i> (233) | <i>Thermanaerotherix daxensis</i>           | NR_117865 | 88 | 2.7 | --  | --  | --  | 3.9 | --  | 2.8 | 2.5 |    |    |
|             | Uncultured <i>Anaerolineaceae</i> (611) | <i>Thermomicrobium roseum</i>               | NR_044678 | 84 | 4.3 | --  | 4.8 | 4.8 | 4.5 | --  | 3.9 | --  |    |    |
|             | Uncultured <i>Anaerolineaceae</i> (628) | <i>Bellilinea caldifistulae</i>             | NR_041354 | 84 | 3.4 | --  | --  | --  | 3.1 | --  | --  | --  |    |    |
|             | Unclassified Gitt-GS-136 (127)          | <i>Hydrogenispora ethanolica</i>            | NR_125455 | 85 | 1.8 | --  | --  | --  | 2.4 | --  | --  | --  |    |    |
|             | Uncultured KD4-96 (96)                  | <i>Hydrogenispora ethanolica</i>            | NR_125455 | 85 | 1.6 | --  | --  | --  | 2.3 | 2.1 | --  | --  |    |    |
|             | Unclassified JG30-KF-CM45 (145)         | <i>Sphaerobacter thermophilus</i>           | NR_074379 | 88 | 2.1 | 2   | --  | 2.2 | 2.8 | --  | --  | --  |    |    |
|             | Uncultured KD4-96 (8)                   | <i>Dehalogenimonas lykanthroporepellens</i> | NR_074337 | 86 | --  | --  | --  | --  | --  | 1.5 | --  | --  |    |    |
|             | Uncultured KD4-96 (16)                  | <i>Dehalogenimonas alkenigignens</i>        | JQ994267  | 86 | --  | --  | --  | --  | 1.2 | 1.3 | --  | 1.3 |    |    |

|                 |                                   |                                          |           |     |     |     |     |     |     |     |     |     |
|-----------------|-----------------------------------|------------------------------------------|-----------|-----|-----|-----|-----|-----|-----|-----|-----|-----|
| Latescibacteria | Uncultured Latescibacteria (95)   | <i>Desulfonatronum thiosulfatophilum</i> | NR_116694 | 81  | 1.8 | 2.3 | --  | --  | 5   | 4.6 | 4.1 | 3.3 |
|                 | Uncultured Latescibacteria (154)  | <i>Acidicapsa acidisoli</i>              | NR_148580 | 88  | --  | 4.6 | 4.8 | 4.3 | 4.8 | 5.4 | 4.8 | 4.3 |
|                 | Uncultured Latescibacteria (308)  | <i>Syntrophorhabdus aromaticivorans</i>  | NR_041306 | 84  | 2.6 | --  | --  | --  | 2.6 | --  | --  | --  |
|                 | Uncultured Latescibacteria (326)  | <i>Desulfopila inferna</i>               | NR_115066 | 83  | --  | --  | --  | --  | 4.2 | 4.1 | 3.9 | 3.3 |
|                 | Uncultured Latescibacteria (342)  | <i>Desulfobulbus mediterraneus</i>       | NR_025150 | 84  | --  | --  | --  | --  | 2.1 | --  | 2.3 | --  |
|                 | Uncultured Latescibacteria (453)  | <i>Desulfobulbus oligotrophicus</i>      | NR_156089 | 85  | --  | --  | --  | --  | 3   | 2.8 | 2.4 | --  |
|                 | Uncultured Latescibacteria (503)  | <i>Pseudomarcicurvus alkylphenolicus</i> | NR_114390 | 81  | --  | --  | --  | --  | 3.9 | 4.2 | 4   | 3.5 |
|                 | Uncultured Latescibacteria (534)  | <i>Thermoanaerobaculum aquaticum</i>     | NR_109681 | 83  | --  | --  | --  | --  | 4.4 | --  | 3   | --  |
|                 | Uncultured Latescibacteria (706)  | <i>Desulfotalea psychrophila</i>         | NR_028729 | 83  | --  | --  | --  | --  | 3.1 | 3.8 | 3.6 | 3.3 |
|                 | Uncultured Latescibacteria (732)  | <i>Syntrophus gentianae</i>              | NR_029295 | 82  | --  | --  | --  | --  | 4.3 | 3.9 | 4.5 | 3.9 |
|                 | Uncultured Latescibacteria (864)  | <i>Desulfobulbus oligotrophicus</i>      | NR_156089 | 85  | --  | --  | --  | --  | 4.1 | 3.6 | 3.9 |     |
|                 | Uncultured Latescibacteria (422)  | <i>Desulfotalea psychrophile</i>         | NR_028729 | 82  | --  | --  | --  | --  | 3.7 | 3.9 | 3.2 | 3.2 |
|                 | Uncultured Latescibacteria (1054) | <i>Desulfotalea psychrophila</i>         | NR_028729 | 83  | --  | --  | --  | --  | 5.5 | --  | --  | --  |
| Nitrospirae     | <i>Nitrospira</i> (7)             | <i>Nitrospira moscoviensis</i>           | NR_029287 | 98  | 1.4 | 2.7 | 1.9 | 2.4 | 1.4 | 2   | --  | 1.6 |
|                 | <i>Nitrospira</i> (23)            | <i>Nitrospira moscoviensis</i>           | NR_029287 | 94  | --  | 2.3 | 2.3 | 2.1 | 1.6 | --  | --  | --  |
|                 | <i>Nitrospira</i> (26)            | <i>Nitrospira lenta</i>                  | NR_148573 | 100 | --  | --  | 2.4 | 2.4 | --  | --  | --  | --  |

|                     |                                           |                                              |           |     |     |     |     |     |     |     |     |     |     |
|---------------------|-------------------------------------------|----------------------------------------------|-----------|-----|-----|-----|-----|-----|-----|-----|-----|-----|-----|
| Alphaproteobacteria | <i>Sphingobium</i> (17)                   | <i>Sphingobium czechense</i>                 | NR_118306 | 99  | 3.7 | --  | --  | --  | --  | --  | --  | --  | 5.4 |
|                     | <i>Hyphomicrobium</i> (60)                | <i>Hyphomicrobium facile</i>                 | NR_027610 | 98  | 1.6 | 1.8 | --  | 2   | --  | --  | --  | --  | --  |
|                     | <i>Hyphomicrobium</i> (347)               | <i>Hyphomicrobium facile</i>                 | NR_027610 | 96  | --  | --  | --  | --  | 5.2 | 4.8 | 4   | 4.9 |     |
|                     | <i>Hirschia</i> (62)                      | <i>Asprobacter aquaticus</i>                 | NR_159164 |     | 2.4 | 2.9 | 2.1 | 2.5 | --  | --  | --  | --  | --  |
|                     | <i>Novosphingobium</i> (64)               | <i>Novosphingobium fuchskuhlense</i>         | NR_118270 | 99  | 6.1 | --  | 6.1 | 3.3 | 4.4 | --  | 4.3 | --  |     |
|                     | <i>Pedomicrobium</i> (84)                 | <i>Pedomicrobium manganicum</i>              | NR_104841 | 96  | 1.7 | 1.8 | --  | 2   | --  | --  | --  | 2.3 |     |
|                     | Uncultured Rhizobiales (335)              | <i>Blastochloris viridis</i>                 | NR_117911 | 95  | 2.1 | 2.6 | --  | 2.9 | --  | --  | --  | --  | --  |
|                     | <i>Defluviimonas</i> (202)                | <i>Defluviimonas aestuarii</i>               | NR_118305 | 98  | 2.2 | 2.8 | 2.8 | 2.6 | --  | --  | --  | --  | --  |
|                     | <i>Hyphomicrobium</i> (129)               | <i>Hyphomicrobium aestuarii</i>              | NR_104954 | 96  | 2.1 | --  | --  | --  | 2.5 | --  | --  | 1.7 |     |
|                     | Uncultured AKYH478 (645)                  | <i>Lacibacterium aquatile</i>                | NR_125556 | 94  | --  | --  | --  | --  | --  | 5   | --  | --  | --  |
|                     | Uncultured F0723 (1059)                   | <i>Phreatobacter stygius</i>                 | NR_158009 | 98  | --  | --  | --  | --  | --  | 6.2 | --  | --  | --  |
|                     | Uncultured MNG7 (35)                      | <i>Nordella oligomobilis</i>                 | NR_114615 | 96  |     | 2.2 | 2   | 2.3 | --  | --  | --  | --  | --  |
|                     | Uncultured <i>Phyllobacteriaceae</i> (87) | <i>Carbophilus carboxidus</i>                | NR_104931 | 91  | --  | --  | 5.9 | --  | --  | 3.4 | --  | --  | --  |
|                     | Uncultured <i>Sphingomonadaceae</i> (1)   | <i>Novosphingobium chloroacetimidivorans</i> | NR_134105 | 99  | --  | --  | 4.6 | 6   | --  | 5.1 | 3.3 | 6.1 |     |
|                     | Uncultured <i>Sphingomonadaceae</i> (119) | <i>Sphingorhabdus wooponensis</i>            | NR_109148 | 99  | 3.7 | 4.7 | 5.2 | 4.4 | --  | --  | --  | --  | --  |
|                     | <i>Sphingopyxis</i> (553)                 | <i>Sphingopyxis fribergensis</i>             | NR_137271 | 100 | --  | 4   | 4.2 | 5   | --  | --  | --  | --  | --  |
|                     | <i>Woodsholea</i> (181)                   | <i>Aquidulcibacter paucihalophilus</i>       | NR_156862 | 91  | 5.2 | 5.4 | 5.4 | 6.1 | 2.9 | --  | --  | 2.3 |     |
|                     | <i>Woodsholea</i> (183)                   | <i>Roseitalea porphyridii</i>                | NR_156092 | 91  | 3   | 3.2 | 3.3 | 3.6 | --  | --  | --  | --  | --  |
|                     | <i>Woodsholea</i> (615)                   |                                              |           |     | --  | 3.2 | --  | 3.1 | --  | --  | --  | --  | --  |
|                     | Uncultured <i>Rhizobiaceae</i> (100)      | <i>Rhizobium azooxidifex</i>                 | NR_144599 | 99  | --  | 3.5 | 3   | 2.7 | --  | --  | --  | --  | --  |

|                                         |                                          |                                      |           |    |     |     |     |     |     |     |     |     |
|-----------------------------------------|------------------------------------------|--------------------------------------|-----------|----|-----|-----|-----|-----|-----|-----|-----|-----|
|                                         | Uncultured AKYH478 (645)                 | <i>Lacibacterium aquatile</i>        | NR_125556 | 94 | --  | 4   | --  | 4.2 | --  | 4.9 | --  | --  |
|                                         | <i>Defluviimonas</i> (202)               | <i>Defluviimonas aestuarii</i>       | NR_118305 | 99 | 2.2 | 2.8 | 2.8 | 2.6 | --  | --  | --  | --  |
| Deltaproteobacteria                     | <i>Bdellovibrio</i> (63)                 | <i>Bdellovibrio exovorus</i>         | NR_102876 | 98 | 4.7 | --  | 6.9 | --  | 5.6 | 7.9 | 6.6 | --  |
|                                         | <i>Haliangium</i> (479)                  | <i>Haliangium tepidum</i>            | NR_024781 | 91 | --  | --  | --  | --  | 3.9 | --  | 4   | 3.3 |
|                                         | <i>Haliangium</i> (248)                  | <i>Kofleria flava</i>                | NR_041981 | 92 | 5   | --  | --  | --  | 6.2 | --  | 3.3 | --  |
|                                         | <i>Haliangium</i> (457)                  | <i>Kofleria flava</i>                | NR_041981 | 93 | 3.9 | --  | --  | --  | 5   | 3.7 | 4.4 | 4.7 |
|                                         | <i>Haliangium</i> (739)                  | <i>Kofleria flava</i>                | NR_041981 | 90 | --  | --  | --  | --  | 3.8 | 4   | 4.1 | 4.6 |
|                                         | OM27-Clade (166)                         | <i>Rhodomicrobium vannielii</i>      | NR_074186 | 97 | --  | 6.3 | 4.6 | --  | --  | 4.6 | --  | 6.4 |
|                                         | <i>Anaeromyxobacter</i> (220)            | <i>Anaeromyxobacter dehalogenans</i> | NR_074927 | 92 | --  | --  | 3.2 | --  | 1.9 | 1.6 | 1.5 | --  |
|                                         | <i>Anaeromyxobacter</i> (82)             | <i>Anaeromyxobacter dehalogenans</i> | FJ190057  | 95 | --  | --  | --  | --  | 1.2 | 1.6 | --  | --  |
|                                         | <i>Sandaracinus</i> (260)                | <i>Sandaracinus amylolyticus</i>     | NR_118001 | 94 | --  | --  | --  | --  | 7.8 | --  | 7.1 | --  |
|                                         | <i>Sandaracinus</i> (382)                | <i>Sandaracinus amylolyticus</i>     | NR_118001 | 95 | --  | --  | --  | 4.8 | --  | 3.4 | 5.6 | 5   |
|                                         | <i>Sorangium</i> (709)                   | <i>Chondromyces lanuginosus</i>      | NR_025345 | 95 | --  | --  | --  | --  | 4.9 | 3.6 | 4.5 | 4.9 |
|                                         | <i>Sorangium</i> (1348)                  | <i>Labilithrix luteola</i>           | NR_126182 | 95 | --  | --  | --  | --  | 6.1 | --  | 6.4 | --  |
|                                         | <i>Sorangium</i> (352)                   | <i>Labilithrix luteola</i>           | NR_126182 | 96 | --  | --  | 3.4 | --  | --  | 3.2 | --  | --  |
|                                         | Uncultured <i>Cystobacteraceae</i> (203) | <i>Vitiosangium cumulatum</i>        | NR_156939 | 94 | --  | --  | 3.9 | 4.6 | --  | 2.5 | --  | 2.6 |
|                                         | Uncultured <i>Sandaracinaceae</i> (33)   | <i>Sandaracinus amylolyticus</i>     | NR_118001 | 91 | 6.3 | 5.8 | 6.8 | 6.5 | 8.3 | 6.6 | 8.4 | 7.8 |
| Uncultured <i>Sandaracinaceae</i> (404) | <i>Sandaracinus amylolyticus</i>         | NR_118001                            | 92        | -- | --  | --  | --  | 4.2 | --  | 5.9 | 4.4 |     |

|                                            |                                         |                                       |           |    |     |     |     |     |     |     |  |     |     |
|--------------------------------------------|-----------------------------------------|---------------------------------------|-----------|----|-----|-----|-----|-----|-----|-----|--|-----|-----|
|                                            | Uncultured <i>Sandaracinaceae</i> (686) | <i>Sandaracinus amylolyticus</i>      | NR_118001 | 89 | --  | --  | --  | --  | --  | 3.7 |  | 3.9 | 4.8 |
|                                            | Uncultured <i>Sandaracinaceae</i> (240) | <i>Sandaracinus amylolyticus</i>      | NR_118001 | 90 | 4.3 | 5.5 | 4.3 | 6   | 5.2 | 4.3 |  | 4.6 | 4.8 |
|                                            | Uncultured <i>Sandaracinaceae</i> (764) | <i>Sandaracinus amylolyticus</i>      | NR_118001 | 88 | --  | --  | --  | --  | 6.2 | --  |  | 6   | --  |
|                                            | Uncultured Sh765B-TzT-29 (414)          | <i>Desulfonatronum parangueonense</i> | NR_159236 | 91 | --  | --  | --  | --  | 4.1 | --  |  | 3.9 | 4.3 |
|                                            | Uncultured $\delta$ -bacteria (105)     | <i>Anaeromyxobacter dehalogenans</i>  | NR_074927 | 89 | --  | --  | 5.5 | --  | --  | 7.5 |  | --  | --  |
|                                            | Uncultured $\delta$ -bacteria (54)      | <i>Phaselicystis flava</i>            | NR_044523 | 89 | --  | --  | --  | --  | 5.0 | 5.0 |  | --  | 4.5 |
|                                            | <i>Phaselicystis</i> (163)              | <i>Jahnella thaxteri</i>              | NR_117461 | 95 | --  | --  | --  | --  | --  | --  |  | --  | 8.2 |
|                                            |                                         |                                       |           |    |     |     |     |     |     |     |  |     |     |
| Gammaproteobacteria (Betaproteobacterales) | <i>Hydrogenophaga</i> (9)               | <i>Hydrogenophaga defluvii</i>        | NR_029024 | 99 | 4.2 | 4.2 | 4.3 | 5.8 | 6   | 4.8 |  | 5.5 | 6.7 |
|                                            | <i>Leeia</i> (513)                      | <i>Annwoodia aquaesulis</i>           | NR_044793 | 98 | --  | 5   | --  | --  |     | --  |  | 2.1 | --  |
|                                            | <i>Piscinibacter</i> (14)               | <i>Piscinibacter aquaticus</i>        | NR_043921 | 99 | 2.5 | 3.5 | 3.1 | 3.5 | 3.7 | 2.3 |  | 2.4 | 2.8 |
|                                            | <i>Rhizobacter</i> (123)                | <i>Rhizobacter profundi</i>           | NR_149234 | 98 | --  | 5.7 | --  | 5.3 | 3   | 4.4 |  | 2.9 | 4.7 |
|                                            | Uncultured <i>Comamonadaceae</i> (4)    | <i>Kinneretia asaccharophila</i>      | NR_115151 | 99 | 1.4 | 2.6 | 2.3 | 3   | 2.2 | 1.8 |  | 1.8 | 2.7 |
|                                            | Uncultured <i>Comamonadaceae</i> (36)   | <i>Azohydromonas lata</i>             | NR_114103 | 98 | 3.1 | 4   | 3.4 | 4.1 | 4.6 | 4.3 |  | 3.3 | 4.4 |
|                                            | Uncultured <i>Comamonadaceae</i> (113)  | <i>Variovorax boronicumulans</i>      | NR_114214 | 98 | 3.1 | --  | 4.4 | 5.8 | --  | --  |  | --  | --  |
|                                            | Uncultured <i>Comamonadaceae</i> (152)  | <i>Azohydromonas lata</i>             | NR_114103 | 98 | --  | --  | --  | --  | 2.9 | 2.5 |  | 2.1 | 2.8 |
|                                            | Uncultured <i>Comamonadaceae</i> (1113) | <i>Rhodiferax antarcticus</i>         | NR_104835 | 97 | 3.8 | --  | --  | 5.1 | --  | 4   |  | --  | 4.1 |

|                                           |                                      |           |     |     |     |     |     |     |     |     |     |
|-------------------------------------------|--------------------------------------|-----------|-----|-----|-----|-----|-----|-----|-----|-----|-----|
| Uncultured <i>Comamonadaceae</i> (12)     | <i>Aquicola tertiaricarbonis</i>     | MH844953  | 99  | --  | 1.3 | --  | 1.6 | --  | 1.0 | --  | 1.0 |
| <i>Azohydromonas</i> (43)                 | <i>Zhizhongheella caldifontis</i>    | NR_134232 | 98  | --  | 2.7 | --  | 3.1 | 1.8 | 2.1 | 1.9 | 2.8 |
| Uncultured <i>Gallionellaceae</i> (320)   | <i>Sideroxydans lithotrophicus</i>   | NR_074731 | 95  | --  | 2.4 | 2.4 | 2.2 | --  | --  | --  | --  |
| Uncultured <i>Nitrosomonadaceae</i> (20)  | <i>Collimonas fungivorans</i>        | NR_028007 | 93  | --  | 1.8 | 1.3 | 2   | --  | --  | --  | --  |
| Uncultured <i>Nitrosomonadaceae</i> (350) | <i>Herbaspirillum chlorophenicum</i> | NR_114143 | 91  | --  | 3.7 | 2.8 | 3.8 | --  | --  | --  | --  |
| Uncultured <i>Nitrosomonadaceae</i> (92)  | <i>Nitrospira multiformis</i>        | NR_074736 | 92  | --  | --  | 1.1 | --  | --  | --  | --  | --  |
| Uncultured <i>Oxalobacteraceae</i> (215)  | <i>Herbaspirillum autotrophicum</i>  | NR_113747 | 98  | --  | 4   | 5.8 | 6.1 | --  | --  | 5.4 | 5.1 |
| <i>Vogesella</i> (44)                     | <i>Vogesella indigofera</i>          | NR_040800 | 100 | --  | --  | 4.7 | 5.7 | --  | --  | 3.5 | 4.3 |
| <i>Dechloromonas</i> (138)                | <i>Dechloromonas hortensis</i>       | NR_042819 | 98  | --  | --  | 3.1 | 3.3 | --  | --  | --  | 1.9 |
| <i>Thauera</i> (40)                       | <i>Thauera humireducens</i>          | NR_109534 | 99  | --  | --  | --  | 5.3 | --  | --  | 2.7 | 4.8 |
| Uncultured SC-I-84 (89)                   | <i>Robbsia andropogonis</i>          | NR_104960 | 91  | --  | --  | --  | 1.4 | --  | 2.7 | 2.3 | 3.4 |
| Uncultured SC-I-84 (354)                  | <i>Tepidimonas thermarum</i>         | NR_042418 | 91  | --  | --  | --  | 2   | --  | --  | --  | 4.1 |
| Uncultured $\beta$ -proteobacteria (66)   | <i>Derxia gummosa</i>                | NR_114127 | 93  | --  | --  | --  | 2   | --  | --  | --  | 2.6 |
| <i>Zoogloea</i> (266)                     | <i>Zoogloea ramigera</i>             | MK138653  | 100 | --  | --  | --  | --  | --  | --  | --  | 3.1 |
| <i>Acidiferrobacter</i> (67)              | <i>Sulfuricaulis limicola</i>        | NR_147747 | 93  | --  | 1.8 | 1.4 | 1.4 | --  | --  | --  | --  |
| <i>Arenimonas</i> (520)                   | <i>Arenimonas subflava</i>           | NR_135888 | 97  | 5.3 | --  | 4.7 | 4.7 | 4.5 | 4.7 | 4.1 | 4.1 |

|                  |                                            |                                      |           |     |     |     |  |     |     |  |     |     |  |     |     |
|------------------|--------------------------------------------|--------------------------------------|-----------|-----|-----|-----|--|-----|-----|--|-----|-----|--|-----|-----|
|                  | <i>Arenimonas</i> (357)                    | <i>Arenimonas subflava</i>           | NR_135888 | 99  |     | 5.6 |  | 4.4 | --  |  | 4.8 | --  |  | 3.9 | 4.5 |
|                  | <i>Pseudomonas</i> (24)                    | <i>Pseudomonas migulae</i>           | NR_114223 | 99  | 4.5 | 6.2 |  | 6.8 | --  |  | 3   | 3.1 |  | 4.6 | 5.4 |
|                  | Uncultured <i>Pseudomonadaceae</i> (3)     | <i>Pseudomonas linyingensis</i>      | MG576046  | 100 | --  | --  |  | 5.0 | 6.6 |  | --  | --  |  | 3.4 | 7.8 |
|                  | <i>Thermomonas</i> (58)                    | <i>Thermomonas carbonis</i>          | NR_134219 | 97  | 2.5 | 3.6 |  | 3.4 | 4   |  | --  | --  |  | --  | --  |
|                  | Uncultured <i>Xanthomonadaceae</i> (70)    | <i>Dyella marensis</i>               | NR_042691 | 94  | --  | --  |  | 2.8 | 1.8 |  | --  | --  |  | --  | --  |
|                  | Uncultured $\gamma$ -proteobacteria (452)  | <i>Permianibacter aggregans</i>      | NR_134131 | 96  | --  | 4.7 |  | 4.2 | 4.5 |  | 4.5 | 4.4 |  | 5.6 | 3.9 |
|                  | Uncultured $\gamma$ -proteobacteria (541)  | <i>Permianibacter aggregans</i>      | NR_134131 | 93  | --  | --  |  | 5.3 | --  |  | 5.1 | --  |  | 5.9 | --  |
|                  | Uncultured $\gamma$ -proteobacteria (505)  | <i>Steroidobacter denitrificans</i>  | NR_044309 | 90  | --  | 4.4 |  | 3.4 | 3.7 |  | --  | --  |  | --  | --  |
|                  | Uncultured $\gamma$ -proteobacteria (715)  | <i>Pseudomonas reidholzensis</i>     | NR_157777 | 91  | 6.3 | --  |  | --  | 5.1 |  |     | 4.4 |  | 5.2 | 4.7 |
|                  | Uncultured $\gamma$ -proteobacteria (1758) | <i>Sulfuriflexus mobilis</i>         | NR_152000 | 90  | 6.3 | --  |  | --  | --  |  | --  | --  |  | --  | --  |
|                  | <i>Acidiferrobacter</i> (196)              | <i>Acidiferrobacter thiooxydans</i>  | NR_114629 | 90  | 1.6 | 2   |  | --  | 1.7 |  | --  | --  |  | --  | --  |
|                  |                                            |                                      |           |     |     |     |  |     |     |  |     |     |  |     |     |
| Saccharibacteria | Uncultured Saccharibacteria (980)          | <i>Alkaliphilus metalliredigens</i>  | NR_074633 | 81  | 4.1 | --  |  | 4.9 | --  |  | --  | --  |  | --  | --  |
|                  |                                            |                                      |           |     | --  | --  |  | --  | --  |  | --  | --  |  | --  | --  |
| Verrucomicrobia  | <i>Prostheco bacter</i> (162)              | <i>Prostheco bacter vanneervanii</i> | NR_026022 | 97  | 3.5 | 6.8 |  | --  | 6   |  | --  | 3.8 |  | --  | 2.9 |
|                  | <i>Verrucomicrobium</i> (903)              | <i>Verrucomicrobium spinosum</i>     | NR_026266 | 87  | --  | 4.3 |  | --  | --  |  | --  | 3.8 |  | --  | --  |
|                  | Uncultured DEV007 (1517)                   | <i>Roseibacillus ponti</i>           | NR_041622 | 88  | --  | --  |  | 5.5 |     |  | --  | --  |  | --  | --  |
| Unclassified     | Uncultured bacterium (315)                 | <i>Thiomonas islandica</i>           | NR_116394 | 80  | 6.5 | --  |  | 5.1 | --  |  | --  | --  |  | --  | --  |
|                  | Uncultured bacterium (255)                 | <i>Negadavirga shengliensis</i>      | NR_136439 | 81  | --  | --  |  | --  | --  |  | 4.1 | 6.2 |  | --  | 3.7 |

<sup>a</sup> Gene bank accession number.

<sup>b</sup> Similarity of OTU representative 16S rRNA gene sequence to that of closest cultured relative.

<sup>c</sup> Non-significant differential abundance between treatment and unamended controls.

<sup>d</sup> Significant ( $p\text{-adj} < 0.1$ ) Log<sub>2</sub>-fold change  $> 0$  are reported as determined by Deseq2.



Table S3: Relative abundance of bacterial OTUs from the original microbial community enriched by 40 and 400  $\mu$ M ibuprofen treatments at DNA and RNA levels under oxic conditions after incubation. 0, represents unamended samples and 40 and 400 correspond to samples amended with 40 and 400  $\mu$ M ibuprofen, respectively. 0', 3', and 5' correspond to samples obtained at the start of the incubation, and after the third and fifth refeeding, respectively. Data represents the mean of triplicate samples in % of total rarified reads (uniform sequencing depth of 10,767 per sample)  $\pm$  standard error of mean (SEM).

| Phylum/Subphylum-level | Genus-level (OTU No.)       | DNA             |                 |                 |                 |                 |                 |                 |
|------------------------|-----------------------------|-----------------|-----------------|-----------------|-----------------|-----------------|-----------------|-----------------|
|                        |                             | 0_0'            | 0_3'            | 0_5'            | 40_3'           | 40_5'           | 400_3'          | 400_5'          |
| Acidobacteria          | <i>Bryobacter</i> (144)     | 0.28 $\pm$ 0.05 | 0.04 $\pm$ 0.00 | 0.12 $\pm$ 0.02 | 0.15 $\pm$ 0.02 | 0.17 $\pm$ 0.02 | 0.10 $\pm$ 0.02 | 0.09 $\pm$ 0.03 |
|                        | <i>Bryobacter</i> (61)      | 0.07 $\pm$ 0.03 | 0.05 $\pm$ 0.00 | 0.11 $\pm$ 0.01 | 0.1 $\pm$ 0.02  | 0.09 $\pm$ 0.00 | 0.12 $\pm$ 0.01 | 0.17 $\pm$ 0.04 |
|                        | <i>Bryobacter</i> (115)     | 0.25 $\pm$ 0.06 | 0.03 $\pm$ 0.01 | 0.23 $\pm$ 0.02 | 0.06 $\pm$ 0.01 | 0.09 $\pm$ 0.02 | 0.07 $\pm$ 0.00 | 0.09 $\pm$ 0.01 |
|                        | <i>Bryobacter</i> (562)     | 0.01 $\pm$ 0.00 | 0.01 $\pm$ 0.01 | 0.01 $\pm$ 0.00 | 0.01 $\pm$ 0.00 | 0.02 $\pm$ 0.01 | 0.01 $\pm$ 0.01 | 0.05 $\pm$ 0.02 |
|                        | Uncultured subgroup_3 (901) | 0.03 $\pm$ 0.00 | 0.01 $\pm$ 0.00 | 0.01 $\pm$ 0.00 | 0.01 $\pm$ 0.00 | 0.01 $\pm$ 0.01 | 0.00 $\pm$ 0.00 | 0.02 $\pm$ 0.01 |
|                        | Uncultured subgroup_3 (55)  | 0.00 $\pm$ 0.00 | 0.11 $\pm$ 0.01 | 0.26 $\pm$ 0.05 | 0.07 $\pm$ 0.02 | 0.14 $\pm$ 0.03 | 0.08 $\pm$ 0.02 | 0.18 $\pm$ 0.02 |
|                        | Uncultured subgroup_3 (516) | 0.01 $\pm$ 0.01 | 0.01 $\pm$ 0.00 | 0.03 $\pm$ 0.01 | 0.01 $\pm$ 0.00 | 0.03 $\pm$ 0.01 | 0.01 $\pm$ 0.00 | 0.02 $\pm$ 0.00 |
|                        | <i>Blastocatella</i> (126)  | 0.16 $\pm$ 0.02 | 0.17 $\pm$ 0.00 | 0.27 $\pm$ 0.01 | 0.16 $\pm$ 0.01 | 0.45 $\pm$ 0.04 | 0.19 $\pm$ 0.01 | 0.61 $\pm$ 0.12 |
|                        | Uncultured subgroup_6 (85)  | 0.05 $\pm$ 0.01 | 0.02 $\pm$ 0.01 | 0.05 $\pm$ 0.01 | 0.13 $\pm$ 0.02 | 0.34 $\pm$ 0.12 | 0.09 $\pm$ 0.03 | 1.09 $\pm$ 0.43 |
|                        | Uncultured subgroup_6 (10)  | 0.01 $\pm$ 0.00 | 0.23 $\pm$ 0.05 | 0.86 $\pm$ 0.12 | 0.48 $\pm$ 0.03 | 0.92 $\pm$ 0.04 | 0.52 $\pm$ 0.01 | 1.39 $\pm$ 0.22 |
|                        | Uncultured subgroup_6 (212) | 0.21 $\pm$ 0.03 | 0.03 $\pm$ 0.01 | 0.11 $\pm$ 0.01 | 0.09 $\pm$ 0.01 | 0.11 $\pm$ 0.02 | 0.06 $\pm$ 0.00 | 0.11 $\pm$ 0.01 |
|                        | Uncultured subgroup_6 (304) | 0.00 $\pm$ 0.00 | 0.01 $\pm$ 0.00 | 0.04 $\pm$ 0.00 | 0.08 $\pm$ 0.00 | 0.10 $\pm$ 0.01 | 0.05 $\pm$ 0.02 | 0.08 $\pm$ 0.01 |
|                        | Uncultured subgroup_6 (401) | 0.01 $\pm$ 0.01 | 0.04 $\pm$ 0.01 | 0.04 $\pm$ 0.00 | 0.07 $\pm$ 0.02 | 0.07 $\pm$ 0.02 | 0.09 $\pm$ 0.02 | 0.12 $\pm$ 0.02 |
|                        | Uncultured subgroup_6 (581) | 0.03 $\pm$ 0.01 | 0.03 $\pm$ 0.00 | 0.1 $\pm$ 0.02  | 0.02 $\pm$ 0.01 | 0.05 $\pm$ 0.01 | 0.01 $\pm$ 0.00 | 0.03 $\pm$ 0.00 |

|                |                                      |             |             |             |             |             |             |             |
|----------------|--------------------------------------|-------------|-------------|-------------|-------------|-------------|-------------|-------------|
|                | Uncultured subgroup_6 (412)          | 0.02 ± 0.00 | 0.04 ± 0.01 | 0.09 ± 0.03 | 0.08 ± 0.02 | 0.15 ± 0.02 | 0.08 ± 0.02 | 0.05 ± 0.02 |
|                | Uncultured subgroup_6 (147)          | 0.04 ± 0.00 | 0.06 ± 0.01 | 0.05 ± 0.01 | 0.11 ± 0.02 | 0.23 ± 0.05 | 0.10 ± 0.01 | 0.17 ± 0.02 |
|                | Uncultured subgroup_6 (85)           | 0.05 ± 0.01 | 0.02 ± 0.01 | 0.05 ± 0.01 | 0.13 ± 0.02 | 0.34 ± 0.12 | 0.09 ± 0.03 | 1.09 ± 0.43 |
|                | Uncultured subgroup_17 (39)          | 0.00 ± 0.00 | 0.09 ± 0.02 | 0.70 ± 0.06 | 0.54 ± 0.07 | 0.89 ± 0.09 | 0.42 ± 0.02 | 0.60 ± 0.17 |
|                | Uncultured subgroup_22 (329)         | 0.01 ± 0.01 | 0.01 ± 0.02 | 0.06 ± 0.01 | 0.06 ± 0.01 | 0.11 ± 0.01 | 0.04 ± 0.02 | 0.03 ± 0.01 |
|                | Uncultured subgroup_22 (340)         | 0.01 ± 0.01 | 0.01 ± 0.01 | 0.13 ± 0.01 | 0.03 ± 0.01 | 0.05 ± 0.00 | 0.04 ± 0.00 | 0.02 ± 0.01 |
|                | Uncultured subgroup_22 (57)          | 0.34 ± 0.03 | 0.04 ± 0.00 | 0.35 ± 0.06 | 0.17 ± 0.03 | 0.17 ± 0.05 | 0.17 ± 0.01 | 0.25 ± 0.04 |
| Actinobacteria | Uncultured Sva0996_marine_group (83) | 0.12 ± 0.01 | 0.1 ± 0.00  | 0.20 ± 0.02 | 0.24 ± 0.05 | 0.46 ± 0.03 | 0.22 ± 0.05 | 0.38 ± 0.06 |
|                | <i>Aeromicrobium</i> (332)           | 0.04 ± 0.01 | 0.00 ± 0.00 | 0.02 ± 0.01 | 0.01 ± 0.00 | 0.11 ± 0.07 | 0.01 ± 0.01 | 0.25 ± 0.13 |
|                | <i>Marmoricola</i> (69)              | 0.31 ± 0.09 | 0.05 ± 0.01 | 0.04 ± 0.02 | 0.20 ± 0.02 | 0.22 ± 0.05 | 0.14 ± 0.04 | 0.20 ± 0.10 |
|                | <i>Nocardioides</i> (372)            | 0.00 ± 0.00 | 0.02 ± 0.00 | 0.05 ± 0.02 | 0.09 ± 0.01 | 0.13 ± 0.02 | 0.14 ± 0.01 | 0.10 ± 0.02 |
|                | <i>Nocardioides</i> (210)            | 0.07 ± 0.02 | 0.04 ± 0.01 | 0.02 ± 0.00 | 0.15 ± 0.02 | 0.15 ± 0.03 | 0.14 ± 0.05 | 0.16 ± 0.09 |
|                | <i>Nocardioides</i> (102)            | 0.07 ± 0.01 | 0.15 ± 0.01 | 0.23 ± 0.00 | 0.39 ± 0.02 | 0.21 ± 0.01 | 0.46 ± 0.01 | 0.28 ± 0.09 |
|                | Uncultured MB-A2-108 (94)            | 0.22 ± 0.03 | 0.24 ± 0.07 | 0.39 ± 0.03 | 0.36 ± 0.01 | 0.41 ± 0.02 | 0.30 ± 0.04 | 0.21 ± 0.00 |
|                | <i>Iamia</i> (188)                   | 0.15 ± 0.03 | 0.03 ± 0.01 | 0.05 ± 0.01 | 0.10 ± 0.01 | 0.08 ± 0.01 | 0.18 ± 0.03 | 0.15 ± 0.02 |
|                | <i>Iamia</i> (362)                   | 0.06 ± 0.00 | 0.04 ± 0.01 | 0.02 ± 0.00 | 0.06 ± 0.02 | 0.13 ± 0.04 | 0.04 ± 0.01 | 0.08 ± 0.01 |
|                | Uncultured Acidimicrobiales (1265)   | 0.05 ± 0.01 | 0.00 ± 0.00 | 0.00 ± 0.00 | 0.02 ± 0.01 | 0.00 ± 0.00 | 0.03 ± 0.01 | 0.01 ± 0.00 |
|                | Uncultured 480-2(627)                | 0.00 ± 0.00 | 0.03 ± 0.01 | 0.03 ± 0.01 | 0.04 ± 0.01 | 0.07 ± 0.01 | 0.03 ± 0.00 | 0.05 ± 0.01 |
|                | <i>Solirubrobacter</i> (29)          | 0.05 ± 0.02 | 0.04 ± 0.02 | 0.03 ± 0.01 | 0.03 ± 0.01 | 0.04 ± 0.01 | 0.03 ± 0.00 | 0.04 ± 0.00 |
|                | Sva0996_marine_group(441)            | 0.00 ± 0.00 | 0.00 ± 0.00 | 0.04 ± 0.00 | 0.04 ± 0.01 | 0.04 ± 0.01 | 0.03 ± 0.01 | 0.04 ± 0.00 |
|                | <i>Flavobacterium</i> (633)          | 0.02 ± 0.01 | 0.00 ± 0.00 | 0.00 ± 0.00 | 0.11 ± 0.04 | 0.01 ± 0.00 | 0.18 ± 0.14 | 0.00 ± 0.00 |
|                | <i>Flavobacterium</i> (2394)         | 0.01 ± 0.00 | 0.00 ± 0.00 | 0.00 ± 0.00 | 0.00 ± 0.00 | 0.00 ± 0.01 | 0.12 ± 0.09 | 0.00 ± 0.00 |
|                | Uncultured NS9_marine_group (438)    | 0.06 ± 0.01 | 0.03 ± 0.01 | 0.05 ± 0.01 | 0.06 ± 0.03 | 0.01 ± 0.00 | 0.23 ± 0.07 | 0.08 ± 0.04 |
|                | Uncultured NS9_marine_group (277)    | 0.02 ± 0.00 | 0.02 ± 0.01 | 0.04 ± 0.02 | 0.08 ± 0.01 | 0.06 ± 0.00 | 0.24 ± 0.09 | 0.13 ± 0.03 |

|                 |                                           |             |             |             |             |             |             |             |
|-----------------|-------------------------------------------|-------------|-------------|-------------|-------------|-------------|-------------|-------------|
|                 | <i>Rhodococcus</i> (459)                  | 0.00 ± 0.00 | 0.00 ± 0.00 | 0.08 ± 0.01 | 0.01 ± 0.01 | 0.04 ± 0.02 | 0.04 ± 0.01 | 0.04 ± 0.01 |
|                 | <i>Fodinicola</i> (15)                    | 0.06 ± 0.02 | 0.52 ± 0.08 | 1.25 ± 0.07 | 1.26 ± 0.17 | 0.97 ± 0.07 | 1.31 ± 0.18 | 0.76 ± 0.11 |
|                 | <i>Nocardioides</i> (405)                 | 0.00 ± 0.00 | 0.01 ± 0.00 | 0.10 ± 0.02 | 0.12 ± 0.04 | 0.06 ± 0.01 | 0.13 ± 0.01 | 0.12 ± 0.01 |
|                 | Uncultured Acidimicrobiales (612)         | 0.00 ± 0.00 | 0.00 ± 0.00 | 0.05 ± 0.01 | 0.03 ± 0.01 | 0.03 ± 0.01 | 0.03 ± 0.00 | 0.04 ± 0.01 |
|                 | Uncultured Actinobacteria (359)           | 0.00 ± 0.00 | 0.01 ± 0.01 | 0.07 ± 0.01 | 0.13 ± 0.02 | 0.05 ± 0.01 | 0.11 ± 0.01 | 0.08 ± 0.01 |
|                 | Uncultured MB-A2-108 (137)                | 0.11 ± 0.02 | 0.09 ± 0.01 | 0.41 ± 0.06 | 0.24 ± 0.01 | 0.32 ± 0.02 | 0.31 ± 0.05 | 0.20 ± 0.03 |
|                 | CL500-29_marine_group (28)                | 0.26 ± 0.04 | 0.04 ± 0.01 | 0.07 ± 0.03 | 0.07 ± 0.02 | 0.09 ± 0.01 | 0.09 ± 0.01 | 0.57 ± 0.04 |
|                 | Uncultured Acidimicrobiales (569)         | 0.04 ± 0.00 | 0.05 ± 0.00 | 0.01 ± 0.00 | 0.08 ± 0.03 | 0.02 ± 0.00 | 0.02 ± 0.01 | 0.01 ± 0.01 |
|                 | Uncultured <i>Intrasporangiaceae</i> (19) | 0.47 ± 0.03 | 0.12 ± 0.01 | 0.18 ± 0.02 | 0.24 ± 0.03 | 0.22 ± 0.02 | 0.24 ± 0.03 | 0.22 ± 0.06 |
|                 | <i>Gaiella</i> (45)                       | 0.00 ± 0.00 | 0.45 ± 0.07 | 0.30 ± 0.02 | 0.26 ± 0.01 | 0.47 ± 0.02 | 0.22 ± 0.01 | 0.29 ± 0.02 |
| Armatimonadetes | Uncultured Armatimonadetes (371)          | 0.17 ± 0.06 | 0.00 ± 0.00 | 0.00 ± 0.00 | 0.01 ± 0.01 | 0.07 ± 0.03 | 0.01 ± 0.00 | 0.33 ± 0.08 |
| Bacteroidetes   | <i>Chryseolinea</i> (165)                 | 0.10 ± 0.02 | 0.01 ± 0.00 | 0.08 ± 0.03 | 0.45 ± 0.07 | 0.26 ± 0.04 | 0.18 ± 0.05 | 0.17 ± 0.04 |
|                 | <i>Chryseolinea</i> (483)                 | 0.05 ± 0.02 | 0.00 ± 0.00 | 0.03 ± 0.01 | 0.15 ± 0.07 | 0.07 ± 0.02 | 0.09 ± 0.01 | 0.07 ± 0.03 |
|                 | <i>Chryseolinea</i> (231)                 | 0.21 ± 0.02 | 0.03 ± 0.01 | 0.13 ± 0.01 | 0.32 ± 0.06 | 0.19 ± 0.02 | 0.20 ± 0.04 | 0.13 ± 0.04 |
|                 | <i>Chryseolinea</i> (1195)                | 0.02 ± 0.00 | 0.00 ± 0.00 | 0.02 ± 0.00 | 0.04 ± 0.01 | 0.04 ± 0.01 | 0.02 ± 0.01 | 0.02 ± 0.01 |
|                 | Uncultured <i>Rhodothermaceae</i> (363)   | 0.02 ± 0.01 | 0.00 ± 0.00 | 0.00 ± 0.00 | 0.02 ± 0.00 | 0.10 ± 0.01 | 0.01 ± 0.01 | 0.04 ± 0.03 |
|                 | <i>Ferruginibacter</i> (499)              | 0.09 ± 0.01 | 0.00 ± 0.00 | 0.01 ± 0.01 | 0.04 ± 0.00 | 0.04 ± 0.01 | 0.09 ± 0.00 | 0.15 ± 0.05 |
|                 | <i>Ferruginibacter</i> (378)              | 0.02 ± 0.01 | 0.02 ± 0.01 | 0.05 ± 0.02 | 0.11 ± 0.04 | 0.06 ± 0.01 | 0.09 ± 0.01 | 0.16 ± 0.04 |
|                 | <i>Flavobacterium</i> (2394)              | 0.01 ± 0.00 | 0.00 ± 0.00 | 0.00 ± 0.00 | 0.00 ± 0.00 | 0.00 ± 0.00 | 0.12 ± 0.09 | 0.00 ± 0.00 |
|                 | <i>Flavobacterium</i> (376)               | 0.02 ± 0.01 | 0.00 ± 0.00 | 0.00 ± 0.00 | 0.20 ± 0.07 | 0.08 ± 0.02 | 0.04 ± 0.01 | 0.00 ± 0.00 |
|                 | Uncultured <i>Cytophagaceae</i> (451)     | 0.11 ± 0.02 | 0.00 ± 0.00 | 0.02 ± 0.01 | 0.10 ± 0.04 | 0.09 ± 0.04 | 0.03 ± 0.01 | 0.10 ± 0.04 |
|                 | <i>Ferruginibacter</i> (256)              | 0.00 ± 0.00 | 0.02 ± 0.01 | 0.06 ± 0.01 | 0.19 ± 0.08 | 0.14 ± 0.01 | 0.13 ± 0.02 | 0.21 ± 0.07 |
|                 | Uncultured <i>Saprospiraceae</i> (380)    | 0.00 ± 0.00 | 0.02 ± 0.01 | 0.04 ± 0.02 | 0.05 ± 0.01 | 0.03 ± 0.01 | 0.13 ± 0.05 | 0.16 ± 0.04 |
|                 | Uncultured <i>Saprospiraceae</i> (383)    | 0.00 ± 0.00 | 0.01 ± 0.00 | 0.02 ± 0.00 | 0.04 ± 0.01 | 0.18 ± 0.08 | 0.09 ± 0.02 | 0.13 ± 0.01 |

|                  |                                           |             |             |             |             |             |             |             |
|------------------|-------------------------------------------|-------------|-------------|-------------|-------------|-------------|-------------|-------------|
|                  | Uncultured <i>Saprosiraceae</i> (472)     | 0.04 ± 0.01 | 0.00 ± 0.00 | 0.01 ± 0.01 | 0.02 ± 0.01 | 0.02 ± 0.01 | 0.14 ± 0.07 | 0.29 ± 0.14 |
|                  | Uncultured Sphingobacteriales (711)       | 0.02 ± 0.01 | 0.00 ± 0.00 | 0.02 ± 0.01 | 0.08 ± 0.02 | 0.02 ± 0.00 | 0.12 ± 0.01 | 0.04 ± 0.02 |
|                  | Uncultured env.OPS_17 (726)               | 0.01 ± 0.00 | 0.00 ± 0.00 | 0.00 ± 0.00 | 0.02 ± 0.01 | 0.00 ± 0.00 | 0.20 ± 0.08 | 0.00 ± 0.00 |
|                  | Uncultured env.OPS_17 (876)               | 0.01 ± 0.00 | 0.00 ± 0.00 | 0.02 ± 0.01 | 0.05 ± 0.02 | 0.01 ± 0.00 | 0.11 ± 0.03 | 0.01 ± 0.01 |
|                  | Uncultured env.OPS_17 (548)               | 0.01 ± 0.01 | 0.00 ± 0.00 | 0.00 ± 0.00 | 0.00 ± 0.00 | 0.05 ± 0.00 | 0.01 ± 0.01 | 0.09 ± 0.09 |
|                  | Uncultured KD3-93 (46)                    | 0.33 ± 0.06 | 0.00 ± 0.00 | 0.00 ± 0.00 | 0.17 ± 0.00 | 0.02 ± 0.01 | 0.61 ± 0.26 | 0.09 ± 0.06 |
|                  | NS11-12_marine_group (616)                | 0.01 ± 0.01 | 0.00 ± 0.00 | 0.00 ± 0.00 | 0.09 ± 0.02 | 0.03 ± 0.01 | 0.14 ± 0.03 | 0.03 ± 0.02 |
|                  | PHOS-HE51 (1186)                          | 0.00 ± 0.00 | 0.00 ± 0.00 | 0.00 ± 0.00 | 0.02 ± 0.01 | 0.01 ± 0.00 | 0.07 ± 0.03 | 0.04 ± 0.01 |
|                  | Uncultured Sphingobacteriales (409)       | 0.23 ± 0.09 | 0.00 ± 0.00 | 0.00 ± 0.00 | 0.00 ± 0.00 | 0.04 ± 0.01 | 0.00 ± 0.00 | 0.09 ± 0.03 |
|                  | <i>Terrimonas</i> (139)                   | 0.02 ± 0.00 | 0.02 ± 0.01 | 0.03 ± 0.01 | 0.22 ± 0.05 | 0.14 ± 0.03 | 0.21 ± 0.05 | 0.72 ± 0.21 |
|                  | <i>Terrimonas</i> (149)                   | 0.04 ± 0.00 | 0.03 ± 0.01 | 0.07 ± 0.01 | 0.36 ± 0.27 | 0.06 ± 0.01 | 0.15 ± 0.07 | 0.12 ± 0.05 |
|                  | <i>Terrimonas</i> (253)                   | 0.03 ± 0.01 | 0.03 ± 0.00 | 0.12 ± 0.02 | 0.17 ± 0.02 | 0.10 ± 0.01 | 0.15 ± 0.02 | 0.11 ± 0.03 |
| Cand_div_BRC1    | Uncultured Candidate_div_BRC1 (542)       | 0.00 ± 0.00 | 0.00 ± 0.00 | 0.02 ± 0.01 | 0.02 ± 0.01 | 0.01 ± 0.00 | 0.00 ± 0.00 | 0.01 ± 0.01 |
|                  | Uncultured Candidate_div_BRC1 (1346)      | 0.01 ± 0.00 | 0.00 ± 0.00 | 0.00 ± 0.00 | 0.00 ± 0.00 | 0.00 ± 0.00 | 0.00 ± 0.00 | 0.00 ± 0.00 |
| Gemmatimonadetes | Uncultured <i>Gemmatimonadaceae</i> (124) | 0.00 ± 0.00 | 0.01 ± 0.01 | 0.08 ± 0.03 | 0.13 ± 0.01 | 0.10 ± 0.01 | 0.17 ± 0.01 | 0.13 ± 0.01 |
|                  | Uncultured <i>Gemmatimonadaceae</i> (32)  | 0.51 ± 0.07 | 0.14 ± 0.04 | 0.41 ± 0.04 | 0.62 ± 0.08 | 1.06 ± 0.07 | 0.41 ± 0.04 | 0.48 ± 0.08 |
|                  | Uncultured <i>Gemmatimonadaceae</i> (52)  | 0.31 ± 0.05 | 0.09 ± 0.02 | 0.28 ± 0.05 | 0.30 ± 0.08 | 0.42 ± 0.05 | 0.21 ± 0.05 | 0.26 ± 0.05 |
|                  | Uncultured <i>Gemmatimonadaceae</i> (251) | 0.00 ± 0.00 | 0.00 ± 0.00 | 0.06 ± 0.00 | 0.06 ± 0.03 | 0.09 ± 0.00 | 0.05 ± 0.02 | 0.08 ± 0.01 |
|                  | Uncultured <i>Gemmatimonadaceae</i> (269) | 0.09 ± 0.05 | 0.01 ± 0.00 | 0.04 ± 0.01 | 0.10 ± 0.01 | 0.07 ± 0.01 | 0.06 ± 0.02 | 0.06 ± 0.01 |
|                  | Uncultured <i>Gemmatimonadaceae</i> (299) | 0.01 ± 0.01 | 0.03 ± 0.00 | 0.02 ± 0.00 | 0.06 ± 0.00 | 0.17 ± 0.01 | 0.07 ± 0.03 | 0.13 ± 0.07 |
|                  | Uncultured <i>Gemmatimonadaceae</i> (388) | 0.06 ± 0.02 | 0.05 ± 0.01 | 0.07 ± 0.02 | 0.08 ± 0.01 | 0.08 ± 0.01 | 0.04 ± 0.01 | 0.03 ± 0.01 |
| Chlorobi         | Uncultured BSV26 (580)                    | 0.02 ± 0.01 | 0.00 ± 0.00 | 0.02 ± 0.01 | 0.06 ± 0.01 | 0.02 ± 0.01 | 0.04 ± 0.00 | 0.01 ± 0.01 |
|                  | Uncultured BSV26 (93)                     | 0.20 ± 0.01 | 0.11 ± 0.04 | 0.33 ± 0.13 | 0.63 ± 0.04 | 0.24 ± 0.01 | 0.45 ± 0.09 | 0.18 ± 0.02 |
|                  | Uncultured BSV26 (413)                    | 0.05 ± 0.01 | 0.01 ± 0.00 | 0.06 ± 0.01 | 0.10 ± 0.03 | 0.05 ± 0.01 | 0.13 ± 0.03 | 0.05 ± 0.01 |

|                                  |                                         |                                 |             |             |             |             |             |             |
|----------------------------------|-----------------------------------------|---------------------------------|-------------|-------------|-------------|-------------|-------------|-------------|
|                                  | Uncultured OPB56 (740)                  | 0.00 ± 0.00                     | 0.00 ± 0.00 | 0.01 ± 0.00 | 0.02 ± 0.00 | 0.00 ± 0.00 | 0.04 ± 0.03 | 0.01 ± 0.00 |
|                                  | Uncultured SJA-28 (284)                 | 0.07 ± 0.00                     | 0.07 ± 0.00 | 0.21 ± 0.02 | 0.26 ± 0.04 | 0.12 ± 0.01 | 0.10 ± 0.01 | 0.11 ± 0.01 |
| Chloroflexi                      | Uncultured <i>Caldilineaceae</i> (110)  | 0.14 ± 0.02                     | 0.09 ± 0.00 | 0.76 ± 0.07 | 0.27 ± 0.05 | 0.38 ± 0.09 | 0.21 ± 0.06 | 0.38 ± 0.11 |
|                                  | Uncultured KD4-96 (27)                  | 0.08 ± 0.02                     | 0.31 ± 0.10 | 0.56 ± 0.02 | 0.56 ± 0.04 | 0.97 ± 0.08 | 0.47 ± 0.06 | 0.93 ± 0.09 |
|                                  | Uncultured <i>Anaerolineaceae</i> (233) | 0.10 ± 0.02                     | 0.02 ± 0.01 | 0.15 ± 0.01 | 0.09 ± 0.01 | 0.19 ± 0.01 | 0.11 ± 0.03 | 0.12 ± 0.03 |
|                                  | Uncultured <i>Anaerolineaceae</i> (611) | 0.04 ± 0.01                     | 0.00 ± 0.00 | 0.00 ± 0.00 | 0.04 ± 0.01 | 0.05 ± 0.02 | 0.03 ± 0.02 | 0.13 ± 0.04 |
|                                  | Uncultured <i>Anaerolineaceae</i> (628) | 0.04 ± 0.01                     | 0.00 ± 0.00 | 0.03 ± 0.01 | 0.04 ± 0.02 | 0.07 ± 0.01 | 0.03 ± 0.02 | 0.04 ± 0.01 |
|                                  | Unclassified Gitt-GS-136 (127)          | 0.14 ± 0.02                     | 0.11 ± 0.10 | 0.13 ± 0.02 | 0.17 ± 0.03 | 0.42 ± 0.02 | 0.10 ± 0.01 | 0.30 ± 0.05 |
|                                  | Uncultured KD4-96 (96)                  | 0.12 ± 0.03                     | 0.20 ± 0.03 | 0.16 ± 0.03 | 0.20 ± 0.03 | 0.66 ± 0.05 | 0.14 ± 0.04 | 0.20 ± 0.04 |
|                                  | Unclassified JG30-KF-CM45 (145)         | 0.05 ± 0.00                     | 0.05 ± 0.01 | 0.13 ± 0.02 | 0.13 ± 0.01 | 0.24 ± 0.03 | 0.18 ± 0.03 | 0.43 ± 0.08 |
|                                  | Uncultured KD4-96 (8)                   | 0.12 ± 0.05                     | 1.59 ± 0.47 | 1.33 ± 0.04 | 1.18 ± 0.02 | 1.06 ± 0.03 | 1.08 ± 0.11 | 1.18 ± 0.06 |
|                                  | Uncultured KD4-96 (16)                  | 0.38 ± 0.04                     | 0.83 ± 0.20 | 0.43 ± 0.07 | 0.74 ± 0.05 | 1.09 ± 0.05 | 0.48 ± 0.05 | 1.04 ± 0.10 |
|                                  | Latescibacteria                         | Uncultured Latescibacteria (95) | 0.21 ± 0.01 | 0.04 ± 0.01 | 0.07 ± 0.01 | 0.18 ± 0.02 | 0.15 ± 0.02 | 0.18 ± 0.01 |
| Uncultured Latescibacteria (154) |                                         | 0.14 ± 0.01                     | 0.00 ± 0.00 | 0.06 ± 0.03 | 0.12 ± 0.01 | 0.02 ± 0.01 | 0.08 ± 0.03 | 0.06 ± 0.02 |
| Uncultured Latescibacteria (308) |                                         | 0.01 ± 0.00                     | 0.01 ± 0.01 | 0.01 ± 0.01 | 0.01 ± 0.01 | 0.10 ± 0.02 | 0.01 ± 0.01 | 0.15 ± 0.05 |
| Uncultured Latescibacteria (326) |                                         | 0.08 ± 0.00                     | 0.02 ± 0.01 | 0.04 ± 0.02 | 0.08 ± 0.02 | 0.04 ± 0.01 | 0.07 ± 0.02 | 0.04 ± 0.01 |
| Uncultured Latescibacteria (342) |                                         | 0.06 ± 0.00                     | 0.02 ± 0.01 | 0.07 ± 0.01 | 0.05 ± 0.02 | 0.05 ± 0.01 | 0.03 ± 0.01 | 0.04 ± 0.00 |
| Uncultured Latescibacteria (453) |                                         | 0.00 ± 0.00                     | 0.02 ± 0.01 | 0.06 ± 0.01 | 0.03 ± 0.01 | 0.06 ± 0.00 | 0.03 ± 0.01 | 0.04 ± 0.00 |
| Uncultured Latescibacteria (503) |                                         | 0.03 ± 0.00                     | 0.00 ± 0.00 | 0.02 ± 0.01 | 0.06 ± 0.01 | 0.02 ± 0.00 | 0.03 ± 0.01 | 0.01 ± 0.01 |
| Uncultured Latescibacteria (534) |                                         | 0.02 ± 0.00                     | 0.02 ± 0.00 | 0.04 ± 0.01 | 0.06 ± 0.01 | 0.08 ± 0.02 | 0.03 ± 0.00 | 0.03 ± 0.01 |
| Uncultured Latescibacteria (706) |                                         | 0.01 ± 0.01                     | 0.01 ± 0.00 | 0.12 ± 0.03 | 0.02 ± 0.00 | 0.03 ± 0.01 | 0.01 ± 0.01 | 0.01 ± 0.00 |
| Uncultured Latescibacteria (732) |                                         | 0.01 ± 0.00                     | 0.00 ± 0.00 | 0.02 ± 0.00 | 0.02 ± 0.01 | 0.00 ± 0.00 | 0.01 ± 0.00 | 0.01 ± 0.00 |
| Uncultured Latescibacteria (864) |                                         | 0.01 ± 0.01                     | 0.00 ± 0.00 | 0.01 ± 0.01 | 0.01 ± 0.00 | 0.02 ± 0.01 | 0.01 ± 0.01 | 0.02 ± 0.01 |
| Uncultured Latescibacteria (422) |                                         | 0.07 ± 0.01                     | 0.05 ± 0.02 | 0.25 ± 0.04 | 0.10 ± 0.01 | 0.06 ± 0.01 | 0.05 ± 0.01 | 0.04 ± 0.00 |

|                     |                                           |             |             |             |             |             |             |             |
|---------------------|-------------------------------------------|-------------|-------------|-------------|-------------|-------------|-------------|-------------|
|                     | Uncultured Latescibacteria (1054)         | 0.00 ± 0.00 | 0.00 ± 0.00 | 0.01 ± 0.00 | 0.01 ± 0.01 | 0.02 ± 0.01 | 0.01 ± 0.01 | 0.01 ± 0.01 |
| Nitrospirae         | <i>Nitrospira</i> (7)                     | 0.85 ± 0.14 | 0.1 ± 0.01  | 0.22 ± 0.03 | 0.36 ± 0.03 | 0.29 ± 0.04 | 0.62 ± 0.06 | 0.29 ± 0.08 |
|                     | <i>Nitrospira</i> (23)                    | 1.12 ± 0.20 | 0.09 ± 0.02 | 0.36 ± 0.08 | 0.48 ± 0.14 | 0.15 ± 0.02 | 0.41 ± 0.08 | 0.20 ± 0.03 |
|                     | <i>Nitrospira</i> (26)                    | 0.70 ± 0.09 | 0.04 ± 0.01 | 0.32 ± 0.06 | 0.28 ± 0.03 | 0.13 ± 0.01 | 0.19 ± 0.09 | 0.06 ± 0.03 |
| Alphaproteobacteria | <i>Sphingobium</i> (17)                   | 0.61 ± 0.07 | 0.00 ± 0.00 | 0.00 ± 0.00 | 0.30 ± 0.28 | 0.08 ± 0.02 | 0.04 ± 0.02 | 0.04 ± 0.02 |
|                     | <i>Hyphomicrobium</i> (60)                | 0.35 ± 0.07 | 0.09 ± 0.02 | 0.30 ± 0.04 | 0.23 ± 0.02 | 0.29 ± 0.03 | 0.29 ± 0.00 | 0.23 ± 0.03 |
|                     | <i>Hyphomicrobium</i> (347)               | 0.06 ± 0.02 | 0.02 ± 0.00 | 0.04 ± 0.04 | 0.00 ± 0.00 | 0.08 ± 0.01 | 0.02 ± 0.02 | 0.07 ± 0.01 |
|                     | <i>Hirschia</i> (62)                      | 0.07 ± 0.02 | 0.05 ± 0.01 | 0.27 ± 0.04 | 0.25 ± 0.04 | 0.30 ± 0.03 | 0.36 ± 0.04 | 0.45 ± 0.20 |
|                     | <i>Novosphingobium</i> (64)               | 0.00 ± 0.00 | 0.02 ± 0.00 | 0.01 ± 0.01 | 0.05 ± 0.01 | 2.04 ± 0.78 | 0.51 ± 0.48 | 0.03 ± 0.02 |
|                     | <i>Pedomicrobium</i> (84)                 | 0.07 ± 0.01 | 0.08 ± 0.01 | 0.22 ± 0.02 | 0.15 ± 0.02 | 0.28 ± 0.03 | 0.26 ± 0.01 | 0.38 ± 0.06 |
|                     | Uncultured Rhizobiales (335)              | 0.16 ± 0.03 | 0.03 ± 0.01 | 0.10 ± 0.04 | 0.04 ± 0.01 | 0.13 ± 0.03 | 0.17 ± 0.04 | 0.15 ± 0.06 |
|                     | <i>Defluviimonas</i> (202)                | 0.00 ± 0.00 | 0.03 ± 0.00 | 0.10 ± 0.01 | 0.23 ± 0.03 | 0.15 ± 0.01 | 0.20 ± 0.03 | 0.13 ± 0.01 |
|                     | <i>Hyphomicrobium</i> (129)               | 0.09 ± 0.02 | 0.05 ± 0.00 | 0.16 ± 0.03 | 0.12 ± 0.01 | 0.26 ± 0.02 | 0.13 ± 0.00 | 0.19 ± 0.03 |
|                     | Uncultured AKYH478 (645)                  | 0.01 ± 0.00 | 0.00 ± 0.00 | 0.02 ± 0.01 | 0.03 ± 0.02 | 0.04 ± 0.00 | 0.06 ± 0.01 | 0.19 ± 0.06 |
|                     | Uncultured F0723 (1059)                   | 0.04 ± 0.01 | 0.01 ± 0.00 | 0.01 ± 0.00 | 0.00 ± 0.00 | 0.01 ± 0.00 | 0.03 ± 0.02 | 0.09 ± 0.03 |
|                     | Uncultured MNG7 (35)                      | 0.00 ± 0.00 | 0.20 ± 0.04 | 0.66 ± 0.11 | 0.75 ± 0.03 | 0.43 ± 0.02 | 0.89 ± 0.08 | 0.83 ± 0.13 |
|                     | Uncultured <i>Phyllobacteriaceae</i> (87) | 0.14 ± 0.02 | 0.04 ± 0.01 | 0.04 ± 0.01 | 0.04 ± 0.01 | 0.05 ± 0.01 | 0.16 ± 0.05 | 0.39 ± 0.12 |
|                     | Uncultured <i>Sphingomonadaceae</i> (1)   | 0.00 ± 0.00 | 0.13 ± 0.02 | 0.15 ± 0.03 | 1.30 ± 0.16 | 0.28 ± 0.02 | 6.16 ± 4.93 | 4.14 ± 1.16 |
|                     | Uncultured <i>Sphingomonadaceae</i> (119) | 0.00 ± 0.00 | 0.01 ± 0.01 | 0.05 ± 0.01 | 0.27 ± 0.02 | 0.18 ± 0.04 | 0.29 ± 0.01 | 0.26 ± 0.09 |
|                     | <i>Sphingopyxis</i> (553)                 | 0.02 ± 0.00 | 0.00 ± 0.00 | 0.09 ± 0.02 | 0.08 ± 0.01 | 0.01 ± 0.01 | 0.08 ± 0.00 | 0.01 ± 0.00 |
|                     | <i>Woodsholea</i> (181)                   | 0.07 ± 0.01 | 0.00 ± 0.00 | 0.11 ± 0.01 | 0.22 ± 0.03 | 0.25 ± 0.07 | 0.23 ± 0.04 | 0.09 ± 0.02 |
|                     | <i>Woodsholea</i> (183)                   | 0.01 ± 0.00 | 0.02 ± 0.00 | 0.16 ± 0.01 | 0.21 ± 0.03 | 0.15 ± 0.03 | 0.15 ± 0.02 | 0.10 ± 0.01 |
|                     | <i>Woodsholea</i> (615)                   | 0.04 ± 0.01 | 0.01 ± 0.00 | 0.05 ± 0.01 | 0.04 ± 0.01 | 0.04 ± 0.01 | 0.10 ± 0.02 | 0.02 ± 0.00 |
|                     | Uncultured <i>Rhizobiaceae</i> (100)      | 0.46 ± 0.10 | 0.02 ± 0.01 | 0.07 ± 0.02 | 0.19 ± 0.01 | 0.09 ± 0.02 | 0.21 ± 0.03 | 0.32 ± 0.19 |

|                     |                                          |             |             |             |             |             |             |             |
|---------------------|------------------------------------------|-------------|-------------|-------------|-------------|-------------|-------------|-------------|
|                     | Uncultured AKYH478 (645)                 | 0.01 ± 0.00 | 0.00 ± 0.00 | 0.02 ± 0.01 | 0.03 ± 0.02 | 0.04 ± 0.00 | 0.06 ± 0.01 | 0.19 ± 0.06 |
|                     | <i>Defluviimonas</i> (202)               | 0.00 ± 0.00 | 0.03 ± 0.00 | 0.10 ± 0.01 | 0.23 ± 0.03 | 0.15 ± 0.01 | 0.20 ± 0.03 | 0.13 ± 0.01 |
| Deltaproteobacteria | <i>Bdellovibrio</i> (63)                 | 0.05 ± 0.00 | 0.00 ± 0.00 | 0.00 ± 0.00 | 0.46 ± 0.11 | 0.00 ± 0.01 | 0.08 ± 0.00 | 0.11 ± 0.07 |
|                     | <i>Haliangium</i> (479)                  | 0.01 ± 0.00 | 0.00 ± 0.00 | 0.02 ± 0.00 | 0.04 ± 0.02 | 0.04 ± 0.01 | 0.01 ± 0.00 | 0.02 ± 0.00 |
|                     | <i>Haliangium</i> (248)                  | 0.00 ± 0.00 | 0.00 ± 0.00 | 0.00 ± 0.00 | 0.01 ± 0.00 | 0.08 ± 0.04 | 0.00 ± 0.00 | 0.12 ± 0.06 |
|                     | <i>Haliangium</i> (457)                  | 0.10 ± 0.02 | 0.00 ± 0.00 | 0.01 ± 0.00 | 0.02 ± 0.00 | 0.06 ± 0.01 | 0.01 ± 0.01 | 0.03 ± 0.02 |
|                     | <i>Haliangium</i> (739)                  | 0.00 ± 0.00 | 0.00 ± 0.00 | 0.01 ± 0.00 | 0.02 ± 0.01 | 0.02 ± 0.01 | 0.02 ± 0.01 | 0.02 ± 0.01 |
|                     | OM27-Clade (166)                         | 0.01 ± 0.00 | 0.00 ± 0.00 | 0.00 ± 0.00 | 0.01 ± 0.00 | 0.00 ± 0.00 | 0.11 ± 0.05 | 0.08 ± 0.07 |
|                     | <i>Anaeromyxobacter</i> (220)            | 0.15 ± 0.02 | 0.01 ± 0.00 | 0.02 ± 0.01 | 0.05 ± 0.02 | 0.05 ± 0.00 | 0.06 ± 0.01 | 0.06 ± 0.02 |
|                     | <i>Anaeromyxobacter</i> (82)             | 0.24 ± 0.02 | 0.16 ± 0.01 | 0.16 ± 0.01 | 0.17 ± 0.03 | 0.16 ± 0.01 | 0.14 ± 0.03 | 0.06 ± 0.02 |
|                     | <i>Sandaracinus</i> (260)                | 0.05 ± 0.01 | 0.00 ± 0.00 | 0.01 ± 0.00 | 0.05 ± 0.03 | 0.02 ± 0.01 | 0.02 ± 0.01 | 0.03 ± 0.02 |
|                     | <i>Sandaracinus</i> (382)                | 0.00 ± 0.00 | 0.00 ± 0.00 | 0.01 ± 0.01 | 0.04 ± 0.02 | 0.01 ± 0.00 | 0.02 ± 0.01 | 0.01 ± 0.00 |
|                     | <i>Sorangium</i> (709)                   | 0.01 ± 0.01 | 0.00 ± 0.00 | 0.03 ± 0.00 | 0.01 ± 0.01 | 0.01 ± 0.00 | 0.02 ± 0.00 | 0.00 ± 0.00 |
|                     | <i>Sorangium</i> (1348)                  | 0.00 ± 0.00 | 0.00 ± 0.00 | 0.01 ± 0.00 | 0.00 ± 0.00 | 0.01 ± 0.00 | 0.00 ± 0.00 | 0.00 ± 0.00 |
|                     | <i>Sorangium</i> (352)                   | 0.00 ± 0.00 | 0.01 ± 0.00 | 0.01 ± 0.00 | 0.00 ± 0.00 | 0.05 ± 0.02 | 0.00 ± 0.00 | 0.04 ± 0.02 |
|                     | Uncultured <i>Cystobacteraceae</i> (203) | 0.02 ± 0.00 | 0.00 ± 0.00 | 0.05 ± 0.01 | 0.02 ± 0.00 | 0.02 ± 0.00 | 0.05 ± 0.01 | 0.06 ± 0.02 |
|                     | Uncultured <i>Sandaracinaceae</i> (33)   | 0.16 ± 0.01 | 0.00 ± 0.00 | 0.11 ± 0.02 | 0.24 ± 0.05 | 0.21 ± 0.05 | 0.12 ± 0.04 | 0.04 ± 0.01 |
|                     | Uncultured <i>Sandaracinaceae</i> (404)  | 0.04 ± 0.01 | 0.00 ± 0.00 | 0.01 ± 0.00 | 0.05 ± 0.01 | 0.02 ± 0.00 | 0.01 ± 0.01 | 0.00 ± 0.00 |
|                     | Uncultured <i>Sandaracinaceae</i> (686)  | 0.07 ± 0.01 | 0.00 ± 0.00 | 0.00 ± 0.00 | 0.04 ± 0.01 | 0.00 ± 0.00 | 0.02 ± 0.01 | 0.00 ± 0.00 |
|                     | Uncultured <i>Sandaracinaceae</i> (240)  | 0.1 ± 0.03  | 0.00 ± 0.00 | 0.02 ± 0.01 | 0.06 ± 0.02 | 0.05 ± 0.02 | 0.09 ± 0.00 | 0.04 ± 0.01 |
|                     | Uncultured <i>Sandaracinaceae</i> (764)  | 0.01 ± 0.01 | 0.00 ± 0.00 | 0.00 ± 0.00 | 0.00 ± 0.00 | 0.01 ± 0.01 | 0.00 ± 0.00 | 0.00 ± 0.00 |
|                     | Uncultured Sh765B-TzT-29 (414)           | 0.05 ± 0.02 | 0.02 ± 0.01 | 0.10 ± 0.01 | 0.10 ± 0.01 | 0.06 ± 0.01 | 0.07 ± 0.02 | 0.09 ± 0.01 |
|                     | Uncultured $\delta$ -bacteria (105)      | 0.18 ± 0.02 | 0.00 ± 0.00 | 0.00 ± 0.00 | 0.00 ± 0.00 | 0.00 ± 0.00 | 0.00 ± 0.00 | 0.07 ± 0.05 |
|                     | Uncultured $\delta$ -bacteria (54)       | 0.37 ± 0.04 | 0.00 ± 0.00 | 0.00 ± 0.00 | 0.00 ± 0.00 | 0.04 ± 0.03 | 0.00 ± 0.00 | 0.02 ± 0.02 |





|                        |                                            |             |             |             |             |             |             |             |
|------------------------|--------------------------------------------|-------------|-------------|-------------|-------------|-------------|-------------|-------------|
|                        | <i>Acidiferrobacter</i> (67)               | 0.17 ± 0.03 | 0.16 ± 0.01 | 0.13 ± 0.05 | 0.48 ± 0.04 | 0.20 ± 0.05 | 0.53 ± 0.04 | 0.19 ± 0.06 |
|                        | <i>Arenimonas</i> (520)                    | 0.02 ± 0.01 | 0.00 ± 0.00 | 0.01 ± 0.00 | 0.06 ± 0.01 | 0.10 ± 0.01 | 0.03 ± 0.00 | 0.02 ± 0.01 |
|                        | <i>Arenimonas</i> (357)                    | 0.00 ± 0.00 | 0.00 ± 0.00 | 0.02 ± 0.01 | 0.25 ± 0.05 | 0.06 ± 0.01 | 0.25 ± 0.06 | 0.03 ± 0.01 |
|                        | <i>Pseudomonas</i> (24)                    | 0.09 ± 0.02 | 0.00 ± 0.00 | 0.08 ± 0.01 | 0.50 ± 0.12 | 0.15 ± 0.03 | 0.41 ± 0.06 | 0.08 ± 0.03 |
|                        | Uncultured <i>Pseudomonadaceae</i> (3)     | 0.00 ± 0.00 | 0.00 ± 0.00 | 0.00 ± 0.00 | 0.00 ± 0.00 | 0.00 ± 0.00 | 0.00 ± 0.00 | 0.00 ± 0.00 |
|                        | <i>Thermomonas</i> (58)                    | 0.07 ± 0.01 | 0.05 ± 0.01 | 0.06 ± 0.01 | 0.43 ± 0.14 | 0.32 ± 0.08 | 0.59 ± 0.07 | 0.37 ± 0.12 |
|                        | Uncultured <i>Xanthomonadaceae</i> (70)    | 0.05 ± 0.01 | 0.11 ± 0.04 | 0.41 ± 0.01 | 0.75 ± 0.07 | 0.21 ± 0.01 | 0.31 ± 0.02 | 0.47 ± 0.15 |
|                        | Uncultured $\gamma$ -proteobacteria (452)  | 0.00 ± 0.00 | 0.00 ± 0.00 | 0.01 ± 0.00 | 0.08 ± 0.02 | 0.02 ± 0.00 | 0.05 ± 0.02 | 0.01 ± 0.00 |
|                        | Uncultured $\gamma$ -proteobacteria (541)  | 0.02 ± 0.00 | 0.00 ± 0.00 | 0.00 ± 0.00 | 0.05 ± 0.01 | 0.02 ± 0.01 | 0.00 ± 0.00 | 0.00 ± 0.00 |
|                        | Uncultured $\gamma$ -proteobacteria (505)  | 0.04 ± 0.01 | 0.00 ± 0.00 | 0.03 ± 0.02 | 0.09 ± 0.03 | 0.01 ± 0.01 | 0.11 ± 0.01 | 0.02 ± 0.01 |
|                        | Uncultured $\gamma$ -proteobacteria (715)  | 0.01 ± 0.01 | 0.00 ± 0.00 | 0.02 ± 0.01 | 0.06 ± 0.02 | 0.02 ± 0.01 | 0.03 ± 0.01 | 0.00 ± 0.00 |
|                        | Uncultured $\gamma$ -proteobacteria (1758) | 0.00 ± 0.00 | 0.00 ± 0.00 | 0.00 ± 0.00 | 0.08 ± 0.06 | 0.04 ± 0.01 | 0.00 ± 0.00 | 0.00 ± 0.00 |
|                        | <i>Acidiferrobacter</i> (196)              | 0.02 ± 0.01 | 0.06 ± 0.01 | 0.08 ± 0.02 | 0.21 ± 0.03 | 0.21 ± 0.01 | 0.24 ± 0.02 | 0.15 ± 0.02 |
| Saccharibacteria       | Uncultured Saccharibacteria (980)          | 0.01 ± 0.00 | 0.00 ± 0.00 | 0.00 ± 0.00 | 0.13 ± 0.05 | 0.05 ± 0.01 | 0.05 ± 0.03 | 0.02 ± 0.01 |
| Verrucomicrobia        | <i>Prostheco bacter</i> (162)              | 0.20 ± 0.04 | 0.00 ± 0.00 | 0.02 ± 0.01 | 0.04 ± 0.02 | 0.05 ± 0.01 | 0.40 ± 0.02 | 0.10 ± 0.03 |
|                        | <i>Verrucomicrobium</i> (903)              | 0.01 ± 0.01 | 0.00 ± 0.00 | 0.00 ± 0.00 | 0.01 ± 0.01 | 0.01 ± 0.00 | 0.11 ± 0.03 | 0.20 ± 0.05 |
|                        | Uncultured DEV007 (1517)                   | 0.00 ± 0.00 | 0.00 ± 0.00 | 0.00 ± 0.00 | 0.00 ± 0.00 | 0.00 ± 0.00 | 0.00 ± 0.00 | 0.10 ± 0.03 |
| Unclassified           | Uncultured bacterium (315)                 | 0.01 ± 0.00 | 0.00 ± 0.00 | 0.01 ± 0.01 | 0.11 ± 0.04 | 0.42 ± 0.09 | 0.00 ± 0.00 | 0.00 ± 0.00 |
|                        | Uncultured bacterium (255)                 | 0.19 ± 0.02 | 0.00 ± 0.00 | 0.00 ± 0.00 | 0.01 ± 0.00 | 0.05 ± 0.02 | 0.03 ± 0.01 | 0.06 ± 0.05 |
|                        |                                            | <b>RNA</b>  |             |             |             |             |             |             |
| Phylum/Subphylum-level | Genus-level (OTU No.)                      | 0_0'        | 0_3'        | 0_5'        | 40_3'       | 40_5'       | 400_3'      | 400_5'      |
| Acidobacteria          | <i>Bryobacter</i> (144)                    | 0.06 ± 0.02 | 0.04 ± 0.01 | 0.15 ± 0.02 | 0.21 ± 0.01 | 0.21 ± 0.06 | 0.26 ± 0.02 | 0.12 ± 0.01 |
|                        | <i>Bryobacter</i> (61)                     | 0.27 ± 0.05 | 0.14 ± 0.06 | 0.51 ± 0.08 | 0.62 ± 0.03 | 0.33 ± 0.03 | 0.63 ± 0.01 | 0.52 ± 0.10 |

|                |                                      |             |             |             |             |             |             |             |
|----------------|--------------------------------------|-------------|-------------|-------------|-------------|-------------|-------------|-------------|
|                | <i>Bryobacter</i> (115)              | 0.11 ± 0.03 | 0.06 ± 0.03 | 0.55 ± 0.11 | 0.16 ± 0.02 | 0.29 ± 0.09 | 0.15 ± 0.06 | 0.28 ± 0.04 |
|                | <i>Bryobacter</i> (562)              | 0.01 ± 0.00 | 0.01 ± 0.00 | 0.03 ± 0.01 | 0.04 ± 0.01 | 0.04 ± 0.00 | 0.08 ± 0.02 | 0.13 ± 0.03 |
|                | Uncultured subgroup_3 (901)          | 0.02 ± 0.01 | 0.00 ± 0.00 | 0.03 ± 0.00 | 0.04 ± 0.01 | 0.02 ± 0.01 | 0.07 ± 0.02 | 0.04 ± 0.01 |
|                | Uncultured subgroup_3 (55)           | 0.47 ± 0.04 | 0.20 ± 0.13 | 0.81 ± 0.01 | 0.39 ± 0.03 | 0.33 ± 0.08 | 0.66 ± 0.05 | 0.65 ± 0.14 |
|                | Uncultured subgroup_3 (516)          | 0.04 ± 0.00 | 0.01 ± 0.01 | 0.06 ± 0.01 | 0.09 ± 0.01 | 0.04 ± 0.01 | 0.09 ± 0.00 | 0.08 ± 0.01 |
|                | <i>Blastocatella</i> (126)           | 0.03 ± 0.01 | 0.03 ± 0.01 | 0.05 ± 0.01 | 0.03 ± 0.01 | 0.05 ± 0.02 | 0.05 ± 0.02 | 0.12 ± 0.02 |
|                | Uncultured subgroup_6 (85)           | 0.00 ± 0.01 | 0.02 ± 0.00 | 0.02 ± 0.01 | 0.07 ± 0.02 | 0.06 ± 0.01 | 0.06 ± 0.03 | 0.47 ± 0.16 |
|                | Uncultured subgroup_6 (10)           | 0.14 ± 0.02 | 0.18 ± 0.04 | 1.21 ± 0.27 | 0.79 ± 0.07 | 1.34 ± 0.18 | 0.94 ± 0.24 | 1.56 ± 0.44 |
|                | Uncultured subgroup_6 (212)          | 0.03 ± 0.01 | 0.01 ± 0.00 | 0.15 ± 0.02 | 0.21 ± 0.05 | 0.23 ± 0.01 | 0.25 ± 0.10 | 0.14 ± 0.05 |
|                | Uncultured subgroup_6 (304)          | 0.01 ± 0.00 | 0.02 ± 0.00 | 0.06 ± 0.00 | 0.15 ± 0.03 | 0.19 ± 0.05 | 0.09 ± 0.01 | 0.12 ± 0.04 |
|                | Uncultured subgroup_6 (401)          | 0.01 ± 0.00 | 0.01 ± 0.00 | 0.04 ± 0.02 | 0.06 ± 0.01 | 0.06 ± 0.01 | 0.07 ± 0.03 | 0.06 ± 0.01 |
|                | Uncultured subgroup_6 (581)          | 0.03 ± 0.02 | 0.00 ± 0.00 | 0.17 ± 0.05 | 0.08 ± 0.02 | 0.04 ± 0.01 | 0.05 ± 0.00 | 0.04 ± 0.01 |
|                | Uncultured subgroup_6 (412)          | 0.01 ± 0.00 | 0.01 ± 0.00 | 0.06 ± 0.01 | 0.04 ± 0.01 | 0.08 ± 0.00 | 0.06 ± 0.00 | 0.03 ± 0.01 |
|                | Uncultured subgroup_6 (147)          | 0.01 ± 0.00 | 0.06 ± 0.02 | 0.01 ± 0.00 | 0.06 ± 0.02 | 0.15 ± 0.04 | 0.09 ± 0.01 | 0.08 ± 0.02 |
|                | Uncultured subgroup_6 (85)           | 0.00 ± 0.00 | 0.02 ± 0.00 | 0.02 ± 0.01 | 0.07 ± 0.02 | 0.06 ± 0.01 | 0.06 ± 0.03 | 0.47 ± 0.16 |
|                | Uncultured subgroup_17 (39)          | 0.07 ± 0.00 | 0.07 ± 0.03 | 0.41 ± 0.03 | 0.39 ± 0.05 | 0.34 ± 0.01 | 0.41 ± 0.09 | 0.30 ± 0.11 |
|                | Uncultured subgroup_22 (329)         | 0.03 ± 0.00 | 0.01 ± 0.00 | 0.10 ± 0.03 | 0.12 ± 0.03 | 0.21 ± 0.01 | 0.06 ± 0.01 | 0.06 ± 0.02 |
|                | Uncultured subgroup_22 (340)         | 0.03 ± 0.00 | 0.02 ± 0.02 | 0.24 ± 0.07 | 0.13 ± 0.03 | 0.10 ± 0.00 | 0.11 ± 0.02 | 0.05 ± 0.02 |
|                | Uncultured subgroup_22 (57)          | 0.10 ± 0.05 | 0.07 ± 0.03 | 0.47 ± 0.09 | 0.71 ± 0.25 | 0.43 ± 0.05 | 0.89 ± 0.18 | 0.54 ± 0.02 |
| Actinobacteria | Uncultured Sva0996_marine_group (83) | 0.01 ± 0.00 | 0.01 ± 0.00 | 0.05 ± 0.02 | 0.05 ± 0.01 | 0.12 ± 0.03 | 0.07 ± 0.02 | 0.09 ± 0.08 |
|                | <i>Aeromicrobium</i> (332)           | 0.00 ± 0.00 | 0.00 ± 0.00 | 0.00 ± 0.00 | 0.00 ± 0.00 | 0.01 ± 0.00 | 0.00 ± 0.00 | 0.04 ± 0.02 |
|                | <i>Marmoricola</i> (69)              | 0.04 ± 0.01 | 0.04 ± 0.01 | 0.03 ± 0.00 | 0.13 ± 0.02 | 0.13 ± 0.00 | 0.04 ± 0.00 | 0.12 ± 0.06 |
|                | <i>Nocardioides</i> (372)            | 0.01 ± 0.00 | 0.00 ± 0.01 | 0.00 ± 0.00 | 0.00 ± 0.00 | 0.00 ± 0.00 | 0.01 ± 0.00 | 0.01 ± 0.01 |
|                | <i>Nocardioides</i> (210)            | 0.00 ± 0.00 | 0.01 ± 0.00 | 0.01 ± 0.00 | 0.05 ± 0.01 | 0.09 ± 0.02 | 0.01 ± 0.01 | 0.08 ± 0.04 |

|                 |                                           |             |             |             |             |             |             |             |
|-----------------|-------------------------------------------|-------------|-------------|-------------|-------------|-------------|-------------|-------------|
|                 | <i>Nocardioides</i> (102)                 | 0.03 ± 0.00 | 0.02 ± 0.01 | 0.03 ± 0.01 | 0.06 ± 0.02 | 0.02 ± 0.01 | 0.03 ± 0.01 | 0.04 ± 0.01 |
|                 | Uncultured MB-A2-108 (94)                 | 0.02 ± 0.00 | 0.01 ± 0.00 | 0.10 ± 0.01 | 0.17 ± 0.02 | 0.10 ± 0.01 | 0.14 ± 0.04 | 0.07 ± 0.02 |
|                 | <i>Iamia</i> (188)                        | 0.01 ± 0.00 | 0.01 ± 0.01 | 0.02 ± 0.01 | 0.12 ± 0.01 | 0.06 ± 0.01 | 0.14 ± 0.05 | 0.06 ± 0.01 |
|                 | <i>Iamia</i> (362)                        | 0.01 ± 0.00 | 0.00 ± 0.00 | 0.01 ± 0.00 | 0.02 ± 0.00 | 0.04 ± 0.01 | 0.00 ± 0.00 | 0.03 ± 0.01 |
|                 | Uncultured Acidimicrobiales (1265)        | 0.00 ± 0.00 | 0.00 ± 0.00 | 0.00 ± 0.00 | 0.03 ± 0.01 | 0.00 ± 0.00 | 0.02 ± 0.02 | 0.00 ± 0.00 |
|                 | Uncultured 480-2(627)                     | 0.01 ± 0.01 | 0.00 ± 0.00 | 0.00 ± 0.00 | 0.02 ± 0.01 | 0.03 ± 0.01 | 0.01 ± 0.00 | 0.00 ± 0.00 |
|                 | <i>Solirubrobacter</i> (29)               | 0.02 ± 0.01 | 0.01 ± 0.00 | 0.02 ± 0.01 | 0.07 ± 0.02 | 0.08 ± 0.00 | 0.03 ± 0.00 | 0.04 ± 0.01 |
|                 | Sva0996_marine_group(441)                 | 0.01 ± 0.00 | 0.01 ± 0.01 | 0.06 ± 0.02 | 0.12 ± 0.02 | 0.09 ± 0.02 | 0.15 ± 0.08 | 0.11 ± 0.03 |
|                 | <i>Flavobacterium</i> (633)               | 0.00 ± 0.00 | 0.00 ± 0.00 | 0.00 ± 0.00 | 0.02 ± 0.00 | 0.00 ± 0.00 | 0.04 ± 0.02 | 0.00 ± 0.00 |
|                 | <i>Flavobacterium</i> (2394)              | 0.00 ± 0.00 | 0.00 ± 0.00 | 0.00 ± 0.00 | 0.00 ± 0.00 | 0.00 ± 0.00 | 0.02 ± 0.02 | 0.00 ± 0.00 |
|                 | Uncultured NS9_marine_group (438)         | 0.01 ± 0.01 | 0.01 ± 0.01 | 0.05 ± 0.02 | 0.03 ± 0.02 | 0.01 ± 0.00 | 0.13 ± 0.10 | 0.10 ± 0.06 |
|                 | Uncultured NS9_marine_group (277)         | 0.03 ± 0.01 | 0.02 ± 0.01 | 0.04 ± 0.01 | 0.04 ± 0.01 | 0.03 ± 0.01 | 0.21 ± 0.17 | 0.09 ± 0.03 |
|                 | <i>Rhodococcus</i> (459)                  | 0.00 ± 0.00 | 0.00 ± 0.00 | 0.07 ± 0.01 | 0.05 ± 0.04 | 0.08 ± 0.03 | 0.08 ± 0.02 | 0.10 ± 0.04 |
|                 | <i>Fodinicola</i> (15)                    | 0.13 ± 0.04 | 0.13 ± 0.06 | 0.28 ± 0.02 | 0.59 ± 0.02 | 0.38 ± 0.06 | 0.55 ± 0.01 | 0.19 ± 0.05 |
|                 | <i>Nocardioides</i> (405)                 | 0.01 ± 0.00 | 0.01 ± 0.00 | 0.02 ± 0.01 | 0.01 ± 0.00 | 0.01 ± 0.00 | 0.01 ± 0.01 | 0.02 ± 0.01 |
|                 | Uncultured Acidimicrobiales (612)         | 0.01 ± 0.00 | 0.00 ± 0.00 | 0.07 ± 0.02 | 0.07 ± 0.01 | 0.02 ± 0.01 | 0.03 ± 0.01 | 0.03 ± 0.01 |
|                 | Uncultured Actinobacteria (359)           | 0.01 ± 0.01 | 0.01 ± 0.00 | 0.02 ± 0.01 | 0.07 ± 0.01 | 0.01 ± 0.01 | 0.05 ± 0.01 | 0.02 ± 0.02 |
|                 | Uncultured MB-A2-108 (137)                | 0.03 ± 0.01 | 0.01 ± 0.01 | 0.12 ± 0.01 | 0.23 ± 0.03 | 0.13 ± 0.03 | 0.22 ± 0.03 | 0.06 ± 0.01 |
|                 | CL500-29_marine_group (28)                | 0.02 ± 0.01 | 0.05 ± 0.01 | 0.04 ± 0.01 | 0.10 ± 0.01 | 0.12 ± 0.00 | 0.13 ± 0.01 | 1.34 ± 0.14 |
|                 | Uncultured Acidimicrobiales (569)         | 0.01 ± 0.00 | 0.01 ± 0.00 | 0.00 ± 0.00 | 0.07 ± 0.01 | 0.03 ± 0.01 | 0.04 ± 0.02 | 0.00 ± 0.00 |
|                 | Uncultured <i>Intrasporangiaceae</i> (19) | 0.07 ± 0.02 | 0.17 ± 0.03 | 0.06 ± 0.01 | 0.19 ± 0.02 | 0.15 ± 0.01 | 0.16 ± 0.01 | 0.10 ± 0.02 |
|                 | <i>Gaiella</i> (45)                       | 0.05 ± 0.01 | 0.11 ± 0.06 | 0.13 ± 0.01 | 0.24 ± 0.02 | 0.43 ± 0.02 | 0.16 ± 0.01 | 0.19 ± 0.04 |
| Armatimonadetes | Uncultured Armatimonadetes (371)          | 0.00 ± 0.00 | 0.00 ± 0.00 | 0.00 ± 0.00 | 0.00 ± 0.00 | 0.03 ± 0.02 | 0.00 ± 0.00 | 0.18 ± 0.01 |
| Bacteroidetes   | <i>Chryseolinea</i> (165)                 | 0.01 ± 0.00 | 0.00 ± 0.00 | 0.02 ± 0.01 | 0.05 ± 0.01 | 0.02 ± 0.01 | 0.03 ± 0.01 | 0.03 ± 0.00 |

|                                         |             |             |             |             |             |             |             |
|-----------------------------------------|-------------|-------------|-------------|-------------|-------------|-------------|-------------|
| <i>Chryseolinea</i> (483)               | 0.01 ± 0.00 | 0.01 ± 0.01 | 0.00 ± 0.00 | 0.02 ± 0.00 | 0.02 ± 0.01 | 0.02 ± 0.00 | 0.01 ± 0.01 |
| <i>Chryseolinea</i> (231)               | 0.04 ± 0.01 | 0.02 ± 0.01 | 0.01 ± 0.00 | 0.06 ± 0.01 | 0.03 ± 0.01 | 0.05 ± 0.02 | 0.03 ± 0.00 |
| <i>Chryseolinea</i> (1195)              | 0.02 ± 0.01 | 0.00 ± 0.00 | 0.01 ± 0.00 | 0.01 ± 0.01 | 0.00 ± 0.00 | 0.01 ± 0.00 | 0.00 ± 0.00 |
| Uncultured <i>Rhodothermaceae</i> (363) | 0.00 ± 0.00 | 0.00 ± 0.00 | 0.00 ± 0.00 | 0.01 ± 0.00 | 0.12 ± 0.02 | 0.02 ± 0.01 | 0.09 ± 0.07 |
| <i>Ferruginibacter</i> (499)            | 0.00 ± 0.00 | 0.01 ± 0.01 | 0.00 ± 0.00 | 0.02 ± 0.01 | 0.01 ± 0.01 | 0.04 ± 0.02 | 0.06 ± 0.02 |
| <i>Ferruginibacter</i> (378)            | 0.01 ± 0.01 | 0.00 ± 0.00 | 0.00 ± 0.00 | 0.02 ± 0.00 | 0.01 ± 0.00 | 0.02 ± 0.01 | 0.04 ± 0.02 |
| <i>Flavobacterium</i> (2394)            | 0.00 ± 0.00 | 0.00 ± 0.00 | 0.00 ± 0.00 | 0.00 ± 0.00 | 0.00 ± 0.00 | 0.02 ± 0.02 | 0.00 ± 0.00 |
| <i>Flavobacterium</i> (376)             | 0.00 ± 0.00 | 0.00 ± 0.00 | 0.00 ± 0.00 | 0.04 ± 0.01 | 0.01 ± 0.01 | 0.01 ± 0.00 | 0.00 ± 0.00 |
| Uncultured <i>Cytophagaceae</i> (451)   | 0.00 ± 0.00 | 0.01 ± 0.00 | 0.01 ± 0.00 | 0.01 ± 0.01 | 0.00 ± 0.00 | 0.00 ± 0.00 | 0.01 ± 0.00 |
| <i>Ferruginibacter</i> (256)            | 0.01 ± 0.00 | 0.02 ± 0.01 | 0.01 ± 0.00 | 0.03 ± 0.01 | 0.02 ± 0.00 | 0.02 ± 0.00 | 0.06 ± 0.02 |
| Uncultured <i>Saprospiraceae</i> (380)  | 0.00 ± 0.00 | 0.01 ± 0.01 | 0.03 ± 0.02 | 0.03 ± 0.00 | 0.04 ± 0.02 | 0.09 ± 0.04 | 0.12 ± 0.04 |
| Uncultured <i>Saprospiraceae</i> (383)  | 0.00 ± 0.00 | 0.00 ± 0.00 | 0.00 ± 0.00 | 0.01 ± 0.00 | 0.02 ± 0.01 | 0.01 ± 0.01 | 0.01 ± 0.00 |
| Uncultured <i>Saprospiraceae</i> (472)  | 0.00 ± 0.00 | 0.00 ± 0.00 | 0.00 ± 0.00 | 0.01 ± 0.00 | 0.01 ± 0.00 | 0.03 ± 0.02 | 0.10 ± 0.05 |
| Uncultured Sphingobacteriales (711)     | 0.00 ± 0.00 | 0.00 ± 0.00 | 0.00 ± 0.00 | 0.00 ± 0.00 | 0.00 ± 0.00 | 0.01 ± 0.01 | 0.01 ± 0.01 |
| Uncultured env.OPS_17 (726)             | 0.00 ± 0.00 | 0.00 ± 0.00 | 0.00 ± 0.00 | 0.01 ± 0.00 | 0.00 ± 0.00 | 0.05 ± 0.01 | 0.00 ± 0.00 |
| Uncultured env.OPS_17 (876)             | 0.00 ± 0.00 | 0.00 ± 0.00 | 0.00 ± 0.00 | 0.02 ± 0.00 | 0.00 ± 0.00 | 0.02 ± 0.00 | 0.00 ± 0.00 |
| Uncultured env.OPS_17 (548)             | 0.03 ± 0.01 | 0.00 ± 0.00 | 0.02 ± 0.00 | 0.01 ± 0.00 | 0.20 ± 0.00 | 0.00 ± 0.00 | 0.55 ± 0.51 |
| Uncultured KD3-93 (46)                  | 0.00 ± 0.00 | 0.00 ± 0.00 | 0.01 ± 0.01 | 0.69 ± 0.15 | 0.05 ± 0.00 | 2.92 ± 1.93 | 0.32 ± 0.16 |
| NS11-12_marine_group (616)              | 0.00 ± 0.00 | 0.00 ± 0.00 | 0.00 ± 0.00 | 0.01 ± 0.00 | 0.01 ± 0.00 | 0.02 ± 0.01 | 0.01 ± 0.01 |
| PHOS-HE51 (1186)                        | 0.00 ± 0.00 | 0.00 ± 0.00 | 0.00 ± 0.00 | 0.00 ± 0.00 | 0.00 ± 0.00 | 0.03 ± 0.02 | 0.05 ± 0.01 |
| Uncultured Sphingobacteriales (409)     | 0.00 ± 0.00 | 0.00 ± 0.00 | 0.00 ± 0.00 | 0.00 ± 0.00 | 0.12 ± 0.07 | 0.02 ± 0.01 | 0.41 ± 0.16 |
| <i>Terrimonas</i> (139)                 | 0.01 ± 0.00 | 0.01 ± 0.00 | 0.00 ± 0.00 | 0.02 ± 0.01 | 0.01 ± 0.00 | 0.02 ± 0.01 | 0.06 ± 0.03 |
| <i>Terrimonas</i> (149)                 | 0.01 ± 0.00 | 0.01 ± 0.00 | 0.01 ± 0.01 | 0.02 ± 0.01 | 0.00 ± 0.00 | 0.03 ± 0.01 | 0.02 ± 0.01 |
| <i>Terrimonas</i> (253)                 | 0.02 ± 0.01 | 0.02 ± 0.00 | 0.03 ± 0.01 | 0.03 ± 0.01 | 0.02 ± 0.01 | 0.03 ± 0.01 | 0.01 ± 0.01 |

|                  |                                           |             |             |             |             |             |             |             |
|------------------|-------------------------------------------|-------------|-------------|-------------|-------------|-------------|-------------|-------------|
| Cand_div_BRC1    | Uncultured Candidate_div_BRC1 (542)       | 0.01 ± 0.00 | 0.00 ± 0.00 | 0.13 ± 0.08 | 0.22 ± 0.10 | 0.03 ± 0.01 | 0.05 ± 0.03 | 0.01 ± 0.00 |
|                  | Uncultured Candidate_div_BRC1 (1346)      | 0.00 ± 0.00 | 0.00 ± 0.00 | 0.04 ± 0.02 | 0.09 ± 0.04 | 0.00 ± 0.00 | 0.02 ± 0.01 | 0.03 ± 0.02 |
| Gemmatimonadetes | Uncultured <i>Gemmatimonadaceae</i> (124) | 0.01 ± 0.01 | 0.01 ± 0.01 | 0.14 ± 0.03 | 0.32 ± 0.06 | 0.23 ± 0.05 | 0.29 ± 0.03 | 0.26 ± 0.05 |
|                  | Uncultured <i>Gemmatimonadaceae</i> (32)  | 0.03 ± 0.01 | 0.06 ± 0.05 | 0.21 ± 0.03 | 0.77 ± 0.17 | 0.67 ± 0.12 | 0.64 ± 0.07 | 0.14 ± 0.03 |
|                  | Uncultured <i>Gemmatimonadaceae</i> (52)  | 0.02 ± 0.00 | 0.06 ± 0.04 | 0.28 ± 0.03 | 0.57 ± 0.10 | 0.56 ± 0.05 | 0.46 ± 0.09 | 0.37 ± 0.04 |
|                  | Uncultured <i>Gemmatimonadaceae</i> (251) | 0.01 ± 0.01 | 0.01 ± 0.00 | 0.07 ± 0.02 | 0.22 ± 0.05 | 0.18 ± 0.04 | 0.28 ± 0.07 | 0.08 ± 0.01 |
|                  | Uncultured <i>Gemmatimonadaceae</i> (269) | 0.02 ± 0.00 | 0.00 ± 0.00 | 0.09 ± 0.02 | 0.15 ± 0.03 | 0.11 ± 0.01 | 0.17 ± 0.03 | 0.12 ± 0.03 |
|                  | Uncultured <i>Gemmatimonadaceae</i> (299) | 0.00 ± 0.00 | 0.01 ± 0.00 | 0.01 ± 0.00 | 0.05 ± 0.01 | 0.15 ± 0.02 | 0.09 ± 0.07 | 0.10 ± 0.08 |
|                  | Uncultured <i>Gemmatimonadaceae</i> (388) | 0.02 ± 0.00 | 0.01 ± 0.01 | 0.06 ± 0.03 | 0.09 ± 0.00 | 0.11 ± 0.00 | 0.09 ± 0.02 | 0.05 ± 0.04 |
| Chlorobi         | Uncultured BSV26 (580)                    | 0.05 ± 0.02 | 0.01 ± 0.01 | 0.06 ± 0.01 | 0.06 ± 0.02 | 0.04 ± 0.02 | 0.05 ± 0.00 | 0.02 ± 0.01 |
|                  | Uncultured BSV26 (93)                     | 0.02 ± 0.01 | 0.01 ± 0.00 | 0.05 ± 0.01 | 0.06 ± 0.01 | 0.04 ± 0.02 | 0.04 ± 0.00 | 0.03 ± 0.01 |
|                  | Uncultured BSV26 (413)                    | 0.03 ± 0.02 | 0.02 ± 0.01 | 0.02 ± 0.01 | 0.06 ± 0.01 | 0.05 ± 0.00 | 0.08 ± 0.00 | 0.06 ± 0.01 |
|                  | Uncultured OPB56 (740)                    | 0.02 ± 0.01 | 0.00 ± 0.00 | 0.05 ± 0.02 | 0.12 ± 0.02 | 0.01 ± 0.00 | 0.13 ± 0.11 | 0.03 ± 0.01 |
|                  | Uncultured SJA-28 (284)                   | 0.02 ± 0.00 | 0.02 ± 0.01 | 0.03 ± 0.01 | 0.01 ± 0.00 | 0.01 ± 0.00 | 0.00 ± 0.00 | 0.02 ± 0.01 |
| Chloroflexi      | Uncultured <i>Caldilineaceae</i> (110)    | 0.01 ± 0.00 | 0.01 ± 0.00 | 0.22 ± 0.05 | 0.12 ± 0.01 | 0.03 ± 0.02 | 0.05 ± 0.02 | 0.10 ± 0.02 |
|                  | Uncultured KD4-96 (27)                    | 0.05 ± 0.01 | 0.07 ± 0.02 | 0.16 ± 0.04 | 0.39 ± 0.05 | 0.26 ± 0.02 | 0.30 ± 0.04 | 0.39 ± 0.00 |
|                  | Uncultured <i>Anaerolineaceae</i> (233)   | 0.02 ± 0.01 | 0.01 ± 0.01 | 0.08 ± 0.03 | 0.06 ± 0.02 | 0.21 ± 0.00 | 0.05 ± 0.00 | 0.14 ± 0.03 |
|                  | Uncultured <i>Anaerolineaceae</i> (611)   | 0.00 ± 0.00 | 0.00 ± 0.00 | 0.01 ± 0.00 | 0.01 ± 0.00 | 0.06 ± 0.02 | 0.00 ± 0.00 | 0.12 ± 0.03 |
|                  | Uncultured <i>Anaerolineaceae</i> (628)   | 0.00 ± 0.00 | 0.01 ± 0.00 | 0.02 ± 0.01 | 0.02 ± 0.00 | 0.11 ± 0.00 | 0.00 ± 0.00 | 0.06 ± 0.03 |
|                  | Unclassified Gitt-GS-136 (127)            | 0.01 ± 0.00 | 0.02 ± 0.01 | 0.05 ± 0.01 | 0.08 ± 0.02 | 0.14 ± 0.05 | 0.04 ± 0.01 | 0.10 ± 0.04 |
|                  | Uncultured KD4-96 (96)                    | 0.04 ± 0.00 | 0.02 ± 0.01 | 0.06 ± 0.02 | 0.11 ± 0.01 | 0.14 ± 0.02 | 0.12 ± 0.02 | 0.08 ± 0.01 |
|                  | Unclassified JG30-KF-CM45 (145)           | 0.01 ± 0.01 | 0.02 ± 0.01 | 0.08 ± 0.02 | 0.10 ± 0.01 | 0.16 ± 0.01 | 0.24 ± 0.16 | 0.27 ± 0.11 |
|                  | Uncultured KD4-96 (8)                     | 0.26 ± 0.05 | 0.32 ± 0.12 | 0.48 ± 0.12 | 1.35 ± 0.08 | 0.45 ± 0.00 | 1.13 ± 0.08 | 0.47 ± 0.06 |
|                  | Uncultured KD4-96 (16)                    | 0.11 ± 0.03 | 0.16 ± 0.02 | 0.16 ± 0.07 | 0.62 ± 0.05 | 0.48 ± 0.08 | 0.49 ± 0.08 | 0.54 ± 0.02 |

|                     |                                   |             |             |             |             |             |             |             |
|---------------------|-----------------------------------|-------------|-------------|-------------|-------------|-------------|-------------|-------------|
| Latescibacteria     | Uncultured Latescibacteria (95)   | 0.06 ± 0.03 | 0.01 ± 0.00 | 0.51 ± 0.15 | 0.57 ± 0.11 | 0.27 ± 0.03 | 0.49 ± 0.06 | 0.25 ± 0.11 |
|                     | Uncultured Latescibacteria (154)  | 0.01 ± 0.00 | 0.00 ± 0.00 | 0.35 ± 0.12 | 0.40 ± 0.05 | 0.23 ± 0.08 | 0.35 ± 0.03 | 0.31 ± 0.15 |
|                     | Uncultured Latescibacteria (308)  | 0.01 ± 0.00 | 0.01 ± 0.01 | 0.01 ± 0.01 | 0.04 ± 0.01 | 0.12 ± 0.05 | 0.03 ± 0.01 | 0.20 ± 0.07 |
|                     | Uncultured Latescibacteria (326)  | 0.02 ± 0.01 | 0.00 ± 0.00 | 0.11 ± 0.03 | 0.18 ± 0.02 | 0.14 ± 0.06 | 0.13 ± 0.00 | 0.08 ± 0.03 |
|                     | Uncultured Latescibacteria (342)  | 0.04 ± 0.02 | 0.02 ± 0.01 | 0.08 ± 0.01 | 0.13 ± 0.05 | 0.11 ± 0.01 | 0.04 ± 0.00 | 0.07 ± 0.02 |
|                     | Uncultured Latescibacteria (453)  | 0.00 ± 0.00 | 0.01 ± 0.00 | 0.13 ± 0.01 | 0.09 ± 0.02 | 0.09 ± 0.01 | 0.08 ± 0.01 | 0.07 ± 0.02 |
|                     | Uncultured Latescibacteria (503)  | 0.02 ± 0.01 | 0.00 ± 0.00 | 0.11 ± 0.03 | 0.13 ± 0.03 | 0.08 ± 0.00 | 0.10 ± 0.02 | 0.06 ± 0.03 |
|                     | Uncultured Latescibacteria (534)  | 0.01 ± 0.00 | 0.00 ± 0.00 | 0.04 ± 0.01 | 0.05 ± 0.01 | 0.16 ± 0.05 | 0.01 ± 0.01 | 0.03 ± 0.02 |
|                     | Uncultured Latescibacteria (706)  | 0.02 ± 0.01 | 0.00 ± 0.00 | 0.19 ± 0.01 | 0.07 ± 0.01 | 0.02 ± 0.00 | 0.04 ± 0.01 | 0.02 ± 0.00 |
|                     | Uncultured Latescibacteria (732)  | 0.00 ± 0.00 | 0.00 ± 0.00 | 0.09 ± 0.02 | 0.10 ± 0.03 | 0.06 ± 0.03 | 0.04 ± 0.00 | 0.02 ± 0.01 |
|                     | Uncultured Latescibacteria (864)  | 0.02 ± 0.00 | 0.00 ± 0.00 | 0.02 ± 0.00 | 0.05 ± 0.01 | 0.09 ± 0.02 | 0.06 ± 0.01 | 0.05 ± 0.01 |
|                     | Uncultured Latescibacteria (422)  | 0.01 ± 0.00 | 0.00 ± 0.00 | 0.28 ± 0.06 | 0.10 ± 0.02 | 0.06 ± 0.00 | 0.07 ± 0.01 | 0.04 ± 0.02 |
|                     | Uncultured Latescibacteria (1054) | 0.00 ± 0.00 | 0.00 ± 0.00 | 0.04 ± 0.01 | 0.05 ± 0.01 | 0.04 ± 0.00 | 0.02 ± 0.01 | 0.02 ± 0.01 |
| Nitrospirae         | <i>Nitrospira</i> (7)             | 0.79 ± 0.18 | 0.47 ± 0.09 | 1.02 ± 0.09 | 0.89 ± 0.12 | 1.57 ± 0.20 | 2.32 ± 0.61 | 1.44 ± 0.22 |
|                     | <i>Nitrospira</i> (23)            | 0.49 ± 0.04 | 0.39 ± 0.08 | 1.86 ± 0.58 | 0.77 ± 0.12 | 1.51 ± 0.17 | 0.74 ± 0.07 | 0.80 ± 0.20 |
|                     | <i>Nitrospira</i> (26)            | 0.52 ± 0.02 | 0.61 ± 0.03 | 1.36 ± 0.13 | 1.16 ± 0.16 | 0.73 ± 0.12 | 0.91 ± 0.38 | 0.42 ± 0.21 |
| Alphaproteobacteria | <i>Sphingobium</i> (17)           | 0.00 ± 0.00 | 0.00 ± 0.00 | 0.00 ± 0.00 | 0.12 ± 0.11 | 0.05 ± 0.00 | 0.03 ± 0.02 | 0.02 ± 0.01 |
|                     | <i>Hyphomicrobium</i> (60)        | 0.22 ± 0.04 | 0.23 ± 0.02 | 0.44 ± 0.08 | 0.27 ± 0.06 | 0.38 ± 0.06 | 0.22 ± 0.02 | 0.59 ± 0.10 |
|                     | <i>Hyphomicrobium</i> (347)       | 0.00 ± 0.00 | 0.00 ± 0.00 | 0.16 ± 0.04 | 0.08 ± 0.01 | 0.13 ± 0.06 | 0.09 ± 0.01 | 0.19 ± 0.06 |
|                     | <i>Hirschia</i> (62)              | 0.09 ± 0.01 | 0.16 ± 0.06 | 0.34 ± 0.11 | 0.15 ± 0.00 | 0.55 ± 0.01 | 0.14 ± 0.01 | 1.18 ± 0.76 |
|                     | <i>Novosphingobium</i> (64)       | 0.01 ± 0.01 | 0.01 ± 0.00 | 0.01 ± 0.00 | 0.01 ± 0.00 | 0.62 ± 0.10 | 0.14 ± 0.01 | 0.03 ± 0.02 |
|                     | <i>Pedomicrobium</i> (84)         | 0.09 ± 0.02 | 0.07 ± 0.02 | 0.15 ± 0.03 | 0.21 ± 0.03 | 0.08 ± 0.00 | 0.30 ± 0.00 | 0.48 ± 0.22 |
|                     | Uncultured Rhizobiales (335)      | 0.01 ± 0.00 | 0.02 ± 0.01 | 0.03 ± 0.01 | 0.01 ± 0.00 | 0.03 ± 0.02 | 0.01 ± 0.01 | 0.04 ± 0.04 |
|                     | <i>Defluviimonas</i> (202)        | 0.06 ± 0.01 | 0.05 ± 0.01 | 0.09 ± 0.02 | 0.07 ± 0.01 | 0.04 ± 0.01 | 0.03 ± 0.01 | 0.11 ± 0.04 |

|                     |                                           |             |             |             |             |             |             |             |
|---------------------|-------------------------------------------|-------------|-------------|-------------|-------------|-------------|-------------|-------------|
|                     | <i>Hyphomicrobium</i> (129)               | 0.11 ± 0.01 | 0.06 ± 0.01 | 0.15 ± 0.02 | 0.22 ± 0.02 | 0.14 ± 0.01 | 0.23 ± 0.01 | 0.22 ± 0.14 |
|                     | Uncultured AKYH478 (645)                  | 0.01 ± 0.00 | 0.01 ± 0.01 | 0.00 ± 0.00 | 0.01 ± 0.01 | 0.01 ± 0.01 | 0.03 ± 0.00 | 0.12 ± 0.05 |
|                     | Uncultured F0723 (1059)                   | 0.03 ± 0.00 | 0.02 ± 0.00 | 0.00 ± 0.00 | 0.00 ± 0.00 | 0.00 ± 0.00 | 0.03 ± 0.01 | 0.09 ± 0.04 |
|                     | Uncultured MNG7 (35)                      | 0.15 ± 0.01 | 0.17 ± 0.02 | 0.12 ± 0.01 | 0.11 ± 0.01 | 0.09 ± 0.02 | 0.13 ± 0.01 | 0.24 ± 0.07 |
|                     | Uncultured <i>Phyllobacteriaceae</i> (87) | 0.09 ± 0.01 | 0.20 ± 0.04 | 0.05 ± 0.00 | 0.02 ± 0.01 | 0.05 ± 0.03 | 0.09 ± 0.06 | 0.48 ± 0.13 |
|                     | Uncultured <i>Sphingomonadaceae</i> (1)   | 0.09 ± 0.02 | 0.10 ± 0.01 | 0.06 ± 0.02 | 3.26 ± 0.56 | 0.28 ± 0.01 | 7.71 ± 4.09 | 4.41 ± 0.57 |
|                     | Uncultured <i>Sphingomonadaceae</i> (119) | 0.00 ± 0.00 | 0.01 ± 0.00 | 0.01 ± 0.00 | 0.03 ± 0.01 | 0.08 ± 0.06 | 0.02 ± 0.01 | 0.08 ± 0.01 |
|                     | <i>Sphingopyxis</i> (553)                 | 0.02 ± 0.00 | 0.04 ± 0.01 | 0.02 ± 0.00 | 0.02 ± 0.01 | 0.00 ± 0.00 | 0.01 ± 0.01 | 0.01 ± 0.01 |
|                     | <i>Woodsholea</i> (181)                   | 0.03 ± 0.00 | 0.02 ± 0.01 | 0.09 ± 0.02 | 0.07 ± 0.00 | 0.22 ± 0.05 | 0.06 ± 0.00 | 0.06 ± 0.03 |
|                     | <i>Woodsholea</i> (183)                   | 0.02 ± 0.01 | 0.07 ± 0.01 | 0.10 ± 0.02 | 0.08 ± 0.02 | 0.11 ± 0.03 | 0.05 ± 0.02 | 0.12 ± 0.05 |
|                     | <i>Woodsholea</i> (615)                   | 0.02 ± 0.01 | 0.02 ± 0.01 | 0.05 ± 0.02 | 0.02 ± 0.00 | 0.02 ± 0.01 | 0.02 ± 0.00 | 0.02 ± 0.02 |
|                     | Uncultured <i>Rhizobiaceae</i> (100)      | 0.04 ± 0.03 | 0.07 ± 0.01 | 0.03 ± 0.01 | 0.08 ± 0.02 | 0.10 ± 0.05 | 0.02 ± 0.00 | 0.26 ± 0.20 |
|                     | Uncultured AKYH478 (645)                  | 0.01 ± 0.00 | 0.01 ± 0.01 | 0.00 ± 0.00 | 0.01 ± 0.01 | 0.01 ± 0.01 | 0.03 ± 0.00 | 0.12 ± 0.05 |
|                     | <i>Defluviimonas</i> (202)                | 0.06 ± 0.01 | 0.05 ± 0.01 | 0.09 ± 0.02 | 0.07 ± 0.01 | 0.04 ± 0.01 | 0.03 ± 0.01 | 0.11 ± 0.04 |
| Deltaproteobacteria | <i>Bdellovibrio</i> (63)                  | 0.01 ± 0.00 | 0.00 ± 0.00 | 0.00 ± 0.00 | 0.98 ± 0.42 | 0.01 ± 0.00 | 0.16 ± 0.04 | 0.26 ± 0.19 |
|                     | <i>Haliangium</i> (479)                   | 0.01 ± 0.00 | 0.00 ± 0.00 | 0.07 ± 0.01 | 0.07 ± 0.01 | 0.07 ± 0.02 | 0.02 ± 0.01 | 0.02 ± 0.00 |
|                     | <i>Haliangium</i> (248)                   | 0.00 ± 0.00 | 0.00 ± 0.00 | 0.00 ± 0.00 | 0.05 ± 0.01 | 0.27 ± 0.12 | 0.02 ± 0.01 | 0.39 ± 0.19 |
|                     | <i>Haliangium</i> (457)                   | 0.00 ± 0.00 | 0.00 ± 0.00 | 0.04 ± 0.02 | 0.08 ± 0.02 | 0.13 ± 0.00 | 0.05 ± 0.03 | 0.03 ± 0.02 |
|                     | <i>Haliangium</i> (739)                   | 0.01 ± 0.00 | 0.00 ± 0.00 | 0.04 ± 0.02 | 0.07 ± 0.01 | 0.04 ± 0.02 | 0.05 ± 0.02 | 0.03 ± 0.01 |
|                     | OM27-Clade (166)                          | 0.02 ± 0.00 | 0.02 ± 0.01 | 0.02 ± 0.00 | 0.11 ± 0.02 | 0.01 ± 0.01 | 0.61 ± 0.46 | 0.47 ± 0.37 |
|                     | <i>Anaeromyxobacter</i> (220)             | 0.05 ± 0.01 | 0.05 ± 0.01 | 0.12 ± 0.03 | 0.20 ± 0.04 | 0.24 ± 0.07 | 0.18 ± 0.01 | 0.18 ± 0.01 |
|                     | <i>Anaeromyxobacter</i> (82)              | 0.16 ± 0.00 | 0.15 ± 0.05 | 0.29 ± 0.08 | 0.53 ± 0.09 | 0.45 ± 0.06 | 0.59 ± 0.07 | 0.17 ± 0.06 |
|                     | <i>Sandaracinus</i> (260)                 | 0.01 ± 0.00 | 0.00 ± 0.00 | 0.07 ± 0.01 | 0.25 ± 0.08 | 0.16 ± 0.01 | 0.07 ± 0.06 | 0.18 ± 0.13 |
|                     | <i>Sandaracinus</i> (382)                 | 0.01 ± 0.00 | 0.00 ± 0.00 | 0.09 ± 0.01 | 0.26 ± 0.06 | 0.01 ± 0.00 | 0.06 ± 0.04 | 0.02 ± 0.02 |

|                                            |                                          |             |             |             |             |             |             |             |
|--------------------------------------------|------------------------------------------|-------------|-------------|-------------|-------------|-------------|-------------|-------------|
|                                            | <i>Sorangium</i> (709)                   | 0.00 ± 0.00 | 0.00 ± 0.00 | 0.17 ± 0.02 | 0.10 ± 0.02 | 0.10 ± 0.04 | 0.04 ± 0.01 | 0.01 ± 0.01 |
|                                            | <i>Sorangium</i> (1348)                  | 0.00 ± 0.00 | 0.00 ± 0.00 | 0.06 ± 0.02 | 0.06 ± 0.01 | 0.01 ± 0.00 | 0.00 ± 0.00 | 0.00 ± 0.00 |
|                                            | <i>Sorangium</i> (352)                   | 0.00 ± 0.00 | 0.00 ± 0.00 | 0.03 ± 0.01 | 0.03 ± 0.00 | 0.36 ± 0.10 | 0.00 ± 0.00 | 0.26 ± 0.12 |
|                                            | Uncultured <i>Cystobacteraceae</i> (203) | 0.05 ± 0.00 | 0.03 ± 0.00 | 0.21 ± 0.03 | 0.12 ± 0.04 | 0.05 ± 0.01 | 0.21 ± 0.04 | 0.27 ± 0.09 |
|                                            | Uncultured <i>Sandaracinaceae</i> (33)   | 0.01 ± 0.01 | 0.00 ± 0.00 | 0.73 ± 0.08 | 1.20 ± 0.17 | 1.50 ± 0.17 | 0.44 ± 0.14 | 0.21 ± 0.04 |
|                                            | Uncultured <i>Sandaracinaceae</i> (404)  | 0.00 ± 0.00 | 0.00 ± 0.00 | 0.07 ± 0.01 | 0.21 ± 0.05 | 0.09 ± 0.01 | 0.02 ± 0.00 | 0.01 ± 0.00 |
|                                            | Uncultured <i>Sandaracinaceae</i> (686)  | 0.00 ± 0.00 | 0.00 ± 0.00 | 0.00 ± 0.00 | 0.11 ± 0.03 | 0.00 ± 0.01 | 0.04 ± 0.02 | 0.00 ± 0.00 |
|                                            | Uncultured <i>Sandaracinaceae</i> (240)  | 0.00 ± 0.00 | 0.00 ± 0.00 | 0.07 ± 0.02 | 0.18 ± 0.04 | 0.28 ± 0.01 | 0.14 ± 0.00 | 0.11 ± 0.04 |
|                                            | Uncultured <i>Sandaracinaceae</i> (764)  | 0.00 ± 0.00 | 0.00 ± 0.00 | 0.01 ± 0.00 | 0.03 ± 0.01 | 0.13 ± 0.03 | 0.00 ± 0.00 | 0.00 ± 0.00 |
|                                            | Uncultured Sh765B-TzT-29 (414)           | 0.00 ± 0.00 | 0.00 ± 0.00 | 0.03 ± 0.00 | 0.02 ± 0.01 | 0.05 ± 0.01 | 0.02 ± 0.00 | 0.05 ± 0.01 |
|                                            | Uncultured $\delta$ -bacteria (105)      | 0.00 ± 0.00 | 0.00 ± 0.00 | 0.00 ± 0.00 | 0.00 ± 0.01 | 0.00 ± 0.00 | 0.00 ± 0.00 | 0.21 ± 0.15 |
|                                            | Uncultured $\delta$ -bacteria (54)       | 0.00 ± 0.00 | 0.00 ± 0.00 | 0.00 ± 0.00 | 0.01 ± 0.00 | 0.28 ± 0.21 | 0.00 ± 0.00 | 0.18 ± 0.11 |
|                                            | <i>Phaselicystis</i> (163)               | 0.00 ± 0.00 | 0.00 ± 0.00 | 0.00 ± 0.00 | 0.00 ± 0.00 | 0.00 ± 0.00 | 0.00 ± 0.00 | 0.30 ± 0.28 |
| Gammaproteobacteria (Betaproteobacterales) | <i>Hydrogenophaga</i> (9)                | 0.01 ± 0.00 | 0.01 ± 0.00 | 0.10 ± 0.01 | 0.24 ± 0.02 | 0.61 ± 0.01 | 0.24 ± 0.14 | 1.11 ± 0.14 |
|                                            | <i>Leeia</i> (513)                       | 0.05 ± 0.01 | 0.02 ± 0.01 | 0.03 ± 0.01 | 0.15 ± 0.06 | 0.05 ± 0.03 | 0.02 ± 0.00 | 0.01 ± 0.01 |
|                                            | <i>Piscinibacter</i> (14)                | 0.17 ± 0.02 | 0.07 ± 0.03 | 0.65 ± 0.23 | 0.48 ± 0.06 | 1.27 ± 0.19 | 0.46 ± 0.01 | 1.76 ± 0.44 |
|                                            | <i>Rhizobacter</i> (123)                 | 0.01 ± 0.00 | 0.01 ± 0.00 | 0.20 ± 0.07 | 0.12 ± 0.03 | 0.09 ± 0.02 | 0.26 ± 0.11 | 0.17 ± 0.06 |
|                                            | Uncultured <i>Comamonadaceae</i> (4)     | 0.28 ± 0.06 | 0.23 ± 0.03 | 0.90 ± 0.18 | 0.71 ± 0.11 | 1.35 ± 0.21 | 1.03 ± 0.01 | 2.70 ± 0.48 |
|                                            | Uncultured <i>Comamonadaceae</i> (36)    | 0.03 ± 0.02 | 0.02 ± 0.00 | 0.29 ± 0.09 | 0.25 ± 0.05 | 0.64 ± 0.10 | 0.49 ± 0.13 | 1.98 ± 0.36 |
|                                            | Uncultured <i>Comamonadaceae</i> (113)   | 0.01 ± 0.00 | 0.01 ± 0.00 | 0.00 ± 0.00 | 0.09 ± 0.05 | 0.09 ± 0.05 | 0.38 ± 0.31 | 0.30 ± 0.15 |
|                                            | Uncultured <i>Comamonadaceae</i> (152)   | 0.06 ± 0.02 | 0.02 ± 0.01 | 0.14 ± 0.04 | 0.13 ± 0.02 | 0.26 ± 0.01 | 0.18 ± 0.01 | 0.65 ± 0.23 |
|                                            | Uncultured <i>Comamonadaceae</i> (1113)  | 0.01 ± 0.00 | 0.00 ± 0.00 | 0.00 ± 0.00 | 0.01 ± 0.00 | 0.03 ± 0.03 | 0.13 ± 0.01 | 0.01 ± 0.01 |
|                                            | Uncultured <i>Comamonadaceae</i> (12)    | 0.6 ± 0.07  | 0.51 ± 0.07 | 0.91 ± 0.21 | 0.51 ± 0.03 | 1.01 ± 0.14 | 0.65 ± 0.11 | 1.58 ± 0.34 |
|                                            | <i>Azohydromonas</i> (43)                | 0.07 ± 0.02 | 0.03 ± 0.01 | 0.16 ± 0.04 | 0.11 ± 0.01 | 0.11 ± 0.03 | 0.14 ± 0.00 | 0.47 ± 0.09 |



|                                            |             |             |             |             |             |             |             |
|--------------------------------------------|-------------|-------------|-------------|-------------|-------------|-------------|-------------|
| Uncultured <i>Gallionellaceae</i> (320)    | 0.06 ± 0.03 | 0.10 ± 0.01 | 0.07 ± 0.02 | 0.08 ± 0.01 | 0.03 ± 0.00 | 0.05 ± 0.02 | 0.02 ± 0.01 |
| Uncultured <i>Nitrosomonadaceae</i> (20)   | 0.07 ± 0.03 | 0.05 ± 0.02 | 0.06 ± 0.01 | 0.09 ± 0.02 | 0.13 ± 0.04 | 0.14 ± 0.01 | 0.21 ± 0.06 |
| Uncultured <i>Nitrosomonadaceae</i> (350)  | 0.01 ± 0.01 | 0.03 ± 0.02 | 0.01 ± 0.00 | 0.01 ± 0.01 | 0.01 ± 0.01 | 0.00 ± 0.00 | 0.04 ± 0.03 |
| Uncultured <i>Nitrosomonadaceae</i> (92)   | 0.04 ± 0.03 | 0.04 ± 0.01 | 0.03 ± 0.02 | 0.03 ± 0.01 | 0.04 ± 0.00 | 0.03 ± 0.01 | 0.05 ± 0.02 |
| Uncultured <i>Oxalobacteraceae</i> (215)   | 0.00 ± 0.00 | 0.00 ± 0.00 | 0.00 ± 0.00 | 0.07 ± 0.05 | 0.03 ± 0.01 | 0.03 ± 0.01 | 0.01 ± 0.00 |
| <i>Vogesella</i> (44)                      | 0.00 ± 0.00 | 0.00 ± 0.00 | 0.00 ± 0.00 | 0.00 ± 0.00 | 0.00 ± 0.00 | 0.00 ± 0.00 | 0.00 ± 0.00 |
| <i>Dechloromonas</i> (138)                 | 0.05 ± 0.00 | 0.04 ± 0.01 | 0.04 ± 0.00 | 0.03 ± 0.00 | 0.01 ± 0.00 | 0.04 ± 0.00 | 0.02 ± 0.01 |
| <i>Thauera</i> (40)                        | 0.01 ± 0.00 | 0.01 ± 0.01 | 0.02 ± 0.00 | 0.02 ± 0.01 | 0.00 ± 0.00 | 0.04 ± 0.00 | 0.02 ± 0.01 |
| Uncultured SC-I-84 (89)                    | 0.05 ± 0.01 | 0.02 ± 0.02 | 0.06 ± 0.01 | 0.09 ± 0.01 | 0.04 ± 0.01 | 0.19 ± 0.05 | 0.13 ± 0.03 |
| Uncultured SC-I-84 (354)                   | 0.01 ± 0.01 | 0.00 ± 0.00 | 0.01 ± 0.00 | 0.02 ± 0.01 | 0.01 ± 0.00 | 0.03 ± 0.02 | 0.03 ± 0.01 |
| Uncultured $\beta$ -proteobacteria (66)    | 0.13 ± 0.07 | 0.07 ± 0.00 | 0.05 ± 0.00 | 0.19 ± 0.05 | 0.15 ± 0.00 | 0.30 ± 0.00 | 0.57 ± 0.10 |
| <i>Zoogloea</i> (266)                      | 0.00 ± 0.00 | 0.00 ± 0.00 | 0.00 ± 0.00 | 0.00 ± 0.00 | 0.00 ± 0.00 | 0.00 ± 0.00 | 0.00 ± 0.00 |
| <i>Acidiferrobacter</i> (67)               | 0.36 ± 0.12 | 0.41 ± 0.10 | 0.18 ± 0.02 | 0.31 ± 0.03 | 0.23 ± 0.05 | 0.26 ± 0.04 | 0.10 ± 0.02 |
| <i>Arenimonas</i> (520)                    | 0.00 ± 0.00 | 0.00 ± 0.00 | 0.01 ± 0.00 | 0.08 ± 0.01 | 0.07 ± 0.02 | 0.08 ± 0.00 | 0.01 ± 0.00 |
| <i>Arenimonas</i> (357)                    | 0.00 ± 0.00 | 0.00 ± 0.00 | 0.01 ± 0.00 | 0.07 ± 0.01 | 0.00 ± 0.00 | 0.09 ± 0.03 | 0.02 ± 0.01 |
| <i>Pseudomonas</i> (24)                    | 0.00 ± 0.00 | 0.02 ± 0.01 | 0.08 ± 0.01 | 0.33 ± 0.12 | 0.19 ± 0.02 | 0.21 ± 0.04 | 0.06 ± 0.01 |
| Uncultured <i>Pseudomonadaceae</i> (3)     | 0.00 ± 0.00 | 0.02 ± 0.01 | 0.00 ± 0.00 | 0.00 ± 0.00 | 0.00 ± 0.00 | 0.00 ± 0.00 | 0.00 ± 0.00 |
| <i>Thermomonas</i> (58)                    | 0.02 ± 0.01 | 0.06 ± 0.02 | 0.05 ± 0.01 | 0.12 ± 0.03 | 0.19 ± 0.09 | 0.15 ± 0.03 | 0.09 ± 0.03 |
| Uncultured <i>Xanthomonadaceae</i> (70)    | 0.02 ± 0.00 | 0.07 ± 0.03 | 0.07 ± 0.02 | 0.14 ± 0.01 | 0.05 ± 0.02 | 0.03 ± 0.00 | 0.11 ± 0.03 |
| Uncultured $\gamma$ -proteobacteria (452)  | 0.00 ± 0.00 | 0.00 ± 0.00 | 0.07 ± 0.02 | 0.14 ± 0.03 | 0.07 ± 0.03 | 0.06 ± 0.02 | 0.02 ± 0.01 |
| Uncultured $\gamma$ -proteobacteria (541)  | 0.00 ± 0.00 | 0.00 ± 0.00 | 0.00 ± 0.00 | 0.13 ± 0.01 | 0.10 ± 0.01 | 0.00 ± 0.00 | 0.00 ± 0.00 |
| Uncultured $\gamma$ -proteobacteria (505)  | 0.02 ± 0.02 | 0.04 ± 0.01 | 0.05 ± 0.02 | 0.05 ± 0.02 | 0.04 ± 0.01 | 0.07 ± 0.02 | 0.05 ± 0.01 |
| Uncultured $\gamma$ -proteobacteria (715)  | 0.00 ± 0.00 | 0.00 ± 0.00 | 0.01 ± 0.01 | 0.05 ± 0.01 | 0.01 ± 0.00 | 0.07 ± 0.05 | 0.00 ± 0.00 |
| Uncultured $\gamma$ -proteobacteria (1758) | 0.00 ± 0.00 | 0.00 ± 0.00 | 0.00 ± 0.00 | 0.01 ± 0.01 | 0.00 ± 0.00 | 0.00 ± 0.00 | 0.00 ± 0.00 |

|                  |                                   |             |             |             |             |             |             |             |
|------------------|-----------------------------------|-------------|-------------|-------------|-------------|-------------|-------------|-------------|
|                  | <i>Acidiferrobacter</i> (196)     | 0.13 ± 0.06 | 0.13 ± 0.05 | 0.05 ± 0.02 | 0.07 ± 0.01 | 0.05 ± 0.00 | 0.06 ± 0.02 | 0.03 ± 0.00 |
| Saccharibacteria | Uncultured Saccharibacteria (980) | 0.00 ± 0.00 | 0.00 ± 0.00 | 0.00 ± 0.00 | 0.01 ± 0.00 | 0.01 ± 0.00 | 0.00 ± 0.00 | 0.00 ± 0.00 |
| Verrucomicrobia  | <i>Prostheco bacter</i> (162)     | 0.03 ± 0.01 | 0.02 ± 0.01 | 0.03 ± 0.00 | 0.10 ± 0.02 | 0.07 ± 0.04 | 0.57 ± 0.04 | 0.09 ± 0.02 |
|                  | <i>Verrucomicrobium</i> (903)     | 0.00 ± 0.00 | 0.00 ± 0.00 | 0.00 ± 0.00 | 0.01 ± 0.01 | 0.01 ± 0.01 | 0.11 ± 0.04 | 0.13 ± 0.02 |
|                  | Uncultured DEV007 (1517)          | 0.00 ± 0.00 | 0.00 ± 0.00 | 0.00 ± 0.00 | 0.00 ± 0.00 | 0.00 ± 0.00 | 0.00 ± 0.00 | 0.10 ± 0.03 |
| Unclassified     | Uncultured bacterium (315)        | 0.00 ± 0.00 | 0.00 ± 0.00 | 0.00 ± 0.00 | 0.02 ± 0.00 | 0.16 ± 0.01 | 0.00 ± 0.00 | 0.00 ± 0.00 |
|                  | Uncultured bacterium (255)        | 0.00 ± 0.00 | 0.00 ± 0.00 | 0.00 ± 0.00 | 0.01 ± 0.00 | 0.06 ± 0.04 | 0.02 ± 0.02 | 0.24 ± 0.21 |
